# Supplementary material for: Neutralization of SARS-CoV-2 Omicron variant by sera from BNT162b2 or Coronavac vaccine recipients
Source: medRxiv preprint, doi:10.1101/2021.12.13.21267668, version 1 (2021-12-14)
Supplement: Supplementary Table S1 [file 267668_file03.pdf]

| Accession ID                                                                                                                                                                                                                                                                                                                                                                                                                                                                                                                                                                                                                                                                                                                    | Originating Laboratory                                                                              | Submitting Laboratory                                                                                                                        | Authors                                                                                                                                                                                                                                                                                                                                                                                                                                                                                            |
|---------------------------------------------------------------------------------------------------------------------------------------------------------------------------------------------------------------------------------------------------------------------------------------------------------------------------------------------------------------------------------------------------------------------------------------------------------------------------------------------------------------------------------------------------------------------------------------------------------------------------------------------------------------------------------------------------------------------------------|-----------------------------------------------------------------------------------------------------|----------------------------------------------------------------------------------------------------------------------------------------------|----------------------------------------------------------------------------------------------------------------------------------------------------------------------------------------------------------------------------------------------------------------------------------------------------------------------------------------------------------------------------------------------------------------------------------------------------------------------------------------------------|
| EPI_ISL_7543837, EPI_ISL_7543885, EPI_ISL_7544121, EPI_ISL_7544319, EPI_ISL_7544369, EPI_ISL_7544456, EPI_ISL_7544613, EPI_ISL_7544642, EPI_ISL_7544715                                                                                                                                                                                                                                                                                                                                                                                                                                                                                                                                                                         | see above                                                                                           | 2 Military Hospital wc MAA<br>NHLS/UCT                                                                                                       | Arash Iranzadeh; Bruna Galvao; Carolyn Williamson; Deelan Doolabh; Diana Hardie; Gert Marais; Innocent Mudau; Luicer Olubayo; Lynn Tyers; Marvin Hsiao; Nokuzola Mbhele; Rageema Joseph; Stephen Korsman                                                                                                                                                                                                                                                                                           |
| EPI_ISL_7495248, EPI_ISL_7495249, EPI_ISL_7495250                                                                                                                                                                                                                                                                                                                                                                                                                                                                                                                                                                                                                                                                               | A. Krumholz, Labor Dr. Krause und Kollegen MVZ GmbH, Kiel                                           | Charité Universitätsmedizin Berlin, Institut für Virologie                                                                                   | Barbara Mühlemann; Christian Drosten; Julia Schneider; Julia Tesch; Jörn Beheim-Schwarzbach; Talitha Veith; Terry Jones; Tobias Bleicker; Victor M Corman                                                                                                                                                                                                                                                                                                                                          |
| EPI_ISL_7405721                                                                                                                                                                                                                                                                                                                                                                                                                                                                                                                                                                                                                                                                                                                 | A.S.L. CITTA DI TORINO - OSPEDALE AMEDEO DI SAVOIA                                                  | Fondazione del Piemonte per l'Oncologia IRCCS                                                                                                | Antonino Sottile; Giorgio Giardina; Paola Marino; Silvia Brossa                                                                                                                                                                                                                                                                                                                                                                                                                                    |
| EPI_ISL_7306737                                                                                                                                                                                                                                                                                                                                                                                                                                                                                                                                                                                                                                                                                                                 | A.S.L. TO4                                                                                          | Fondazione del Piemonte per l'Oncologia IRCCS                                                                                                | Antonino Sottile; Giorgio Giardina; Paola Marino; Silvia Brossa                                                                                                                                                                                                                                                                                                                                                                                                                                    |
| EPI_ISL_7016910                                                                                                                                                                                                                                                                                                                                                                                                                                                                                                                                                                                                                                                                                                                 | ACT Pathology                                                                                       | Schwessinger Lab                                                                                                                             | Ashley Jones; Austin Bird; Bayantes Dagvadorj; Benjamin Schwessinger; Carolina Correa Ospina; Catalina Barragán Quintero; Craig Kennedy; Elise Kellett; Emma Crean; Evie Hodgson; Gabrielle Smith; Karina Kennedy; Rachel Leonard; Rene Riedelbauch; Robyn Hall; Salome Wilson; Scott Ferguson                                                                                                                                                                                                     |
| EPI_ISL_6891760, EPI_ISL_7129657, EPI_ISL_7129884, EPI_ISL_7130085, EPI_ISL_7130189, EPI_ISL_7130344, EPI_ISL_7130486                                                                                                                                                                                                                                                                                                                                                                                                                                                                                                                                                                                                           | see above                                                                                           | AGES-Institute for medical Microbiology and Hygiene Vienna                                                                                   | Alexander Indra; Elisabeth Polster; Florian Heger; Julia Kikiovits; Kathrin Lippert; Marion Blaschitz; Patrick Hyden; Peter Hufnagl; Stefanie Dobrovolny; Vera Wallner                                                                                                                                                                                                                                                                                                                             |
| EPI_ISL_7381191                                                                                                                                                                                                                                                                                                                                                                                                                                                                                                                                                                                                                                                                                                                 | AHRI                                                                                                | CERI, Centre for Epidemic Response and Innovation, Stellenbosch University and KRISP, KZN Research Innovation and Sequencing Platform, UKZN. | Arisha Maharaj; Bernstein Mallory; Cele Sandile; Glandhari J; Karim Farina; Khan Khadija; Moir M; Naidoo Y; Pillay S; Ramphal U; Ramphal Y; San JE; Sigal Alex; Tegally H; Tshiabula D; Wilkinson E; de Oliveira T; van Wyk S                                                                                                                                                                                                                                                                      |
| EPI_ISL_7358094                                                                                                                                                                                                                                                                                                                                                                                                                                                                                                                                                                                                                                                                                                                 | AHRI-Sigal                                                                                          | CERI, Centre for Epidemic Response and Innovation, Stellenbosch University and KRISP, KZN Research Innovation and Sequencing Platform, UKZN. | Bernstein Mallory; Cele Sandile; Glandhari J; Karim Farina; Khan Khadija; Moir M; Naidoo Y; Nokukhanya Mdlalose; Pillay S; Ramphal U; Ramphal Y; San JE; Sigal Alex; Tegally H; Tshiabula D; Wilkinson E; de Oliveira T                                                                                                                                                                                                                                                                            |
| EPI_ISL_7154405                                                                                                                                                                                                                                                                                                                                                                                                                                                                                                                                                                                                                                                                                                                 | Aegis Sciences Corporation                                                                          | Centers for Disease Control and Prevention Division of Viral Diseases, Pathogen Discovery                                                    | Alec Vest; Benjamin Rambo-Martin; Christopher Gulvick; Clinton Paden; Cyndi Clark; Dakota Howard; Dhvani Batra; Dillon Nall; Duncan MacCannell; Erisa Sula; Ethan Sanders; Holly Houdeshell; Jason Caravas; Kristine Lacey; Matthew Hardison; Matthew Schremer; Ola Kvalvaag; Patrick Campbell; Peter Cook; Rob Case; Scott Sammons; Shatavia Morrison; Shaun Westlund; Tymeckia Kendall; Victoria Caban Figueroa; Vikramsinha Ghorpade; Yvette Unorunmi                                           |
| EPI_ISL_7452769, EPI_ISL_7452775                                                                                                                                                                                                                                                                                                                                                                                                                                                                                                                                                                                                                                                                                                | Aesculabur Hamburg, Institut der Labormedizin                                                       | Heinrich Pette Institute, Leibniz Institute for Experimental Virology                                                                        | Adam Grundhoff; Alexis Robitaille; Johannes Knobloch; Martin Aepfelbacher; Nicole Fischer; Thomas Günther                                                                                                                                                                                                                                                                                                                                                                                          |
| EPI_ISL_7470217, EPI_ISL_7470278, EPI_ISL_7470360, EPI_ISL_7470368, EPI_ISL_7470391, EPI_ISL_7470446                                                                                                                                                                                                                                                                                                                                                                                                                                                                                                                                                                                                                            | Akershus University Hospital, Department for Microbiology and Infectious Disease Control            | Norwegian Institute of Public Health, Department of Virology                                                                                 | Atiya R Ali; Debec Nadia; Engebretsen Serina Beate; Garcia Llorente Ignacio; Hilde Elshaug; Hilde Vollen; Jon Bråte; Kamilla Heddeland Instefjord; Karoline Bragstad; Kathrine Stene-Johansen; Line Victoria Moen; Marie Paulsen Madsen; Olav Hungnes; Pedersen Benedikte Nevjen; Rasmus Riis Kopperud                                                                                                                                                                                             |
| EPI_ISL_7146436, EPI_ISL_7506705                                                                                                                                                                                                                                                                                                                                                                                                                                                                                                                                                                                                                                                                                                | Allergy, Immunology and Cell Biology Unit (AICBU)                                                   | Allergy, Immunology and Cell Biology Unit (AICBU)                                                                                            | Ayesha Wijesinghe; Chandima Jeewandara; Deshni Jayathilaka; Dinuka Ariyaratne; Diyanath Ranasinghe; Dumni Guasinghe; Farha Bary; Gathsaurie Neelika Malavige; Tibutius Thanesh                                                                                                                                                                                                                                                                                                                     |
| EPI_ISL_7544441                                                                                                                                                                                                                                                                                                                                                                                                                                                                                                                                                                                                                                                                                                                 | Alma CDC wc AHC                                                                                     | NHLS/UCT                                                                                                                                     | Arash Iranzadeh; Bruna Galvao; Carolyn Williamson; Deelan Doolabh; Diana Hardie; Gert Marais; Innocent Mudau; Luicer Olubayo; Lynn Tyers; Marvin Hsiao; Nokuzola Mbhele; Rageema Joseph; Stephen Korsman                                                                                                                                                                                                                                                                                           |
| EPI_ISL_7264139, EPI_ISL_7265455, EPI_ISL_7265456                                                                                                                                                                                                                                                                                                                                                                                                                                                                                                                                                                                                                                                                               | Alpha Labs                                                                                          | National Microbiology Laboratory (NML)                                                                                                       | Anna Majer; Anneliese Landgraff; CanCOGen's metadata curation team; Darian Hole; Dynacare Brampton COVID-19 Diagnostic team; Elsie Grudeski; Gary Van Donselaar; Gordon Jolly; Grace Seo; Jennifer Tanner; Madison Chapel; Morag Graham; Natalie Knox; Nathalie Bastien; Philip Mabon; Public Health Agency of Canada CanCOGen team; Rhianon Huzarewich; Russell Mandes; Shari Tyson; Timothy Booth; Yan Li                                                                                        |
| EPI_ISL_6914011, EPI_ISL_6914012, EPI_ISL_6914013, EPI_ISL_6914014, EPI_ISL_6914015, EPI_ISL_6914016, EPI_ISL_6914017, EPI_ISL_6914018, EPI_ISL_6914019, EPI_ISL_6914020, EPI_ISL_6914021, EPI_ISL_6914022, EPI_ISL_6914023, EPI_ISL_6914024, EPI_ISL_6914025, EPI_ISL_6914026, EPI_ISL_6914027, EPI_ISL_6914028, EPI_ISL_6914029, EPI_ISL_6914030, EPI_ISL_6914032, EPI_ISL_6914033, EPI_ISL_6914034, EPI_ISL_6914035, EPI_ISL_6914036                                                                                                                                                                                                                                                                                         | see above                                                                                           | AmPATH Laboratories                                                                                                                          | Amoako DG; Bhiman JN; Everatt J; Ismail A; Mahlangu B; Mnguni A; Mohale T; Ntuli N; Scheepers C; Wolter N                                                                                                                                                                                                                                                                                                                                                                                          |
| EPI_ISL_7011321                                                                                                                                                                                                                                                                                                                                                                                                                                                                                                                                                                                                                                                                                                                 | Area of Virology, Serology and Virology Division (SAVID), New South Wales Health Pathology Randwick | Virology Research Laboratory; Area of Virology, Serology and Virology Division (SAVID), New South Wales Health Pathology Randwick            | Au, J.; Bull, R.; Deveson, I.; Foster, C.; Rawlinson, W.; Ruiz Silva, M.; Van Hal, S.                                                                                                                                                                                                                                                                                                                                                                                                              |
| EPI_ISL_7503376, EPI_ISL_7503377, EPI_ISL_7503378, EPI_ISL_7548950, EPI_ISL_7548951, EPI_ISL_7548952                                                                                                                                                                                                                                                                                                                                                                                                                                                                                                                                                                                                                            | Arizona State University                                                                            | Arizona State University                                                                                                                     | Efrem S. Lim; Joshua LaBaer; LaRinda A. Holland; Matthew F. Smith; Nathaniel Johnson; Regan A. Sullins; Steven C. Holland; Vel Murugan                                                                                                                                                                                                                                                                                                                                                             |
| EPI_ISL_6963510                                                                                                                                                                                                                                                                                                                                                                                                                                                                                                                                                                                                                                                                                                                 | Auriga Research Pvt.Ltd / Strand Life Sciences                                                      | National Centre for Biological Sciences, TIFR - Rockefeller Foundation                                                                       | Aarati Karaba; Anson Kunjumon George; Aparnaa Ramanathan; Apurva Sarin; Chandrasekhar Vadlamudi; Chitra Pattabiraman; Darshan Sreenivas; Dasaradhi Palakodeti; Dimple Notani; Divya Priya A; Madhusudan J; Manisha Bharadwaj; Manoj Kumar Jha; Mudasiir Nazaar; Pradeep B P; Priyanka Ananta Mulay; Ramesh Hariharan; Rohan Pais; Satyajit Mayor; Saumitra Mardikar; Srivathsan Adimoolam; Uma Ramakrishnan; Vamsi Veeramachaneni; Vasanthapuram Ravi; Vijay Chandru; Vishal G Rao; Yasodha Kannan |
| EPI_ISL_7195246, EPI_ISL_7195247, EPI_ISL_7195248                                                                                                                                                                                                                                                                                                                                                                                                                                                                                                                                                                                                                                                                               | Austrian Agency for Health and Food Safety (AGES)                                                   | Berghaler laboratory, CeMM Research Center for Molecular Medicine of the Austrian Academy of Sciences                                        | Andreas Berghaler; Anna Schedl; Bekir Erguner; Benedikt Agerer; Christoph Bock; Fabian Amman; Jan Laine; Lukas Endler; Martin Senekowitsch; Matthew Thornton; Michael Schuster; Michelle Chan; Petr Triska; Thomas Penz                                                                                                                                                                                                                                                                            |
| EPI_ISL_7502111                                                                                                                                                                                                                                                                                                                                                                                                                                                                                                                                                                                                                                                                                                                 | Ayass Bioscience LLC                                                                                | Ayass Bioscience LLC                                                                                                                         | Kevin Zhu; Lina Abi Moleh; Mohamad Ammar Ayass; Natalya Griko; Nazanin Taheri                                                                                                                                                                                                                                                                                                                                                                                                                      |
| EPI_ISL_7400565                                                                                                                                                                                                                                                                                                                                                                                                                                                                                                                                                                                                                                                                                                                 | Azienda Ospedaliera Pugliese Ciaccio di Catanzaro SOC Microbiologia e Virologia                     | Azienda Ospedaliera Pugliese Ciaccio di Catanzaro SOC Microbiologia e Virologia                                                              | Rossana Tallero Cincia Peronace Federica Pasceri Marco De Fazio Ilenia Talotta Giuseppina Panduri Pasquale Minchella                                                                                                                                                                                                                                                                                                                                                                               |
| EPI_ISL_7338921                                                                                                                                                                                                                                                                                                                                                                                                                                                                                                                                                                                                                                                                                                                 | Azienda Sanitaria dell'Alto Adige - Laboratorio Aziendale di Microbiologia e Virologia              | Azienda Sanitaria dell'Alto Adige                                                                                                            | Irene Bianconi                                                                                                                                                                                                                                                                                                                                                                                                                                                                                     |
| EPI_ISL_7226262                                                                                                                                                                                                                                                                                                                                                                                                                                                                                                                                                                                                                                                                                                                 | BNH Hospital                                                                                        | National Institute of Health, Department of Medical Sciences, Ministry of Public Health, Thailand                                            | Archawin Rojanawiwat; Ballang Uppapong; Beth Skaggs; Donlaya Maunplueng; Kazuhisa Okada; Nuttida Thongpramul; Pakorn Piromtong; Pilailuk Akkapaiboon Okada; Piroon Jenjaroenpun; Pongpun Sawatwong; Prapat Suriyaphol; Sirikanda Wimol; Siripaporn Phuyugun; Sittiporn Parmeen; Supakit Sirilak; Suratchana Mitrat; Thanutsapa Thanadachakul; Thidathip Wongsurawat                                                                                                                                |
| EPI_ISL_7149647, EPI_ISL_7197950, EPI_ISL_7346925, EPI_ISL_7347257, EPI_ISL_7347522, EPI_ISL_7355779, EPI_ISL_7391885, EPI_ISL_7391908, EPI_ISL_7391931, EPI_ISL_7391984, EPI_ISL_7392005, EPI_ISL_7392027, EPI_ISL_7392079, EPI_ISL_7392087, EPI_ISL_7392093, EPI_ISL_7392139, EPI_ISL_7485998, EPI_ISL_7486106, EPI_ISL_7486193, EPI_ISL_7486452, EPI_ISL_7486697, EPI_ISL_7486742, EPI_ISL_7486808, EPI_ISL_7486814, EPI_ISL_7486823, EPI_ISL_7486823, EPI_ISL_7487524, EPI_ISL_7487623, EPI_ISL_7487665, EPI_ISL_7487692, EPI_ISL_7512352, EPI_ISL_7512373, EPI_ISL_7512378, EPI_ISL_7512381, EPI_ISL_7512410, EPI_ISL_7512438, EPI_ISL_7512444, EPI_ISL_7520500, EPI_ISL_7538419, EPI_ISL_7538529, EPI_ISL_7538539, EPI_IS |                                                                                                     |                                                                                                                                              |                                                                                                                                                                                                                                                                                                                                                                                                                                                                                                    |

|                                                                                                                                                                                                                                                                                                                                                                                                                                                                                                                                                                                                                                                                                                                                                                            |                                                                                                                |                                                                                                            |                                                                                                                                                                                                                                                                                                                                                                                                                                                                                         |                                                                                                                                             |
|----------------------------------------------------------------------------------------------------------------------------------------------------------------------------------------------------------------------------------------------------------------------------------------------------------------------------------------------------------------------------------------------------------------------------------------------------------------------------------------------------------------------------------------------------------------------------------------------------------------------------------------------------------------------------------------------------------------------------------------------------------------------------|----------------------------------------------------------------------------------------------------------------|------------------------------------------------------------------------------------------------------------|-----------------------------------------------------------------------------------------------------------------------------------------------------------------------------------------------------------------------------------------------------------------------------------------------------------------------------------------------------------------------------------------------------------------------------------------------------------------------------------------|---------------------------------------------------------------------------------------------------------------------------------------------|
| see above                                                                                                                                                                                                                                                                                                                                                                                                                                                                                                                                                                                                                                                                                                                                                                  | Botswana Harvard HIV Reference Laboratory                                                                      | Botswana Harvard AIDS Institute Partnership, Plot 1836 North Ring Road, Princess Marina Hospital, Gaborone | Boitumelo Zuze; Botshelo Radibe; Dorcas Maruapula; Doreen Ditshwanelo; Joseph Makhema; Keoratile Ntshambiwa; Kgomoiso Moruisi; Legodile Koepile; Mosepele Mosepele; Mphaphi B. Mbulawa; Ontlametse T. Bareng; Pamela Smith-Lawrence; Roger Shapiro; Sefetogi Ramaologa; Shahin Lockman; Sikhulile Moyo; Simani Gaseitsiwe; Thongbotho Mphoyakgosi; Wonderful T. Choga                                                                                                                   |                                                                                                                                             |
| EPI_ISL_6640916, EPI_ISL_6640917, EPI_ISL_6640919, EPI_ISL_6670244, EPI_ISL_6752026, EPI_ISL_6752027, EPI_ISL_6774081, EPI_ISL_6774083, EPI_ISL_6774084, EPI_ISL_6774085, EPI_ISL_6774087, EPI_ISL_6774088, EPI_ISL_6774089, EPI_ISL_6774090, EPI_ISL_6774091, EPI_ISL_6774093, EPI_ISL_7121195, EPI_ISL_7121204, EPI_ISL_7121205, EPI_ISL_7380512, EPI_ISL_7380515, EPI_ISL_7380524                                                                                                                                                                                                                                                                                                                                                                                       | see above                                                                                                      | Botswana Harvard HIV Reference Laboratory                                                                  | Botswana Harvard HIV Reference Laboratory                                                                                                                                                                                                                                                                                                                                                                                                                                               |                                                                                                                                             |
| EPI_ISL_7132804, EPI_ISL_7370157, EPI_ISL_7370181, EPI_ISL_7370259, EPI_ISL_7370472                                                                                                                                                                                                                                                                                                                                                                                                                                                                                                                                                                                                                                                                                        | British Columbia Centre For Disease Control                                                                    | BCCDC Public Health Laboratory                                                                             | 655 W 12th Avenue; Ana Pacagnella; BC Canada V5T 2N3; Corrinne Ng; Dan Fornika; John Tyson; Kim Macdonald; Kimia Kamelian; Linda Hoang; Loretta Janz; Mel Krajdren; Prystajecy Natalie; Robert Azana; Shannon Russell; Vancouver                                                                                                                                                                                                                                                        |                                                                                                                                             |
| EPI_ISL_7390696, EPI_ISL_7391208, EPI_ISL_7453171, EPI_ISL_7453991, EPI_ISL_7454277, EPI_ISL_7542815, EPI_ISL_7543162, EPI_ISL_7543543, EPI_ISL_7543579, EPI_ISL_7544427, EPI_ISL_7544520, EPI_ISL_7547858, EPI_ISL_7548157, EPI_ISL_7550313, EPI_ISL_7550474, EPI_ISL_7550515, EPI_ISL_7550529, EPI_ISL_7550748                                                                                                                                                                                                                                                                                                                                                                                                                                                           | see above                                                                                                      | Broad Institute Clinical Research Sequencing Platform                                                      | Adams, G.; B.L.; B.W.; Bauer, M.; Birren; Blumenstiel, B.; Brown, C.; Carter, A.; Chaluvasi, S.; D.J.; DeFelice, M.; DeRuff, K.; Dodge, S.; Gabriel, S.; Gallagher, G.; Gladden-Young, A.; Granger, B.; J.E.; K.J.; Lagerborg, K.; Larkin, K.; Lee, M.; Lemieux; Lennon, N.; Loreth, C.; Madoff, L.; McGovern, S.; Meldrim, J.; Normandin, E.; P.C.; Park; Peariman, L.; Reilly, S.; Rudy, M.; Sabeti; Siddle; Smole, S.; Tomkins-Tinch, C.; Vicente, G.; and MacInnis                  |                                                                                                                                             |
| EPI_ISL_7263830                                                                                                                                                                                                                                                                                                                                                                                                                                                                                                                                                                                                                                                                                                                                                            | CAP Roger de Flor                                                                                              | Banc de Sang i Telxits                                                                                     | Carlos Hobeich; Francisco Vidal; Irene Corrales; Lorena Ramirez; Maria Gloria Soria; Nat6lia Comes; Nina Borr6s; Noemi Gonzalez; Silvia Sauleda                                                                                                                                                                                                                                                                                                                                         |                                                                                                                                             |
| EPI_ISL_7477252                                                                                                                                                                                                                                                                                                                                                                                                                                                                                                                                                                                                                                                                                                                                                            | CDPH VBL                                                                                                       | California Department of Public Health                                                                     | Emily Smith on behalf of CDPH-COVIDNet                                                                                                                                                                                                                                                                                                                                                                                                                                                  |                                                                                                                                             |
| EPI_ISL_7427856                                                                                                                                                                                                                                                                                                                                                                                                                                                                                                                                                                                                                                                                                                                                                            | CENTOGENE Frankfurt Laboratory; Niederlassung Industriepark H6chst                                             | Robert Koch Institute                                                                                      |                                                                                                                                                                                                                                                                                                                                                                                                                                                                                         |                                                                                                                                             |
| EPI_ISL_7547731                                                                                                                                                                                                                                                                                                                                                                                                                                                                                                                                                                                                                                                                                                                                                            | CENTOLAB                                                                                                       | National Reference Laboratory, Nigeria Centre for Disease Control                                          | Catherine Okoi; Chimaobi Chukwu; Dr Ifedayo Adetifa; Dr Ndodo Nnaemeka; Dr Omoare Adesuyi; Nwando Mba; Olajumoke Babatunde; Olusola Anuoluwapo Akanbi; Oyeronke Ayansola                                                                                                                                                                                                                                                                                                                |                                                                                                                                             |
| EPI_ISL_6862897                                                                                                                                                                                                                                                                                                                                                                                                                                                                                                                                                                                                                                                                                                                                                            | CERBALLIANCE                                                                                                   | UMR PIMIT                                                                                                  | David A Wilkinson; Patrick Mavingui                                                                                                                                                                                                                                                                                                                                                                                                                                                     |                                                                                                                                             |
| EPI_ISL_6962948, EPI_ISL_6967758                                                                                                                                                                                                                                                                                                                                                                                                                                                                                                                                                                                                                                                                                                                                           | CERBALLIANCE PARIS ET IDF EST                                                                                  | CERBA HealthCare                                                                                           | B6n6d6cte Roquebert; Johanna Roux; Judith Zerah; Laura Verdurme; Sabine Trombert; St6phanie Haim-Boukobza                                                                                                                                                                                                                                                                                                                                                                               |                                                                                                                                             |
| EPI_ISL_7226961                                                                                                                                                                                                                                                                                                                                                                                                                                                                                                                                                                                                                                                                                                                                                            | CHU de Bordeaux                                                                                                | CNR Virus des Infections Respiratoires - France SUD                                                        | Antonin Bal; Bruno Lina; Bruno Simon; Denis Malvy; Gregory Destras; Gwendolyne Burfin; Hadrien Regue; Laurence Josset; Marie-Edith Lafon; Martine Valette; Pantxiika Bellecave; Quentin Semanas                                                                                                                                                                                                                                                                                         |                                                                                                                                             |
| EPI_ISL_7268670, EPI_ISL_7269933                                                                                                                                                                                                                                                                                                                                                                                                                                                                                                                                                                                                                                                                                                                                           | CLINA-LANCET LABORATORIES                                                                                      | National Reference Laboratory, Nigeria Centre for Disease Control                                          | Catherine Okoi; Chimaobi Chukwu; Dr Ifedayo Adetifa; Dr Ndodo Nnaemeka; Dr Omoare Adesuyi; Nwando Mba; Olajumoke Babatunde; Olusola Anuoluwapo Akanbi; Oyeronke Ayansola                                                                                                                                                                                                                                                                                                                |                                                                                                                                             |
| EPI_ISL_7313633                                                                                                                                                                                                                                                                                                                                                                                                                                                                                                                                                                                                                                                                                                                                                            | CT Department of Public Health                                                                                 | CT Department of Public Health                                                                             | Claire Pearson; Tu N. Nguyen                                                                                                                                                                                                                                                                                                                                                                                                                                                            |                                                                                                                                             |
| EPI_ISL_7137326, EPI_ISL_7137327, EPI_ISL_7137328, EPI_ISL_7137330                                                                                                                                                                                                                                                                                                                                                                                                                                                                                                                                                                                                                                                                                                         | California Department of Public Health                                                                         | California Department of Public Health                                                                     | CDPH IDLB COVIDNet                                                                                                                                                                                                                                                                                                                                                                                                                                                                      |                                                                                                                                             |
| EPI_ISL_7217437, EPI_ISL_7217563                                                                                                                                                                                                                                                                                                                                                                                                                                                                                                                                                                                                                                                                                                                                           | Cantacuzino National Military-Medical Institute, Viral Respiratory Infections Laboratory                       | Cantacuzino Institute Virology                                                                             | Luiza Ustea; Mihaela Lazar; Mihaela Oprea; Nicoleta Paraschiv; Sorin Dinu                                                                                                                                                                                                                                                                                                                                                                                                               |                                                                                                                                             |
| EPI_ISL_6980876                                                                                                                                                                                                                                                                                                                                                                                                                                                                                                                                                                                                                                                                                                                                                            | Cerballiance, Reunion                                                                                          | UMR PIMIT                                                                                                  | David A Wilkinson; Patrick Mavingui                                                                                                                                                                                                                                                                                                                                                                                                                                                     |                                                                                                                                             |
| EPI_ISL_7019047                                                                                                                                                                                                                                                                                                                                                                                                                                                                                                                                                                                                                                                                                                                                                            | Charit6 Universit6tsmedizin Berlin, Institute of Virology                                                      | Charit6 Universit6tsmedizin Berlin, Institute of Virology                                                  | Barbara M6hleemann; Christian Drosten; Julia Schneider; Julia Tesch; J6rn Beheim-Schwarzbach; Talitha Veith; Terry Jones; Tobias Bleicker; Victor M Corman                                                                                                                                                                                                                                                                                                                              |                                                                                                                                             |
| EPI_ISL_7337463, EPI_ISL_7337464, EPI_ISL_7337465, EPI_ISL_7337466, EPI_ISL_7337468, EPI_ISL_7337469, EPI_ISL_7337470, EPI_ISL_7337471, EPI_ISL_7337472, EPI_ISL_7337473, EPI_ISL_7337474, EPI_ISL_7337475, EPI_ISL_7337476, EPI_ISL_7337477, EPI_ISL_7337478, EPI_ISL_7337479, EPI_ISL_7337480, EPI_ISL_7337481, EPI_ISL_7337482, EPI_ISL_7337483, EPI_ISL_7337484, EPI_ISL_7337485, EPI_ISL_7337486, EPI_ISL_7337487, EPI_ISL_7337488, EPI_ISL_7337489, EPI_ISL_7337490, EPI_ISL_7337495, EPI_ISL_7337496, EPI_ISL_7337497, EPI_ISL_7337498, EPI_ISL_7337499, EPI_ISL_7337500, EPI_ISL_7337501, EPI_ISL_7337502, EPI_ISL_7337503, EPI_ISL_7337504, EPI_ISL_7337505, EPI_ISL_7337506, EPI_ISL_7337507, EPI_ISL_7337508, EPI_ISL_7337509, EPI_ISL_7337510, EPI_ISL_7337511 | see above                                                                                                      | Charlotte Maxeke Johannesburg Academic Hospital                                                            | National Institute for Communicable Diseases of the National Health Laboratory Service                                                                                                                                                                                                                                                                                                                                                                                                  | Amoako DG; Bhiman JN; Everatt J; Ismail A; Mahlangu B; Mnguni A; Mohale T; Ntuli N; Scheepers C                                             |
| EPI_ISL_7337512, EPI_ISL_7337513, EPI_ISL_7337515, EPI_ISL_7337516, EPI_ISL_7337517, EPI_ISL_7337518, EPI_ISL_7337520, EPI_ISL_7337521, EPI_ISL_7337524, EPI_ISL_7337525, EPI_ISL_7337527, EPI_ISL_7337528, EPI_ISL_7337531, EPI_ISL_7337532, EPI_ISL_7337533, EPI_ISL_7337534, EPI_ISL_7337535, EPI_ISL_7337536, EPI_ISL_7337537, EPI_ISL_7337538, EPI_ISL_7337539, EPI_ISL_7337540, EPI_ISL_7337541, EPI_ISL_7337542, EPI_ISL_7337543, EPI_ISL_7337544, EPI_ISL_7337545, EPI_ISL_7337546, EPI_ISL_7337547, EPI_ISL_7337548, EPI_ISL_7337549, EPI_ISL_7337550, EPI_ISL_7337551, EPI_ISL_7337552, EPI_ISL_7337553, EPI_ISL_7337558, EPI_ISL_7337559, EPI_ISL_7337560, EPI_ISL_7337561, EPI_ISL_7337562, EPI_ISL_7337563, EPI_ISL_7337564                                   | see above                                                                                                      | Chris Hani Baragwanath Laboratory                                                                          | National Institute for Communicable Diseases of the National Health Laboratory Service                                                                                                                                                                                                                                                                                                                                                                                                  | Amoako DG; Bhiman JN; Everatt J; Ismail A; Mahlangu B; Mnguni A; Mohale T; Ntuli N; Scheepers C                                             |
| EPI_ISL_7154390                                                                                                                                                                                                                                                                                                                                                                                                                                                                                                                                                                                                                                                                                                                                                            | Clina-Lancet                                                                                                   | National Reference Laboratory, Nigeria Centre for Disease Control                                          | Catherine Okoi; Chimaobi Chukwu; Dr Ifedayo Adetifa; Dr Ndodo Nnaemeka; Dr Omoare Adesuyi; Nwando Mba; Olajumoke Babatunde; Olusola Anuoluwapo Akanbi; Oyeronke Ayansola                                                                                                                                                                                                                                                                                                                |                                                                                                                                             |
| EPI_ISL_7265967, EPI_ISL_7265976, EPI_ISL_7265979, EPI_ISL_7266027, EPI_ISL_7266045, EPI_ISL_7266056, EPI_ISL_7266083, EPI_ISL_7266160                                                                                                                                                                                                                                                                                                                                                                                                                                                                                                                                                                                                                                     | see above                                                                                                      | Clinical Microbiology Laboratory, Tel Aviv Sourasky Medical Center                                         | Clinical Microbiology Laboratory, Tel Aviv Sourasky Medical Center                                                                                                                                                                                                                                                                                                                                                                                                                      | Alon Ziv; Amos Adler; Katya Levysky; Lior Handler; Ora Halutz                                                                               |
| EPI_ISL_7042161, EPI_ISL_7042168, EPI_ISL_7462220, EPI_ISL_7462233, EPI_ISL_7462310, EPI_ISL_7462311, EPI_ISL_7462312                                                                                                                                                                                                                                                                                                                                                                                                                                                                                                                                                                                                                                                      | see above                                                                                                      | Clinical Virology                                                                                          | Clinical Bacteriology, University Hospital Basel                                                                                                                                                                                                                                                                                                                                                                                                                                        | Adrian Egli; Alfredo Mari; Fanny Wegner; Hans Hirsch; Helena MB Seth-Smith; Julia Bielicki; Karoline Leuzinger; Manuel Battegay; Tim Roloff |
| EPI_ISL_7373598                                                                                                                                                                                                                                                                                                                                                                                                                                                                                                                                                                                                                                                                                                                                                            | Clinical Virology, Children's Hospital Los Angeles                                                             | Clinical Virology, Children's Hospital Los Angeles                                                         | Alexander Judkins; Cheryl Pool; Javier Mestas; Jennifer Dien Bard; John Fissele; Maurice O'Gorman                                                                                                                                                                                                                                                                                                                                                                                       |                                                                                                                                             |
| EPI_ISL_7462438                                                                                                                                                                                                                                                                                                                                                                                                                                                                                                                                                                                                                                                                                                                                                            | Cliniques universitaires Saint-Luc                                                                             | UCLouvain/IREC/MBLG-CTMA                                                                                   | Benoit Kabamba Mukadi; Bertrand Bearzatto; Jean-Luc Gala; Nicolas Pinte; Paul Blanpain; Simon Oph6lie; Valentin Coste                                                                                                                                                                                                                                                                                                                                                                   |                                                                                                                                             |
| EPI_ISL_6951145                                                                                                                                                                                                                                                                                                                                                                                                                                                                                                                                                                                                                                                                                                                                                            | Color Genomics                                                                                                 | Chiu Laboratory, University of California, San Francisco                                                   | Alicia Sotomayor-Gonzalez; Alicia Zhou; Amy Garlin; Charles Chiu; Darpun Sachdev; Katherine Hernandez; Scott Topper; Susan Philip; Venice Servellita; Yueyuan Zhang                                                                                                                                                                                                                                                                                                                     |                                                                                                                                             |
| EPI_ISL_7010485                                                                                                                                                                                                                                                                                                                                                                                                                                                                                                                                                                                                                                                                                                                                                            | Colorado Department of Public Health and Environment                                                           | Colorado Department of Public Health and Environment                                                       | Alexandria Rossheim; Diana Ir; Emily A. Travanty; Laura Bankers; Mandy Waters; Michael A. Martin; Molly C. Hetherington-Rauth; Sarah Elizabeth Totten; Shannon R. Matzinger                                                                                                                                                                                                                                                                                                             |                                                                                                                                             |
| EPI_ISL_7451063, EPI_ISL_7451073, EPI_ISL_7451079, EPI_ISL_7451089                                                                                                                                                                                                                                                                                                                                                                                                                                                                                                                                                                                                                                                                                                         | Cruz Vermelha Portuguesa                                                                                       | Instituto Nacional de Saude (INSA)                                                                         | Borges et al                                                                                                                                                                                                                                                                                                                                                                                                                                                                            |                                                                                                                                             |
| EPI_ISL_7062087, EPI_ISL_7063588, EPI_ISL_7272249, EPI_ISL_7514034, EPI_ISL_7514991, EPI_ISL_7515043, EPI_ISL_7515374, EPI_ISL_7515374, EPI_ISL_7516043, EPI_ISL_7517471, EPI_ISL_7517646, EPI_ISL_7518103, EPI_ISL_7518795, EPI_ISL_7520214, EPI_ISL_7520543, EPI_ISL_7520819, EPI_ISL_7523657, EPI_ISL_7525859, EPI_ISL_7526218, EPI_ISL_7528707, EPI_ISL_7529040, EPI_ISL_7529817, EPI_ISL_7530609, EPI_ISL_7532336, EPI_ISL_7532391, EPI_ISL_7533005, EPI_ISL_7534407, EPI_ISL_7534541                                                                                                                                                                                                                                                                                 | see above                                                                                                      | Department of Bacteria, Parasites and Fungi, Statens Serum Institut, Copenhagen, Denmark                   | Statens Serum Institut Bioinformatics and Microbial Genomics                                                                                                                                                                                                                                                                                                                                                                                                                            | Danish Covid-19 Genome Consortium                                                                                                           |
| EPI_ISL_7042669                                                                                                                                                                                                                                                                                                                                                                                                                                                                                                                                                                                                                                                                                                                                                            | Department of Clinical Microbiology                                                                            | GIGA Medical Genomics                                                                                      | Bouchra Boujemla; Claire Gourzon6s; C6cile Meex; Keith Durkin; Laurent Gillet; Maria Artes; Marie-Pierre Hayette; Nadine Cambisano; Nathalie Renotte; Olivier Ek; S6bastien Bontems; Vincent Bours                                                                                                                                                                                                                                                                                      |                                                                                                                                             |
| EPI_ISL_7512899, EPI_ISL_7520649, EPI_ISL_7531709, EPI_ISL_7533537, EPI_ISL_7533749                                                                                                                                                                                                                                                                                                                                                                                                                                                                                                                                                                                                                                                                                        | Department of Clinical Microbiology, Odense University Hospital, Odense, Denmark                               | Statens Serum Institut Bioinformatics and Microbial Genomics                                               | Danish Covid-19 Genome Consortium                                                                                                                                                                                                                                                                                                                                                                                                                                                       |                                                                                                                                             |
| EPI_ISL_7192723, EPI_ISL_7192733, EPI_ISL_7192734, EPI_ISL_7485700                                                                                                                                                                                                                                                                                                                                                                                                                                                                                                                                                                                                                                                                                                         | Department of Health Technology and Informatics, The Hong Kong Polytechnic University                          | Department of Health Technology and Informatics, The Hong Kong Polytechnic University                      | Alan Ka-Lun Wu; Alex Yat-Man Ho; Barry Kin-Chung Wong; Chloe Toi-Mei Chan; David Ho-Keung Shum; Denise Sze-Hang Wong; Gilman Kit-Hang Siu; Hiu-Yin Lao; Hoi-Ching Jim; Ivan Tak-Fai Wong; Jake Siu-Lun Leung; Kam-Tong Yip; Kenneth Siu-Sing Leung; Kingsley King-Gee Tam; Kitty Sau-Chun Fung; Kristine Luk; Lam-Kwong Lee; Miranda Chong-Yee Yau; Sandy Ka-Yee Chau; Shea Ping Yip; Tak-Lun Que; Timothy Ting-Leung Ng; Wing Cheong Yam; Wing-Hei Lo; Wing-Kin To; Yvette Wai-Man Lai |                                                                                                                                             |
| EPI_ISL_6841980, EPI_ISL_6841981, EPI_ISL_7138045, EPI_ISL_7357684, EPI_ISL_7385702                                                                                                                                                                                                                                                                                                                                                                                                                                                                                                                                                                                                                                                                                        | Department of Microbiology, The University of Hong Kong                                                        | Department of Microbiology, The University of Hong Kong                                                    | Kelvin K.W. To; Kwok-Yung Yuen                                                                                                                                                                                                                                                                                                                                                                                                                                                          |                                                                                                                                             |
| EPI_ISL_7201444                                                                                                                                                                                                                                                                                                                                                                                                                                                                                                                                                                                                                                                                                                                                                            | Department of Virology and Immunology, University of Helsinki and Helsinki University Hospital, HUSLAB Finland | Department of Virology, Faculty of Medicine, University of Helsinki, Helsinki, Finland                     | Hanna Jarva; Hanna Liimatainen; Hanna Vauhkonen; Hussein Alburkat; Maija Lappalainen; Mert Erdin; Olli Vapalahti; Phuoc Truong; Ravi Kant; Sari Hannula; Satu Kurkela; Teemu Smura                                                                                                                                                                                                                                                                                                      |                                                                                                                                             |
| EPI_ISL_6972689                                                                                                                                                                                                                                                                                                                                                                                                                                                                                                                                                                                                                                                                                                                                                            | Dept. of Laboratory Medicine                                                                                   | Dept. of Laboratory Medicine                                                                               | Claudia Weber; Fabian Konig; Harald Esterbauer; Oswald Wagner; Robert Strassi; Sabina Plumer; Victoria Six                                                                                                                                                                                                                                                                                                                                                                              |                                                                                                                                             |

|                                                                                                                                                                                                                                                                                                                                                                                                                                                                                                                                                                                                                                                                                                                                                                            |                                                                                                                                        |                                                                                                                                            |                                                                                                                                                                                                                                                                                                                                                                                                             |  |
|----------------------------------------------------------------------------------------------------------------------------------------------------------------------------------------------------------------------------------------------------------------------------------------------------------------------------------------------------------------------------------------------------------------------------------------------------------------------------------------------------------------------------------------------------------------------------------------------------------------------------------------------------------------------------------------------------------------------------------------------------------------------------|----------------------------------------------------------------------------------------------------------------------------------------|--------------------------------------------------------------------------------------------------------------------------------------------|-------------------------------------------------------------------------------------------------------------------------------------------------------------------------------------------------------------------------------------------------------------------------------------------------------------------------------------------------------------------------------------------------------------|--|
| EPI_ISL_7464539,<br>EPI_ISL_7464543                                                                                                                                                                                                                                                                                                                                                                                                                                                                                                                                                                                                                                                                                                                                        | Dept. of Microbiology and Infection Control, Akershus University Hospital HF                                                           | Dept. of Microbiology and Infection Control, Akershus University Hospital HF                                                               | Alexander Hesselberg Løvestad; Hege Vangstein Aamot                                                                                                                                                                                                                                                                                                                                                         |  |
| EPI_ISL_7121080                                                                                                                                                                                                                                                                                                                                                                                                                                                                                                                                                                                                                                                                                                                                                            | Diagnofirm Medical Laboratories                                                                                                        | Botswana Harvard HIV Reference Laboratory                                                                                                  | Boitumelo Zuze; Botshelo Radibe; Dorcas Maruapula; Joseph Makhema; Keoratlhe Ntshambiwa; Kgomoiso Moruisi; Legodile Kooepile; Mosepele Mosepele; Mphaphi B. Mbulawa; Ontlametse T. Bareng; Pamela Smith-Lawrence; Roger Shapiro; Sefetogi Ramaologa; Shahin Lockman; Sikhulile Moyo; Simani Gaseitsiwe; Thongbotho Mphoyakgosi; Wonderful T. Choga                                                          |  |
| EPI_ISL_6959926, EPI_ISL_6959935, EPI_ISL_6959993, EPI_ISL_7406117, EPI_ISL_7406118, EPI_ISL_7406119, EPI_ISL_7406124, EPI_ISL_7406125, EPI_ISL_7406126                                                                                                                                                                                                                                                                                                                                                                                                                                                                                                                                                                                                                    |                                                                                                                                        |                                                                                                                                            |                                                                                                                                                                                                                                                                                                                                                                                                             |  |
| see above                                                                                                                                                                                                                                                                                                                                                                                                                                                                                                                                                                                                                                                                                                                                                                  | Division of Emerging Infectious Diseases, Bureau of Infectious Diseases Diagnosis Control, Korea Disease Control and Prevention Agency | Division of Emerging Infectious Diseases, Bureau of Infectious Diseases Diagnosis Control, Korea Disease Control and Prevention Agency     | Ae Kyung Park; Chae Young Lee; Eun-jin Kim; Heui Man Kim; Hyuck Jin Lee; Il-Hwan Kim; Jeong-Ah Kim; Jeong-Min Kim                                                                                                                                                                                                                                                                                           |  |
| EPI_ISL_6842156, EPI_ISL_6842159, EPI_ISL_6842162, EPI_ISL_6842163, EPI_ISL_6842165, EPI_ISL_7452732, EPI_ISL_7452733, EPI_ISL_7452734, EPI_ISL_7452735, EPI_ISL_7452736, EPI_ISL_7452737, EPI_ISL_7452738, EPI_ISL_7452741, EPI_ISL_7452742, EPI_ISL_7452744, EPI_ISL_7452745, EPI_ISL_7452746, EPI_ISL_7452749, EPI_ISL_7452750, EPI_ISL_7452751, EPI_ISL_7452758, EPI_ISL_7452761, EPI_ISL_7452762, EPI_ISL_7452763, EPI_ISL_7452764, EPI_ISL_7452765, EPI_ISL_7452771, EPI_ISL_7452780, EPI_ISL_7452781, EPI_ISL_7452782, EPI_ISL_7452783, EPI_ISL_7452785, EPI_ISL_7452792, EPI_ISL_7452793, EPI_ISL_7452794, EPI_ISL_7452795, EPI_ISL_7452796, EPI_ISL_7452797, EPI_ISL_7452798, EPI_ISL_7452799, EPI_ISL_7452800, EPI_ISL_7456525, EPI_ISL_7456526, EPI_ISL_7544929 |                                                                                                                                        |                                                                                                                                            |                                                                                                                                                                                                                                                                                                                                                                                                             |  |
| see above                                                                                                                                                                                                                                                                                                                                                                                                                                                                                                                                                                                                                                                                                                                                                                  | Division of Medical Virology, National Health Laboratory Service (NHLS), Tygerberg Hospital / Stellenbosch University                  | Division of Medical Virology, National Health Laboratory Service (NHLS), Tygerberg Hospital / Stellenbosch University                      | Gert van Zyl; Kamela Mahlakwane; Shannon Wilson; Susan Engelbrecht; Tania Stander; Tongai Maponga; Wolfgang Preiser                                                                                                                                                                                                                                                                                         |  |
| EPI_ISL_7062590, EPI_ISL_7506397, EPI_ISL_7506422, EPI_ISL_7506490                                                                                                                                                                                                                                                                                                                                                                                                                                                                                                                                                                                                                                                                                                         | Dr. Risch Ostschweiz AG                                                                                                                | Dr Risch Laboratory                                                                                                                        | Dominique Fabien Hilti; Faina Wehrli; Lorenz Risch; Martin Risch; Nadia Wohlwend; Sinem Kas; Thomas Bodmer                                                                                                                                                                                                                                                                                                  |  |
| EPI_ISL_7469070                                                                                                                                                                                                                                                                                                                                                                                                                                                                                                                                                                                                                                                                                                                                                            | Dutch COVID-19 response team                                                                                                           | Medical Microbiology, Maastricht University Medical Centre                                                                                 | Brian van der Veer*; Carmen Reumkens; Christian Hoebe; Erik Beuken; Jozef Dingemans*; Lieke van Alphen; Paul Savelkoul                                                                                                                                                                                                                                                                                      |  |
| EPI_ISL_6841607, EPI_ISL_6841608, EPI_ISL_6841609, EPI_ISL_6841610, EPI_ISL_6841611, EPI_ISL_6841612, EPI_ISL_6841613, EPI_ISL_6841614, EPI_ISL_6841615, EPI_ISL_6841616, EPI_ISL_6841617, EPI_ISL_6841618, EPI_ISL_6841619, EPI_ISL_7407657, EPI_ISL_7471412, EPI_ISL_7471413, EPI_ISL_7471451, EPI_ISL_7471520, EPI_ISL_7471548, EPI_ISL_7471549, EPI_ISL_7471975                                                                                                                                                                                                                                                                                                                                                                                                        |                                                                                                                                        |                                                                                                                                            |                                                                                                                                                                                                                                                                                                                                                                                                             |  |
| see above                                                                                                                                                                                                                                                                                                                                                                                                                                                                                                                                                                                                                                                                                                                                                                  | Dutch COVID-19 response team                                                                                                           | National Institute for Public Health and the Environment (RIVM)                                                                            | Adam Meijer; AnneMarie van den Brandt; Annelies Kroneman; Bas van der Veer; Chantal Reusken; Dennis Schmitz; Dirk Eggink; Florian Zwagemaker; Harry Vennema; Ivo van Walbe; Jeroen Cremer; Jil Kocken; Karim Hajji; Kim Frenkens; Linda van Someren; Lisa Wijsman; Lynn Aarts; Rianne Jaarsma; Sanne Bos; Sharon van den Brink; Stijn van Rossum; on behalf of the national COVID-19 response team          |  |
| EPI_ISL_6826713, EPI_ISL_6826714, EPI_ISL_6989667, EPI_ISL_7015154, EPI_ISL_7160041, EPI_ISL_7160042                                                                                                                                                                                                                                                                                                                                                                                                                                                                                                                                                                                                                                                                       | Dynacare                                                                                                                               | National Microbiology Laboratory (NML)                                                                                                     | Anna Majer; Anneliese Landgraff; CanCOGeN's metadata curation team; Darian Hole; Dynacare Brampton COVID-19 Diagnostic team; Elsie Grudski; Gary Van Domselaar; Gordon Jolly; Grace Seo; Jennifer Tanner; Madison Chapel; Morag Graham; Natalie Knox; Nathalie Bastien; Philip Mabon; Public Health Agency of Canada CanCOGeN team; Rhiannon Huzarewich; Russell Mandes; Shari Tyson; Timothy Booth; Yan Li |  |
| EPI_ISL_6949582, EPI_ISL_7123666, EPI_ISL_7123680, EPI_ISL_7123692, EPI_ISL_7330020, EPI_ISL_7330021, EPI_ISL_7330161, EPI_ISL_7464335, EPI_ISL_7464340, EPI_ISL_7464346                                                                                                                                                                                                                                                                                                                                                                                                                                                                                                                                                                                                   |                                                                                                                                        |                                                                                                                                            |                                                                                                                                                                                                                                                                                                                                                                                                             |  |
| see above                                                                                                                                                                                                                                                                                                                                                                                                                                                                                                                                                                                                                                                                                                                                                                  | Edmonton Provincial Lab                                                                                                                | Alberta Precision Labs (APL)                                                                                                               | Buss; Croxen M; Deo A; Dieu P; E; Ferrato C; Gill K; Khan F; Koleva P; Li V; Lloyd C; Lynch T; Ma R; Murphy S; Pabbaraju K; Shokoples S; Thayer J; Tipples G; Whitehouse M; Wong A; Yu C; Zelyas N                                                                                                                                                                                                          |  |
| EPI_ISL_7547732, EPI_ISL_7547733                                                                                                                                                                                                                                                                                                                                                                                                                                                                                                                                                                                                                                                                                                                                           | Everight diagnostics (Abuja)                                                                                                           | National Reference Laboratory, Nigeria Centre for Disease Control                                                                          | Catherine Okoi; Chimaobi Chukwu; Dr Ifedayo Adetifa; Dr Ndodo Nnaemeka; Dr Omoare Adesuyi; Nwando Mba; Olajumoke Babatunde; Olusola Anuoluwapo Akanbi; Oyeronke Ayansola                                                                                                                                                                                                                                    |  |
| EPI_ISL_7313687                                                                                                                                                                                                                                                                                                                                                                                                                                                                                                                                                                                                                                                                                                                                                            | Florida Bureau of Public Health Laboratories                                                                                           | Florida Bureau of Public Health Laboratories                                                                                               | Jason Blanton; Namratha Tarigopula; Sarah Schmedes; Tiffany Splatt                                                                                                                                                                                                                                                                                                                                          |  |
| EPI_ISL_7154399, EPI_ISL_7497709, EPI_ISL_7497711, EPI_ISL_7497739, EPI_ISL_7497740, EPI_ISL_7497741, EPI_ISL_7497742, EPI_ISL_7497767                                                                                                                                                                                                                                                                                                                                                                                                                                                                                                                                                                                                                                     |                                                                                                                                        |                                                                                                                                            |                                                                                                                                                                                                                                                                                                                                                                                                             |  |
| see above                                                                                                                                                                                                                                                                                                                                                                                                                                                                                                                                                                                                                                                                                                                                                                  | Fulgent Genetics                                                                                                                       | Centers for Disease Control and Prevention Division of Viral Diseases, Pathogen Discovery                                                  | Becky Tsai; Benafsh Sapra; Benjamin Rambo-Martin; Christopher Gulvick; Clinton Paden; Dakota Howard; Dhvani Batra; Doreen Ng; Duncan MacCannell; Erisa Sula; Harry Gao; James Xie; Jason Caravas; John Gao; Joseph Fierro; Kristine Lacek; Matthew Schmerer; Mickey Li; Peter Cook; Scott Sammons; Shatavia Morrison; Tymeckia Kendall; Victoria Caban Figueroa; Yan Meng; Yvette Unoarumhi                 |  |
| EPI_ISL_6971572, EPI_ISL_6989155, EPI_ISL_7248772, EPI_ISL_7248778, EPI_ISL_7248797, EPI_ISL_7248805, EPI_ISL_7248814, EPI_ISL_7248821, EPI_ISL_7470261                                                                                                                                                                                                                                                                                                                                                                                                                                                                                                                                                                                                                    |                                                                                                                                        |                                                                                                                                            |                                                                                                                                                                                                                                                                                                                                                                                                             |  |
| see above                                                                                                                                                                                                                                                                                                                                                                                                                                                                                                                                                                                                                                                                                                                                                                  | Furst Medical Laboratory                                                                                                               | Norwegian Institute of Public Health, Department of Virology                                                                               | Atiya R Ali; Debeck Nadia; Engebretsen Serina Beate; Garcia Llorente Ignacio; Hilde Elshaug; Hilde Vollen; Jon Bråte; Kamilla Heddeland Instefjord; Karoline Bragstad; Kathrine Stene-Johansen; Line Victoria Moen; Marie Paulsen Madsen; Olav Hungnes; Pedersen Benedikte Nevjen; Rasmus Riis Kopperud                                                                                                     |  |
| EPI_ISL_7473158, EPI_ISL_7173962                                                                                                                                                                                                                                                                                                                                                                                                                                                                                                                                                                                                                                                                                                                                           | GA Department of Public Health GENEPATH                                                                                                | GA Department of Public Health NCL, Pune                                                                                                   | Aliyah Fields; Jonathan Edwards; Sharmila Talekar; Stacy Reeves; Taylor Smith; Tonia Parrott                                                                                                                                                                                                                                                                                                                |  |
| EPI_ISL_7313494, EPI_ISL_7478195, EPI_ISL_7478220, EPI_ISL_7478233                                                                                                                                                                                                                                                                                                                                                                                                                                                                                                                                                                                                                                                                                                         | GH A.CHENEVIER-H.MONDOR                                                                                                                | Department of Virology, Henri Mondor University Hospital, Assistance Publique Hôpitaux de Paris, Université Paris-Est Créteil, INSERM U955 | Ajinkya Khilari; Anu Raghunathan; Bhagyashree Litkar; Dhanasekaran Shanmugam; Divya Niveditha; Jugal Kanekar; Shikha Takur                                                                                                                                                                                                                                                                                  |  |
| EPI_ISL_6892613, EPI_ISL_6892620, EPI_ISL_6892631, EPI_ISL_6892639, EPI_ISL_6892644, EPI_ISL_6892650, EPI_ISL_6892653, EPI_ISL_6892659, EPI_ISL_6892661, EPI_ISL_6892665, EPI_ISL_6892674, EPI_ISL_6892683, EPI_ISL_6892693                                                                                                                                                                                                                                                                                                                                                                                                                                                                                                                                                |                                                                                                                                        |                                                                                                                                            | Alexandre Soulier; Christophe Rodriguez; Elisabeth Trawinski; Guillaume Gricourt; Jean-Michel Pawlowsky; Melissa N'Debi; Slim Fourati; Vanessa Demontant                                                                                                                                                                                                                                                    |  |
| see above                                                                                                                                                                                                                                                                                                                                                                                                                                                                                                                                                                                                                                                                                                                                                                  | Germano de Sousa                                                                                                                       | Instituto Nacional de Saude (INSA)                                                                                                         | Borges et al                                                                                                                                                                                                                                                                                                                                                                                                |  |
| EPI_ISL_7545349, EPI_ISL_7545360, EPI_ISL_7545585                                                                                                                                                                                                                                                                                                                                                                                                                                                                                                                                                                                                                                                                                                                          | Gibraltar Health Authority Lab                                                                                                         | Gibraltar Health Authority Covid-19 Laboratory                                                                                             | Bruna Martins; Dr Daniel Cassaglia; Dr Martyn Bell; Dr Nicholas Cortes; Dr Zoe Vincent; Sofia Lavelle                                                                                                                                                                                                                                                                                                       |  |
| EPI_ISL_7549110, EPI_ISL_7549111                                                                                                                                                                                                                                                                                                                                                                                                                                                                                                                                                                                                                                                                                                                                           | Gravity Diagnostics, LLC                                                                                                               | Gravity Diagnostics, LLC                                                                                                                   | Gravity Diagnostics                                                                                                                                                                                                                                                                                                                                                                                         |  |
| EPI_ISL_7544692, EPI_ISL_7543874, EPI_ISL_7544059, EPI_ISL_7544158, EPI_ISL_7544262, EPI_ISL_7544652                                                                                                                                                                                                                                                                                                                                                                                                                                                                                                                                                                                                                                                                       | Great Brak River Clinic wc GBC<br>Groote Schuur Hospital wc GSH                                                                        | NHLS/UCT<br>NHLS/UCT                                                                                                                       | Arash Iranzadeh; Bruna Galvao; Carolyn Williamson; Deelan Doolabh; Diana Hardie; Gert Marais; Innocent Mudau; Luicer Olubayo; Lynn Tyers; Marvin Hsiao; Nokuzola Mbhele; Rageema Joseph; Stephen Korsman                                                                                                                                                                                                    |  |
| EPI_ISL_6913917                                                                                                                                                                                                                                                                                                                                                                                                                                                                                                                                                                                                                                                                                                                                                            | Grupo CR Diagnosticos                                                                                                                  | Instituto Adolfo Lutz Strategic Laboratory                                                                                                 | Claudio Tavares Sacchi; Karoline Rodrigues Campos                                                                                                                                                                                                                                                                                                                                                           |  |
| EPI_ISL_6900139, EPI_ISL_6900141, EPI_ISL_6900142, EPI_ISL_6900143                                                                                                                                                                                                                                                                                                                                                                                                                                                                                                                                                                                                                                                                                                         | HELEN JOSEPH LABORATORY                                                                                                                | National Institute for Communicable Diseases of the National Health Laboratory Service                                                     | Amoako DG; Bhiman JN; Everatt J; Ismail A; Mahlangu B; Mnguni A; Mohale T; Ntuli N; Scheepers C                                                                                                                                                                                                                                                                                                             |  |
| EPI_ISL_6698790, EPI_ISL_7045214                                                                                                                                                                                                                                                                                                                                                                                                                                                                                                                                                                                                                                                                                                                                           | HOME QUARANTINE TASKFORCE<br>HOSPITAL UNIVERSITARI DE BELLVITGE                                                                        | Hong Kong Department of Health Microbiology Department                                                                                     | Alan K.L. Tsang; Edman T.K. Lam; Ken H.L. Ng; Peter C.W. Yip; Rickjason C.W. Chan                                                                                                                                                                                                                                                                                                                           |  |
| EPI_ISL_7470201                                                                                                                                                                                                                                                                                                                                                                                                                                                                                                                                                                                                                                                                                                                                                            | Haukeland University Hospital, Dept. of Microbiology                                                                                   | Norwegian Institute of Public Health, Department of Virology                                                                               | Aida Gonzalez-Diaz; Anna Carrera-Salinas Yolanda Hernandez; Carmen Ardanuy; Jordi Camara; Jordi Niubó; Laura Calatayud; M Angeles Dominguez; Sara Marti                                                                                                                                                                                                                                                     |  |
| EPI_ISL_7142185, EPI_ISL_7142260, EPI_ISL_7184579                                                                                                                                                                                                                                                                                                                                                                                                                                                                                                                                                                                                                                                                                                                          | Health Services Laboratories                                                                                                           | Wellcome Sanger Institute for the COVID-19 Genomics UK (COG-UK) Consortium                                                                 | Atiya R Ali; Debeck Nadia; Engebretsen Serina Beate; Garcia Llorente Ignacio; Hilde Elshaug; Hilde Vollen; Jon Bråte; Kamilla Heddeland Instefjord; Karoline Bragstad; Kathrine Stene-Johansen; Line Victoria Moen; Marie Paulsen Madsen; Olav Hungnes; Pedersen Benedikte Nevjen; Rasmus Riis Kopperud                                                                                                     |  |
| EPI_ISL_7544466                                                                                                                                                                                                                                                                                                                                                                                                                                                                                                                                                                                                                                                                                                                                                            | Helderberg Hospital wc HHH                                                                                                             | NHLS/UCT                                                                                                                                   | Arash Iranzadeh; Bruna Galvao; Carolyn Williamson; Deelan Doolabh; Diana Hardie; Gert Marais; Innocent Mudau; Luicer Olubayo; Lynn Tyers; Marvin Hsiao; Nokuzola Mbhele; Rageema Joseph; Stephen Korsman                                                                                                                                                                                                    |  |
| EPI_ISL_7337440, EPI_ISL_7337441, EPI_ISL_7337442, EPI_ISL_7337443, EPI_ISL_7337444, EPI_ISL_7337445, EPI_ISL_7337446, EPI_ISL_7337447, EPI_ISL_7337448, EPI_ISL_7337449, EPI_ISL_7337450, EPI_ISL_7337451, EPI_ISL_7337452, EPI_ISL_7337453, EPI_ISL_7337454, EPI_ISL_7337455, EPI_ISL_7337458, EPI_ISL_7337460, EPI_ISL_7337461, EPI_ISL_7337462                                                                                                                                                                                                                                                                                                                                                                                                                         |                                                                                                                                        |                                                                                                                                            |                                                                                                                                                                                                                                                                                                                                                                                                             |  |
| see above                                                                                                                                                                                                                                                                                                                                                                                                                                                                                                                                                                                                                                                                                                                                                                  | Helen Joseph Laboratory                                                                                                                | National Institute for Communicable Diseases of the National Health Laboratory Service                                                     | Amoako DG; Bhiman JN; Everatt J; Ismail A; Mahlangu B; Mnguni A; Mohale T; Ntuli N; Scheepers C                                                                                                                                                                                                                                                                                                             |  |
| EPI_ISL_7497723                                                                                                                                                                                                                                                                                                                                                                                                                                                                                                                                                                                                                                                                                                                                                            | Helix                                                                                                                                  | Centers for Disease Control and Prevention Division of Viral Diseases, Pathogen Discovery                                                  | Benjamin Rambo-Martin; Christopher Gulvick; Clinton Paden; Dakota Howard; Dhvani Batra; Duncan MacCannell; Erisa Sula; Helix CA; Jason Caravas; Kristine Lacek; Matthew Schmerer; Peter Cook; Scott Sammons; Shatavia Morrison; Tymeckia Kendall; Victoria Caban Figueroa; Yvette Unoarumhi                                                                                                                 |  |
| EPI_ISL_7265236, EPI_ISL_7265237, EPI_ISL_7462215                                                                                                                                                                                                                                                                                                                                                                                                                                                                                                                                                                                                                                                                                                                          | Histopath                                                                                                                              | NSW Health Pathology - Institute of Clinical Pathology and Medical Research; Westmead Hospital; University of Sydney                       | Arnott A.; Draper J.; Gall M.; Martinez E.; Rockett R.; Sintchenko V.; on behalf of ICPMR                                                                                                                                                                                                                                                                                                                   |  |
| EPI_ISL_6590782, EPI_ISL_6832108                                                                                                                                                                                                                                                                                                                                                                                                                                                                                                                                                                                                                                                                                                                                           | Home Quarantine Taskforce                                                                                                              | Hong Kong Department of Health                                                                                                             | Alan K.L. Tsang; Edman T.K. Lam; Ken H.L. Ng; Peter C.W. Yip; Rickjason C.W. Chan                                                                                                                                                                                                                                                                                                                           |  |

|                                                                                                                                                                                                                                                                                                                                                                                      |                                                                                                              |                                                                                                                              |                                                                                                                                                                                                                                                                                                                                                                                                                                                                                                                |
|--------------------------------------------------------------------------------------------------------------------------------------------------------------------------------------------------------------------------------------------------------------------------------------------------------------------------------------------------------------------------------------|--------------------------------------------------------------------------------------------------------------|------------------------------------------------------------------------------------------------------------------------------|----------------------------------------------------------------------------------------------------------------------------------------------------------------------------------------------------------------------------------------------------------------------------------------------------------------------------------------------------------------------------------------------------------------------------------------------------------------------------------------------------------------|
| EPI_ISL_6716990,<br>EPI_ISL_6716902                                                                                                                                                                                                                                                                                                                                                  | Hong Kong Department of Health                                                                               | School of Public Health, The University of Hong Kong                                                                         | Dominic N.C. Tsang; Haogao Gu; Leo L.M. Poon; Malik Peiris                                                                                                                                                                                                                                                                                                                                                                                                                                                     |
| EPI_ISL_7373061,<br>EPI_ISL_7373165,<br>EPI_ISL_7373230                                                                                                                                                                                                                                                                                                                              | Hospital General Universitario Albacete                                                                      | Hospital General Universitario Albacete                                                                                      | Caridad Sainz de Baranda Camino; Lorena Robles-Fonseca                                                                                                                                                                                                                                                                                                                                                                                                                                                         |
| EPI_ISL_6851526,<br>EPI_ISL_6902675,<br>EPI_ISL_6971860,<br>EPI_ISL_7042252                                                                                                                                                                                                                                                                                                          | Hospital General Universitario Gregorio Marañón                                                              | Hospital General Universitario Gregorio Marañón                                                                              | Cristina Rodriguez-Grande; Darío García de Viedma; Jorge Rodríguez-Grande; Julia Suárez; Laura Pérez-Lago; Marta Herranz Martín; Patricia Muñoz; Pedro Sola Campoy; Pilar Catalán; Sergio Buenestado Serrano; Víctor Manuel de la Cueva                                                                                                                                                                                                                                                                        |
| EPI_ISL_7204336                                                                                                                                                                                                                                                                                                                                                                      | Hospital Universitari Dr. Josep Trueta                                                                       | Institut d'Investigació Biomèdica de Girona   Hospital Universitari Dr. Josep Trueta                                         | Bernat del Olmo; Mel·lina Pinsach; Meritxell Deulofeu; Nuria Esther Neto; Paula Costa                                                                                                                                                                                                                                                                                                                                                                                                                          |
| EPI_ISL_7050911,<br>EPI_ISL_7050918,<br>EPI_ISL_7406515                                                                                                                                                                                                                                                                                                                              | Hospital Universitari Vall d'Hebron - Vall d'Hebron Institut de Recerca                                      | Hospital Universitari Vall d'Hebron - Vall d'Hebron Institut de Recerca                                                      | Alejandra González-Sánchez; Andrés Antón; Ariadna Rando; Carla Castillo; Cristina Andrés; Damir García-Cehic; Josep Quer; Juliana Esperalba; Karen García; María Carmen Martín; María Gema Codina; María Piñana; Rodrigo Vázquez; Tomàs Pumarola                                                                                                                                                                                                                                                               |
| EPI_ISL_7277268<br>EPI_ISL_7329633                                                                                                                                                                                                                                                                                                                                                   | Hospital Universitario Son Espases<br>Hospital Universitario de Guadalajara                                  | Hospital Universitario Son Espases<br>Hospital General Universitario de Ciudad Real                                          | Dr. Antonio Oliver; Dr. Carla López-Causapé; Dr. Gabriel Cabot; Hospital Universitario Son Espases; on behalf of Servicio de Microbiología<br>Cristina Colmenarejo; José Martínez-Alarcón; Lidia García-Agudo; Marta Torres-Narbona; Soledad Illescas Fernández-Bermejo                                                                                                                                                                                                                                        |
| EPI_ISL_7156454                                                                                                                                                                                                                                                                                                                                                                      | Hospital Ángeles Lomas                                                                                       | Instituto de diagnóstico y Referencia Epidemiológicos (INDRE)                                                                | Abril Rodriguez-Maldonado; Ariadna Medina-Benítez; Armando Rojo; Claudia Wong-Arambula; Ernesto Ramirez-Gonzalez; Fernando Gonzalez-Dominguez; Gisela Barrera-Badillo; Irma Lopez-Martinez; Joaquin Quiroz-Mercado; Leonardo Medina Arias; Lucia Hernandez-Rivas; Maribel Gonzalez-Villa; Natividad Cruz-Ortiz; Pilar Escamilla Llano; Raymundo Rodríguez Sandoval; Tatiana Nunez-Garcia; Vanessa Rivero-Arredondo                                                                                             |
| EPI_ISL_7451721, EPI_ISL_7415723, EPI_ISL_7415731, EPI_ISL_7415752, EPI_ISL_7415767, EPI_ISL_7415770, EPI_ISL_7415784, EPI_ISL_7415830, EPI_ISL_7415887                                                                                                                                                                                                                              | see above                                                                                                    | Houston Methodist Hospital                                                                                                   | Ilya J. Finkelstein; James J. Davis; Jessica Cambric; Jimmy Golihar; Kristina Reppond; Layne Pruitt; Madison N. Shyer; Marcus Nguyen; Matthew Ojeda Saavedra; Paul A. Christensen; Prasanti Yerramilli; Randall J. Olsen; Robert Olson; Ryan Gadd; S. Wesley Long; Sishir Subedi; and James M. Musser                                                                                                                                                                                                          |
| EPI_ISL_7210427<br>EPI_ISL_7154340,<br>EPI_ISL_7156753,<br>EPI_ISL_7308635,<br>EPI_ISL_7308771,<br>EPI_ISL_7308875,<br>EPI_ISL_7381064                                                                                                                                                                                                                                               | Hrvatski zavod za javno zdravstvo<br>IHU Mediterranee Infection                                              | Hrvatski zavod za javno zdravstvo<br>IHU Mediterranee Infection                                                              | Anita Jurić; Dragan Jurić; Irena Tabain; Ivana Ferenčak; Josipa Kuzle; Ljiljana Žmak; Mihaela Obrovac<br>Philippe Colson et al.                                                                                                                                                                                                                                                                                                                                                                                |
| EPI_ISL_7439547, EPI_ISL_7439558, EPI_ISL_7439622, EPI_ISL_7439646, EPI_ISL_7439650, EPI_ISL_7439657, EPI_ISL_7439722, EPI_ISL_7439730, EPI_ISL_7439754, EPI_ISL_7439781, EPI_ISL_7439806, EPI_ISL_7439827, EPI_ISL_7439832, EPI_ISL_7439902, EPI_ISL_7439935                                                                                                                        | see above                                                                                                    | IMD - MVZ Labor Martinsried                                                                                                  | Robert Koch Institute                                                                                                                                                                                                                                                                                                                                                                                                                                                                                          |
| EPI_ISL_7451030,<br>EPI_ISL_7451040,<br>EPI_ISL_7451054,<br>EPI_ISL_7451096                                                                                                                                                                                                                                                                                                          | INSA                                                                                                         | Instituto Nacional de Saude (INSA)                                                                                           | Borges et al                                                                                                                                                                                                                                                                                                                                                                                                                                                                                                   |
| EPI_ISL_7496734<br>EPI_ISL_7544430                                                                                                                                                                                                                                                                                                                                                   | Idaho Bureau of Laboratories<br>Ikhwezi CDC wc IKW                                                           | Idaho Bureau of Laboratories<br>NHLS/UCT                                                                                     | "R. Beukelman; Aimee Ceniseros; Christian Loera; Christopher Ball"; Matthew Charles Burns; Robert L. Voermans<br>Arash Iranzadeh; Bruna Galvao; Carolyn Williamson; Deelan Doolabh; Diana Hardie; Gert Marais; Innocent Mudau; Luicer Olubayo; Lynn Tyers; Marvin Hsiao; Nokuzola Mbhele; Rageema Joseph; Stephen Korsman                                                                                                                                                                                      |
| EPI_ISL_7381102                                                                                                                                                                                                                                                                                                                                                                      | Indian Council of Medical Research-National Institute of Virology, Microbial Containment Complex             | Indian Council of Medical Research-National Institute of Virology, Microbial Containment Complex                             | Pragya D. Yadav                                                                                                                                                                                                                                                                                                                                                                                                                                                                                                |
| EPI_ISL_7166400<br>EPI_ISL_7497749                                                                                                                                                                                                                                                                                                                                                   | Indira Gandhi Memorial Hospital<br>Infinity Biologix                                                         | Indira Gandhi Memorial Hospital<br>Centers for Disease Control and Prevention Division of Viral Diseases, Pathogen Discovery | D. Fathmath Nazla Rafeeq; Dr. Ibrahim Afzal; Mr. Ibrahim Nishan Ahmed; Ms. Aishath Shuhudha; Ms. Aminath Shazleena Abdul Rahman<br>Benjamin Rambo-Martin; Chirayu Goswami; Christian Bixby; Christopher Gulvick; Clinton Paden; Dakota Howard; Dhwani Batra; Duncan MacCannell; Erisa Sula; Jason Caravas; Jonathan Schultz; Kristine Lacek; Matthew Schmeer; Peter Cook; Robin Grimwood; Russ Hager; Scott Sammons; Shatavia Morrison; Tymeckia Kendall; Victoria Caban Figueroa; Yihe Wang; Yvette Unoarumhi |
| EPI_ISL_7405329                                                                                                                                                                                                                                                                                                                                                                      | Inselspital Bern (Covid-Track)                                                                               | Institute for Infectious Diseases, University of Bern                                                                        | Alban Ramette; Christian Baumann; Cora Sägesser; Franziska Suter-Riniker; Loïc Borcard; Miguel A Terrazos Miani; Nicole Liechti; Pascal Bittel; Peter Keller; Sonja Gempeler; Stefan Neuenschwander; Stephen L Leib                                                                                                                                                                                                                                                                                            |
| EPI_ISL_7117396                                                                                                                                                                                                                                                                                                                                                                      | Institut für Labormedizin Mikrobiologie und Hygiene                                                          | Robert Koch Institute                                                                                                        |                                                                                                                                                                                                                                                                                                                                                                                                                                                                                                                |
| EPI_ISL_6832737                                                                                                                                                                                                                                                                                                                                                                      | Institute for Medical Virology Frankfurt                                                                     | Institute for Medical Virology Frankfurt                                                                                     | Ciesek S.; Toptan T.                                                                                                                                                                                                                                                                                                                                                                                                                                                                                           |
| EPI_ISL_6959868, EPI_ISL_6959869, EPI_ISL_6959870, EPI_ISL_6959871, EPI_ISL_6959872, EPI_ISL_6959873, EPI_ISL_6959874, EPI_ISL_7479163, EPI_ISL_7479173, EPI_ISL_7479181, EPI_ISL_7479186, EPI_ISL_7479193, EPI_ISL_7479200, EPI_ISL_7479206                                                                                                                                         | see above                                                                                                    | Institute for Medical Virology, Frankfurt                                                                                    | Ciesek S.; Toptan T.                                                                                                                                                                                                                                                                                                                                                                                                                                                                                           |
| EPI_ISL_7404462,<br>EPI_ISL_7404463                                                                                                                                                                                                                                                                                                                                                  | Institute of Epidemiology, Disease Control and Research (IEDCR)                                              | IEDCR-ideSHi Genomics Lab                                                                                                    | Firdausi Qadri; Hassan Afrad; Manjur Hossain Khan; Omar Hamza; Tahmina Shirin                                                                                                                                                                                                                                                                                                                                                                                                                                  |
| EPI_ISL_7507055                                                                                                                                                                                                                                                                                                                                                                      | Institute of Medical Science, University of Tokyo                                                            | Center for Influenza and Respiratory Virus Research, National Institute of Infectious Diseases (NIID)                        | Emi Takashita; Hideka Miura; Seiichiro Fujisaki; Yoshihiro Kawaoka; Yuko Sakai-Tagawa                                                                                                                                                                                                                                                                                                                                                                                                                          |
| EPI_ISL_6825546,<br>EPI_ISL_6902052,<br>EPI_ISL_6902053                                                                                                                                                                                                                                                                                                                              | Institute of Virology, Department of Hygiene, Microbiology and Public Health at Innsbruck Medical University | Institute of Virology, Department of Hygiene, Microbiology and Public Health at Innsbruck Medical University                 | Andreas Aufschnaiter; Barbara Falkensammer; David Bante; Dorothee von Laer; Heribert Stoiber; Lukas Perro; Stephan Amstler; Wegene Borena                                                                                                                                                                                                                                                                                                                                                                      |
| EPI_ISL_7550075                                                                                                                                                                                                                                                                                                                                                                      | Instituto Adolfo Lutz - Regional de Rio Claro                                                                | Instituto Adolfo Lutz, Interdisciplinary Procedures Center, Strategic Laboratory                                             | Claudio Tavares Sacchi; Karoline Rodrigues Campos                                                                                                                                                                                                                                                                                                                                                                                                                                                              |
| EPI_ISL_7400617                                                                                                                                                                                                                                                                                                                                                                      | Iressef Genomics lab                                                                                         | IRÉSSEF                                                                                                                      | Abdou PADANE; Ambroise AHOUIDI; Aminata DIA; Aminata MBOUP; Astou Gaye GAYE; Barada CISSE; Birahim Piere NDIAYE; Cyrille Diedhiou; Diabou Diagne; Gora LO; Khadim GUEYE; Moustapha MBOW; Nafisatou LEYE; Ndeye Coumba Toure KANE; Papa Alassane DIAW; Samba Ndiour; Seni Ndiaye; Souleymane MBOUP; Yacine DIA                                                                                                                                                                                                  |
| EPI_ISL_7160424                                                                                                                                                                                                                                                                                                                                                                      | Johns Hopkins Hospital Department of Pathology                                                               | Johns Hopkins Hospital Department of Pathology                                                                               | Amary Fall; C. Paul Morris; David Gaston; Heba H. Mostafa; Julie M. Norton; Matthew Schwartz; Michael Forman; Raghdah Eldesouki                                                                                                                                                                                                                                                                                                                                                                                |
| EPI_ISL_6794907, EPI_ISL_6989250, EPI_ISL_7413964, EPI_ISL_7495278, EPI_ISL_7495279, EPI_ISL_7495280, EPI_ISL_7495281, EPI_ISL_7495282, EPI_ISL_7495283, EPI_ISL_7495284, EPI_ISL_7495285                                                                                                                                                                                            | see above                                                                                                    | KU Leuven, Rega Institute, Clinical and Epidemiological Virology                                                             | Bert Vanmechelen; Casper Geenen; Emmanuel André; Guy Baele; Joan Martí-Carerras; Joren; Lize Cuypers; Piet Maes; Raymenants; Sarah Gorissen; Simon Dellicour; Tony Wawina-Bokalanga                                                                                                                                                                                                                                                                                                                            |
| EPI_ISL_7219990,<br>EPI_ISL_7220437,<br>EPI_ISL_7220444,<br>EPI_ISL_7286284                                                                                                                                                                                                                                                                                                          | Karolinska University Hospital Huddinge                                                                      | Karolinska University Hospital Huddinge                                                                                      | Annika Tiveljung Lindell; Henning Onsbring; Jan Albert; Karina Hentrich; Lynda Eneh; Maria Ropat; Martin Ekman; Natalija Gerasimcik; Robert Dyrdak; Sandra Broddesson; Shambhu Ganeshappa Aralaguppe; Tanja Normark; Tobias Allander; Valtteri Wirta; Zhibing Yun                                                                                                                                                                                                                                              |
| EPI_ISL_7381109,<br>EPI_ISL_7381114,<br>EPI_ISL_7457425,<br>EPI_ISL_7457426                                                                                                                                                                                                                                                                                                          | Karolinska University Hospital Solna                                                                         | Karolinska University Hospital Huddinge                                                                                      | Annika Tiveljung Lindell; Henning Onsbring; Jan Albert; Karina Hentrich; Lynda Eneh; Maria Ropat; Martin Ekman; Natalija Gerasimcik; Robert Dyrdak; Sandra Broddesson; Shambhu Ganeshappa Aralaguppe; Tanja Normark; Tobias Allander; Valtteri Wirta; Zhibing Yun                                                                                                                                                                                                                                              |
| EPI_ISL_7433816,<br>EPI_ISL_7443687,<br>EPI_ISL_7443713                                                                                                                                                                                                                                                                                                                              | Klinikum Ernst von Bergmann gemeinnützige GmbH - stationärer Bereich                                         | Robert Koch Institute                                                                                                        |                                                                                                                                                                                                                                                                                                                                                                                                                                                                                                                |
| EPI_ISL_7224971                                                                                                                                                                                                                                                                                                                                                                      | LACEN do Distrito Federal                                                                                    | Instituto Adolfo Lutz Strategic Laboratory                                                                                   | Claudio Tavares Sacchi; Karoline Rodrigues Campos; Marlon Benedito Nascimento Santos                                                                                                                                                                                                                                                                                                                                                                                                                           |
| EPI_ISL_7550076                                                                                                                                                                                                                                                                                                                                                                      | LACEN do Distrito Federal                                                                                    | Instituto Adolfo Lutz, Interdisciplinary Procedures Center, Strategic Laboratory                                             | Claudio Tavares Sacchi; Karoline Rodrigues Campos                                                                                                                                                                                                                                                                                                                                                                                                                                                              |
| EPI_ISL_6647956, EPI_ISL_6647957, EPI_ISL_6647958, EPI_ISL_6647959, EPI_ISL_6647960, EPI_ISL_6647961, EPI_ISL_6647962, EPI_ISL_6698792, EPI_ISL_6704863, EPI_ISL_6704864, EPI_ISL_6704865, EPI_ISL_6704866, EPI_ISL_6704867, EPI_ISL_6704868, EPI_ISL_6704869, EPI_ISL_6704870, EPI_ISL_6704871, EPI_ISL_6704872, EPI_ISL_6704873, EPI_ISL_6704874, EPI_ISL_6704875, EPI_ISL_6704876 | see above                                                                                                    | LANCET LABORATORY                                                                                                            | Amoako DG; Bhiman JN; Everatt J; Glass A; Ismail A; Mahlangu B; Mnguni A; Mohale T; Ntuli N; Scheepers C; Viana R; Wolter N                                                                                                                                                                                                                                                                                                                                                                                    |

|                                                                                                                                                                                                                                                                                                                                                                                                                                                                                                                                                                                                                                                                                                                                                                                                                                                                                                                                                                                                                                                                                                                                                                                                                                                                                                                                                                                                                                                                                                                                                                                                                                                                                                                                                                                                                                                                                                                                                                                                                                                                                                                                                                                                                                                                                                                                                                                                                                                                                                                                                                                                                                                                                                                                                                                                                                                                                                                                                                                                                                                                                                                                                                                                                                                                                                                                                                                                                                                                                                                                                                                                                                                                                                                                                                                                                                                                                                                                                                                                                                                                                                                                                                                                                                                                                                                                                                                                                                                                                                                                                                                                                                                                                                                                                                                                                                                                                                                                                                                                                                                                                                                                                                                                                                                                                                                                                                                                                                                                                                                                                                                                                                                                                                                                                                                                                                                                                                                                                                                                                                                                                                                                                                                                                                                                                                                                                                                                                                                                                                                                                                                                                                                                                                                                                                                                                                                                                                                                                                                                                                                                                                                                                                                                                                                                                                                                                                                                                                                                                                                                                                                                                                                                                                                                                                                                                                                                                                                                                                                                                                                                                                                                                                                                                                                                                                                                                                                                                                                                                                                                                                                                                                                                                                                                                                                                                                                                                                                                                                                                                                                                                                                                                                                                                                                                                                                                                                                                                                                                                                                                                                                                                                                                                                                                                                                                                                                                                                                                                                                                                                                                                                                                                                                                                                                                                                                                                                                                                                                                                                                                                                                                                                                                                                                                                                                                                                                                                                                                                                                                                                                                                                                                                                                                                                                                                                                                                                                                                                                                                                                                                                                                                                                                                                                                                                                                                                                                                                                                                                                                                                                                                                                                                                                                                                                                                                                                                                                                                                                                                                                                                                                                                                                                                                                                                                                                                                                                                                                                                                                                                                                                                                                                                                                                                                                                                                                                                                                                                                                                                                                                                                                                                                                                                                                                                                                                                                                                                                                                                                                                                                                                                                                                                                                    |                                                                                                                                                         |                                                                                                                                                            |                                                                                                                                                                                                                                                                                                                                                                                                                                                                                                                                                    |
|------------------------------------------------------------------------------------------------------------------------------------------------------------------------------------------------------------------------------------------------------------------------------------------------------------------------------------------------------------------------------------------------------------------------------------------------------------------------------------------------------------------------------------------------------------------------------------------------------------------------------------------------------------------------------------------------------------------------------------------------------------------------------------------------------------------------------------------------------------------------------------------------------------------------------------------------------------------------------------------------------------------------------------------------------------------------------------------------------------------------------------------------------------------------------------------------------------------------------------------------------------------------------------------------------------------------------------------------------------------------------------------------------------------------------------------------------------------------------------------------------------------------------------------------------------------------------------------------------------------------------------------------------------------------------------------------------------------------------------------------------------------------------------------------------------------------------------------------------------------------------------------------------------------------------------------------------------------------------------------------------------------------------------------------------------------------------------------------------------------------------------------------------------------------------------------------------------------------------------------------------------------------------------------------------------------------------------------------------------------------------------------------------------------------------------------------------------------------------------------------------------------------------------------------------------------------------------------------------------------------------------------------------------------------------------------------------------------------------------------------------------------------------------------------------------------------------------------------------------------------------------------------------------------------------------------------------------------------------------------------------------------------------------------------------------------------------------------------------------------------------------------------------------------------------------------------------------------------------------------------------------------------------------------------------------------------------------------------------------------------------------------------------------------------------------------------------------------------------------------------------------------------------------------------------------------------------------------------------------------------------------------------------------------------------------------------------------------------------------------------------------------------------------------------------------------------------------------------------------------------------------------------------------------------------------------------------------------------------------------------------------------------------------------------------------------------------------------------------------------------------------------------------------------------------------------------------------------------------------------------------------------------------------------------------------------------------------------------------------------------------------------------------------------------------------------------------------------------------------------------------------------------------------------------------------------------------------------------------------------------------------------------------------------------------------------------------------------------------------------------------------------------------------------------------------------------------------------------------------------------------------------------------------------------------------------------------------------------------------------------------------------------------------------------------------------------------------------------------------------------------------------------------------------------------------------------------------------------------------------------------------------------------------------------------------------------------------------------------------------------------------------------------------------------------------------------------------------------------------------------------------------------------------------------------------------------------------------------------------------------------------------------------------------------------------------------------------------------------------------------------------------------------------------------------------------------------------------------------------------------------------------------------------------------------------------------------------------------------------------------------------------------------------------------------------------------------------------------------------------------------------------------------------------------------------------------------------------------------------------------------------------------------------------------------------------------------------------------------------------------------------------------------------------------------------------------------------------------------------------------------------------------------------------------------------------------------------------------------------------------------------------------------------------------------------------------------------------------------------------------------------------------------------------------------------------------------------------------------------------------------------------------------------------------------------------------------------------------------------------------------------------------------------------------------------------------------------------------------------------------------------------------------------------------------------------------------------------------------------------------------------------------------------------------------------------------------------------------------------------------------------------------------------------------------------------------------------------------------------------------------------------------------------------------------------------------------------------------------------------------------------------------------------------------------------------------------------------------------------------------------------------------------------------------------------------------------------------------------------------------------------------------------------------------------------------------------------------------------------------------------------------------------------------------------------------------------------------------------------------------------------------------------------------------------------------------------------------------------------------------------------------------------------------------------------------------------------------------------------------------------------------------------------------------------------------------------------------------------------------------------------------------------------------------------------------------------------------------------------------------------------------------------------------------------------------------------------------------------------------------------------------------------------------------------------------------------------------------------------------------------------------------------------------------------------------------------------------------------------------------------------------------------------------------------------------------------------------------------------------------------------------------------------------------------------------------------------------------------------------------------------------------------------------------------------------------------------------------------------------------------------------------------------------------------------------------------------------------------------------------------------------------------------------------------------------------------------------------------------------------------------------------------------------------------------------------------------------------------------------------------------------------------------------------------------------------------------------------------------------------------------------------------------------------------------------------------------------------------------------------------------------------------------------------------------------------------------------------------------------------------------------------------------------------------------------------------------------------------------------------------------------------------------------------------------------------------------------------------------------------------------------------------------------------------------------------------------------------------------------------------------------------------------------------------------------------------------------------------------------------------------------------------------------------------------------------------------------------------------------------------------------------------------------------------------------------------------------------------------------------------------------------------------------------------------------------------------------------------------------------------------------------------------------------------------------------------------------------------------------------------------------------------------------------------------------------------------------------------------------------------------------------------------------------------------------------------------------------------------------------------------------------------------------------------------------------------------------------------------------------------------------------------------------------------------------------------------------------------------------------------------------------------------------------------------------------------------------------------------------------------------------------------------------------------------------------------------------------------------------------------------------------------------------------------------------------------------------------------------------------------------------------------------------------------------------------------------------------------------------------------------------------------------------------------------------------------------------------------------------------------------------------------------------------------------------------------------------------------------------------------------------------------------------------------------------------------------------------------------------------------------------------------------------------------------------------------------------------------------------------------------------------------------------------------------------------------------------------------------------------------------------------------------------------------------------------------------------------------------------------------------------------------------------------------------------------------------------------------------------------------------------------------------------------------------------------------------------------------------------------------------------------------------------------------------------------------------------------------------------------------------------------------------------------------------------------------------------------------------------------------------------------------------------------------------------------------------------------------------------------------------------------------------------------------------------------------------------------------------------------------------------------------------------------------------------------------------------------------------------------------------------------------------------------------------------------------------------------------------------------------------------------------------------------------------------------------------------------------------------------------------------------------------------------------------------------------------------------------------------------------------------------------------------------------------|---------------------------------------------------------------------------------------------------------------------------------------------------------|------------------------------------------------------------------------------------------------------------------------------------------------------------|----------------------------------------------------------------------------------------------------------------------------------------------------------------------------------------------------------------------------------------------------------------------------------------------------------------------------------------------------------------------------------------------------------------------------------------------------------------------------------------------------------------------------------------------------|
| EPI_ISL_6901960,<br>EPI_ISL_6901961,<br>EPI_ISL_7473154<br>EPI_ISL_7472277<br>EPI_ISL_7456529                                                                                                                                                                                                                                                                                                                                                                                                                                                                                                                                                                                                                                                                                                                                                                                                                                                                                                                                                                                                                                                                                                                                                                                                                                                                                                                                                                                                                                                                                                                                                                                                                                                                                                                                                                                                                                                                                                                                                                                                                                                                                                                                                                                                                                                                                                                                                                                                                                                                                                                                                                                                                                                                                                                                                                                                                                                                                                                                                                                                                                                                                                                                                                                                                                                                                                                                                                                                                                                                                                                                                                                                                                                                                                                                                                                                                                                                                                                                                                                                                                                                                                                                                                                                                                                                                                                                                                                                                                                                                                                                                                                                                                                                                                                                                                                                                                                                                                                                                                                                                                                                                                                                                                                                                                                                                                                                                                                                                                                                                                                                                                                                                                                                                                                                                                                                                                                                                                                                                                                                                                                                                                                                                                                                                                                                                                                                                                                                                                                                                                                                                                                                                                                                                                                                                                                                                                                                                                                                                                                                                                                                                                                                                                                                                                                                                                                                                                                                                                                                                                                                                                                                                                                                                                                                                                                                                                                                                                                                                                                                                                                                                                                                                                                                                                                                                                                                                                                                                                                                                                                                                                                                                                                                                                                                                                                                                                                                                                                                                                                                                                                                                                                                                                                                                                                                                                                                                                                                                                                                                                                                                                                                                                                                                                                                                                                                                                                                                                                                                                                                                                                                                                                                                                                                                                                                                                                                                                                                                                                                                                                                                                                                                                                                                                                                                                                                                                                                                                                                                                                                                                                                                                                                                                                                                                                                                                                                                                                                                                                                                                                                                                                                                                                                                                                                                                                                                                                                                                                                                                                                                                                                                                                                                                                                                                                                                                                                                                                                                                                                                                                                                                                                                                                                                                                                                                                                                                                                                                                                                                                                                                                                                                                                                                                                                                                                                                                                                                                                                                                                                                                                                                                                                                                                                                                                                                                                                                                                                                                                                                                                                                                                                      | LATE - Laboratório de Técnicas Especiais - Hospital Israelita Albert Einstein<br><br>LKO<br>LSUHS Emerging Viral Threat Lab                             | Laboratory Service<br>LATE - Laboratório de Técnicas Especiais - Hospital Israelita Albert Einstein<br><br>Jessa<br>LSUHS Emerging Viral Threat Laboratory | Alexandre Hideaki Takara; Ana Paula Moreira Salles; Anelisie da Silva Santos; Deivid Amgarten; Erick Gustavo Dorias; Fernanda de Mello Malta; João Renato Rebello Pinho; Luiz Vicente Rizzo; Marcio Anunciacao Menezes; Pedro Henrique Sebe Rodrigues; Raquel Riyuzo<br><br><br>Severine Berden et al on behalf of the Jessa_cmdLab<br><br>Adrian Almodovar; Alexander Mijalis; Andrew D. Yurochko; Christopher G. Kevil; Gregory L. Ware; Jennifer L. Carroll; Jeremy P. Kamil; John A. Vanchiere; Krista Queen; Maarten Van Diest; Rona S. Scott |
|                                                                                                                                                                                                                                                                                                                                                                                                                                                                                                                                                                                                                                                                                                                                                                                                                                                                                                                                                                                                                                                                                                                                                                                                                                                                                                                                                                                                                                                                                                                                                                                                                                                                                                                                                                                                                                                                                                                                                                                                                                                                                                                                                                                                                                                                                                                                                                                                                                                                                                                                                                                                                                                                                                                                                                                                                                                                                                                                                                                                                                                                                                                                                                                                                                                                                                                                                                                                                                                                                                                                                                                                                                                                                                                                                                                                                                                                                                                                                                                                                                                                                                                                                                                                                                                                                                                                                                                                                                                                                                                                                                                                                                                                                                                                                                                                                                                                                                                                                                                                                                                                                                                                                                                                                                                                                                                                                                                                                                                                                                                                                                                                                                                                                                                                                                                                                                                                                                                                                                                                                                                                                                                                                                                                                                                                                                                                                                                                                                                                                                                                                                                                                                                                                                                                                                                                                                                                                                                                                                                                                                                                                                                                                                                                                                                                                                                                                                                                                                                                                                                                                                                                                                                                                                                                                                                                                                                                                                                                                                                                                                                                                                                                                                                                                                                                                                                                                                                                                                                                                                                                                                                                                                                                                                                                                                                                                                                                                                                                                                                                                                                                                                                                                                                                                                                                                                                                                                                                                                                                                                                                                                                                                                                                                                                                                                                                                                                                                                                                                                                                                                                                                                                                                                                                                                                                                                                                                                                                                                                                                                                                                                                                                                                                                                                                                                                                                                                                                                                                                                                                                                                                                                                                                                                                                                                                                                                                                                                                                                                                                                                                                                                                                                                                                                                                                                                                                                                                                                                                                                                                                                                                                                                                                                                                                                                                                                                                                                                                                                                                                                                                                                                                                                                                                                                                                                                                                                                                                                                                                                                                                                                                                                                                                                                                                                                                                                                                                                                                                                                                                                                                                                                                                                                                                                                                                                                                                                                                                                                                                                                                                                                                                                                                                                                    |                                                                                                                                                         |                                                                                                                                                            |                                                                                                                                                                                                                                                                                                                                                                                                                                                                                                                                                    |
|                                                                                                                                                                                                                                                                                                                                                                                                                                                                                                                                                                                                                                                                                                                                                                                                                                                                                                                                                                                                                                                                                                                                                                                                                                                                                                                                                                                                                                                                                                                                                                                                                                                                                                                                                                                                                                                                                                                                                                                                                                                                                                                                                                                                                                                                                                                                                                                                                                                                                                                                                                                                                                                                                                                                                                                                                                                                                                                                                                                                                                                                                                                                                                                                                                                                                                                                                                                                                                                                                                                                                                                                                                                                                                                                                                                                                                                                                                                                                                                                                                                                                                                                                                                                                                                                                                                                                                                                                                                                                                                                                                                                                                                                                                                                                                                                                                                                                                                                                                                                                                                                                                                                                                                                                                                                                                                                                                                                                                                                                                                                                                                                                                                                                                                                                                                                                                                                                                                                                                                                                                                                                                                                                                                                                                                                                                                                                                                                                                                                                                                                                                                                                                                                                                                                                                                                                                                                                                                                                                                                                                                                                                                                                                                                                                                                                                                                                                                                                                                                                                                                                                                                                                                                                                                                                                                                                                                                                                                                                                                                                                                                                                                                                                                                                                                                                                                                                                                                                                                                                                                                                                                                                                                                                                                                                                                                                                                                                                                                                                                                                                                                                                                                                                                                                                                                                                                                                                                                                                                                                                                                                                                                                                                                                                                                                                                                                                                                                                                                                                                                                                                                                                                                                                                                                                                                                                                                                                                                                                                                                                                                                                                                                                                                                                                                                                                                                                                                                                                                                                                                                                                                                                                                                                                                                                                                                                                                                                                                                                                                                                                                                                                                                                                                                                                                                                                                                                                                                                                                                                                                                                                                                                                                                                                                                                                                                                                                                                                                                                                                                                                                                                                                                                                                                                                                                                                                                                                                                                                                                                                                                                                                                                                                                                                                                                                                                                                                                                                                                                                                                                                                                                                                                                                                                                                                                                                                                                                                                                                                                                                                                                                                                                                                                                                    |                                                                                                                                                         |                                                                                                                                                            |                                                                                                                                                                                                                                                                                                                                                                                                                                                                                                                                                    |
|                                                                                                                                                                                                                                                                                                                                                                                                                                                                                                                                                                                                                                                                                                                                                                                                                                                                                                                                                                                                                                                                                                                                                                                                                                                                                                                                                                                                                                                                                                                                                                                                                                                                                                                                                                                                                                                                                                                                                                                                                                                                                                                                                                                                                                                                                                                                                                                                                                                                                                                                                                                                                                                                                                                                                                                                                                                                                                                                                                                                                                                                                                                                                                                                                                                                                                                                                                                                                                                                                                                                                                                                                                                                                                                                                                                                                                                                                                                                                                                                                                                                                                                                                                                                                                                                                                                                                                                                                                                                                                                                                                                                                                                                                                                                                                                                                                                                                                                                                                                                                                                                                                                                                                                                                                                                                                                                                                                                                                                                                                                                                                                                                                                                                                                                                                                                                                                                                                                                                                                                                                                                                                                                                                                                                                                                                                                                                                                                                                                                                                                                                                                                                                                                                                                                                                                                                                                                                                                                                                                                                                                                                                                                                                                                                                                                                                                                                                                                                                                                                                                                                                                                                                                                                                                                                                                                                                                                                                                                                                                                                                                                                                                                                                                                                                                                                                                                                                                                                                                                                                                                                                                                                                                                                                                                                                                                                                                                                                                                                                                                                                                                                                                                                                                                                                                                                                                                                                                                                                                                                                                                                                                                                                                                                                                                                                                                                                                                                                                                                                                                                                                                                                                                                                                                                                                                                                                                                                                                                                                                                                                                                                                                                                                                                                                                                                                                                                                                                                                                                                                                                                                                                                                                                                                                                                                                                                                                                                                                                                                                                                                                                                                                                                                                                                                                                                                                                                                                                                                                                                                                                                                                                                                                                                                                                                                                                                                                                                                                                                                                                                                                                                                                                                                                                                                                                                                                                                                                                                                                                                                                                                                                                                                                                                                                                                                                                                                                                                                                                                                                                                                                                                                                                                                                                                                                                                                                                                                                                                                                                                                                                                                                                                                                                                                    |                                                                                                                                                         |                                                                                                                                                            |                                                                                                                                                                                                                                                                                                                                                                                                                                                                                                                                                    |
| EPI_ISL_7339434,<br>EPI_ISL_7339435,<br>EPI_ISL_7339436<br>EPI_ISL_7437787                                                                                                                                                                                                                                                                                                                                                                                                                                                                                                                                                                                                                                                                                                                                                                                                                                                                                                                                                                                                                                                                                                                                                                                                                                                                                                                                                                                                                                                                                                                                                                                                                                                                                                                                                                                                                                                                                                                                                                                                                                                                                                                                                                                                                                                                                                                                                                                                                                                                                                                                                                                                                                                                                                                                                                                                                                                                                                                                                                                                                                                                                                                                                                                                                                                                                                                                                                                                                                                                                                                                                                                                                                                                                                                                                                                                                                                                                                                                                                                                                                                                                                                                                                                                                                                                                                                                                                                                                                                                                                                                                                                                                                                                                                                                                                                                                                                                                                                                                                                                                                                                                                                                                                                                                                                                                                                                                                                                                                                                                                                                                                                                                                                                                                                                                                                                                                                                                                                                                                                                                                                                                                                                                                                                                                                                                                                                                                                                                                                                                                                                                                                                                                                                                                                                                                                                                                                                                                                                                                                                                                                                                                                                                                                                                                                                                                                                                                                                                                                                                                                                                                                                                                                                                                                                                                                                                                                                                                                                                                                                                                                                                                                                                                                                                                                                                                                                                                                                                                                                                                                                                                                                                                                                                                                                                                                                                                                                                                                                                                                                                                                                                                                                                                                                                                                                                                                                                                                                                                                                                                                                                                                                                                                                                                                                                                                                                                                                                                                                                                                                                                                                                                                                                                                                                                                                                                                                                                                                                                                                                                                                                                                                                                                                                                                                                                                                                                                                                                                                                                                                                                                                                                                                                                                                                                                                                                                                                                                                                                                                                                                                                                                                                                                                                                                                                                                                                                                                                                                                                                                                                                                                                                                                                                                                                                                                                                                                                                                                                                                                                                                                                                                                                                                                                                                                                                                                                                                                                                                                                                                                                                                                                                                                                                                                                                                                                                                                                                                                                                                                                                                                                                                                                                                                                                                                                                                                                                                                                                                                                                                                                                                                                                         | Lab voor klinische biologie<br><br>Labor Prof. Dr. G. Enders MVZ GbR                                                                                    | Lab voor klinische biologie<br><br>Robert Koch Institute                                                                                                   | Bruno Verhasselt; Hannelore Hamerlinck; Marija Janevska; May-Linh Truong<br><br><br>DE TAYRAC Marie; DENOUAL Florent; ETCHEVERRY Amandine; FEBREAU Christine; GALBERT Marie Dominique; GROHLIER Claire; JAGLINE Charlotte; PROMIER Charlotte; QUENET Benjamin; SASSI Mohamed; THIBAUT Vincent                                                                                                                                                                                                                                                      |
| EPI_ISL_7450035,<br>EPI_ISL_7450728<br>EPI_ISL_6971090<br>EPI_ISL_7309168                                                                                                                                                                                                                                                                                                                                                                                                                                                                                                                                                                                                                                                                                                                                                                                                                                                                                                                                                                                                                                                                                                                                                                                                                                                                                                                                                                                                                                                                                                                                                                                                                                                                                                                                                                                                                                                                                                                                                                                                                                                                                                                                                                                                                                                                                                                                                                                                                                                                                                                                                                                                                                                                                                                                                                                                                                                                                                                                                                                                                                                                                                                                                                                                                                                                                                                                                                                                                                                                                                                                                                                                                                                                                                                                                                                                                                                                                                                                                                                                                                                                                                                                                                                                                                                                                                                                                                                                                                                                                                                                                                                                                                                                                                                                                                                                                                                                                                                                                                                                                                                                                                                                                                                                                                                                                                                                                                                                                                                                                                                                                                                                                                                                                                                                                                                                                                                                                                                                                                                                                                                                                                                                                                                                                                                                                                                                                                                                                                                                                                                                                                                                                                                                                                                                                                                                                                                                                                                                                                                                                                                                                                                                                                                                                                                                                                                                                                                                                                                                                                                                                                                                                                                                                                                                                                                                                                                                                                                                                                                                                                                                                                                                                                                                                                                                                                                                                                                                                                                                                                                                                                                                                                                                                                                                                                                                                                                                                                                                                                                                                                                                                                                                                                                                                                                                                                                                                                                                                                                                                                                                                                                                                                                                                                                                                                                                                                                                                                                                                                                                                                                                                                                                                                                                                                                                                                                                                                                                                                                                                                                                                                                                                                                                                                                                                                                                                                                                                                                                                                                                                                                                                                                                                                                                                                                                                                                                                                                                                                                                                                                                                                                                                                                                                                                                                                                                                                                                                                                                                                                                                                                                                                                                                                                                                                                                                                                                                                                                                                                                                                                                                                                                                                                                                                                                                                                                                                                                                                                                                                                                                                                                                                                                                                                                                                                                                                                                                                                                                                                                                                                                                                                                                                                                                                                                                                                                                                                                                                                                                                                                                                                                                                          | Laboratoire BIORANCE<br><br>Laboratoire analyse med<br>Laboratorio Central de Saude Publica do Rio Grande do Sul/Centro Estadual de Vigilância em Saude | CHU Pontchaillou<br><br>LABORIZON CENTRE BIOGROUP<br>Centro de Desenvolvimento Científico e Tecnológico (CODCT)/Centro Estadual de Vigilância em Saude     |                                                                                                                                                                                                                                                                                                                                                                                                                                                                                                                                                    |
| EPI_ISL_7497691                                                                                                                                                                                                                                                                                                                                                                                                                                                                                                                                                                                                                                                                                                                                                                                                                                                                                                                                                                                                                                                                                                                                                                                                                                                                                                                                                                                                                                                                                                                                                                                                                                                                                                                                                                                                                                                                                                                                                                                                                                                                                                                                                                                                                                                                                                                                                                                                                                                                                                                                                                                                                                                                                                                                                                                                                                                                                                                                                                                                                                                                                                                                                                                                                                                                                                                                                                                                                                                                                                                                                                                                                                                                                                                                                                                                                                                                                                                                                                                                                                                                                                                                                                                                                                                                                                                                                                                                                                                                                                                                                                                                                                                                                                                                                                                                                                                                                                                                                                                                                                                                                                                                                                                                                                                                                                                                                                                                                                                                                                                                                                                                                                                                                                                                                                                                                                                                                                                                                                                                                                                                                                                                                                                                                                                                                                                                                                                                                                                                                                                                                                                                                                                                                                                                                                                                                                                                                                                                                                                                                                                                                                                                                                                                                                                                                                                                                                                                                                                                                                                                                                                                                                                                                                                                                                                                                                                                                                                                                                                                                                                                                                                                                                                                                                                                                                                                                                                                                                                                                                                                                                                                                                                                                                                                                                                                                                                                                                                                                                                                                                                                                                                                                                                                                                                                                                                                                                                                                                                                                                                                                                                                                                                                                                                                                                                                                                                                                                                                                                                                                                                                                                                                                                                                                                                                                                                                                                                                                                                                                                                                                                                                                                                                                                                                                                                                                                                                                                                                                                                                                                                                                                                                                                                                                                                                                                                                                                                                                                                                                                                                                                                                                                                                                                                                                                                                                                                                                                                                                                                                                                                                                                                                                                                                                                                                                                                                                                                                                                                                                                                                                                                                                                                                                                                                                                                                                                                                                                                                                                                                                                                                                                                                                                                                                                                                                                                                                                                                                                                                                                                                                                                                                                                                                                                                                                                                                                                                                                                                                                                                                                                                                                                                                                    | Laboratory Corporation of America                                                                                                                       | Centers for Disease Control and Prevention Division of Viral Diseases, Pathogen Discovery                                                                  |                                                                                                                                                                                                                                                                                                                                                                                                                                                                                                                                                    |
| EPI_ISL_7220176                                                                                                                                                                                                                                                                                                                                                                                                                                                                                                                                                                                                                                                                                                                                                                                                                                                                                                                                                                                                                                                                                                                                                                                                                                                                                                                                                                                                                                                                                                                                                                                                                                                                                                                                                                                                                                                                                                                                                                                                                                                                                                                                                                                                                                                                                                                                                                                                                                                                                                                                                                                                                                                                                                                                                                                                                                                                                                                                                                                                                                                                                                                                                                                                                                                                                                                                                                                                                                                                                                                                                                                                                                                                                                                                                                                                                                                                                                                                                                                                                                                                                                                                                                                                                                                                                                                                                                                                                                                                                                                                                                                                                                                                                                                                                                                                                                                                                                                                                                                                                                                                                                                                                                                                                                                                                                                                                                                                                                                                                                                                                                                                                                                                                                                                                                                                                                                                                                                                                                                                                                                                                                                                                                                                                                                                                                                                                                                                                                                                                                                                                                                                                                                                                                                                                                                                                                                                                                                                                                                                                                                                                                                                                                                                                                                                                                                                                                                                                                                                                                                                                                                                                                                                                                                                                                                                                                                                                                                                                                                                                                                                                                                                                                                                                                                                                                                                                                                                                                                                                                                                                                                                                                                                                                                                                                                                                                                                                                                                                                                                                                                                                                                                                                                                                                                                                                                                                                                                                                                                                                                                                                                                                                                                                                                                                                                                                                                                                                                                                                                                                                                                                                                                                                                                                                                                                                                                                                                                                                                                                                                                                                                                                                                                                                                                                                                                                                                                                                                                                                                                                                                                                                                                                                                                                                                                                                                                                                                                                                                                                                                                                                                                                                                                                                                                                                                                                                                                                                                                                                                                                                                                                                                                                                                                                                                                                                                                                                                                                                                                                                                                                                                                                                                                                                                                                                                                                                                                                                                                                                                                                                                                                                                                                                                                                                                                                                                                                                                                                                                                                                                                                                                                                                                                                                                                                                                                                                                                                                                                                                                                                                                                                                                                                                    | Laboratory of Clinical Virology Heraklion Crete                                                                                                         | Laboratory of Clinical Virology Heraklion Crete                                                                                                            |                                                                                                                                                                                                                                                                                                                                                                                                                                                                                                                                                    |
| EPI_ISL_7543999<br>EPI_ISL_7264143                                                                                                                                                                                                                                                                                                                                                                                                                                                                                                                                                                                                                                                                                                                                                                                                                                                                                                                                                                                                                                                                                                                                                                                                                                                                                                                                                                                                                                                                                                                                                                                                                                                                                                                                                                                                                                                                                                                                                                                                                                                                                                                                                                                                                                                                                                                                                                                                                                                                                                                                                                                                                                                                                                                                                                                                                                                                                                                                                                                                                                                                                                                                                                                                                                                                                                                                                                                                                                                                                                                                                                                                                                                                                                                                                                                                                                                                                                                                                                                                                                                                                                                                                                                                                                                                                                                                                                                                                                                                                                                                                                                                                                                                                                                                                                                                                                                                                                                                                                                                                                                                                                                                                                                                                                                                                                                                                                                                                                                                                                                                                                                                                                                                                                                                                                                                                                                                                                                                                                                                                                                                                                                                                                                                                                                                                                                                                                                                                                                                                                                                                                                                                                                                                                                                                                                                                                                                                                                                                                                                                                                                                                                                                                                                                                                                                                                                                                                                                                                                                                                                                                                                                                                                                                                                                                                                                                                                                                                                                                                                                                                                                                                                                                                                                                                                                                                                                                                                                                                                                                                                                                                                                                                                                                                                                                                                                                                                                                                                                                                                                                                                                                                                                                                                                                                                                                                                                                                                                                                                                                                                                                                                                                                                                                                                                                                                                                                                                                                                                                                                                                                                                                                                                                                                                                                                                                                                                                                                                                                                                                                                                                                                                                                                                                                                                                                                                                                                                                                                                                                                                                                                                                                                                                                                                                                                                                                                                                                                                                                                                                                                                                                                                                                                                                                                                                                                                                                                                                                                                                                                                                                                                                                                                                                                                                                                                                                                                                                                                                                                                                                                                                                                                                                                                                                                                                                                                                                                                                                                                                                                                                                                                                                                                                                                                                                                                                                                                                                                                                                                                                                                                                                                                                                                                                                                                                                                                                                                                                                                                                                                                                                                                                                                                 | Lady Michaelis CDC wc LMC<br>Lahey Hospital                                                                                                             | NHLS/UCT<br>New England Biolabs                                                                                                                            | Arash Iranzadeh; Bruna Galvao; Carolyn Williamson; Deelan Doolabh; Diana Hardie; Gert Marais; Innocent Mudau; Luicer Olubayo; Lynn Tyers; Marvin Hsiao; Nokuzola Mbhele; Rageema Joseph; Stephen Korsman<br>Abel, G.; B.W.; C.J.; Elfahal, M.; Flynn; Heim, K.; Karolides, M.; L. and Langhorst; Leger, P.; Michaels, L.; Pinet, K.; Skelton, T.; Sun                                                                                                                                                                                              |
| EPI_ISL_7543847, EPI_ISL_7543913, EPI_ISL_7543935, EPI_ISL_7543949, EPI_ISL_7543960, EPI_ISL_7544508, EPI_ISL_7544601, EPI_ISL_7544676, EPI_ISL_7544705<br>see above                                                                                                                                                                                                                                                                                                                                                                                                                                                                                                                                                                                                                                                                                                                                                                                                                                                                                                                                                                                                                                                                                                                                                                                                                                                                                                                                                                                                                                                                                                                                                                                                                                                                                                                                                                                                                                                                                                                                                                                                                                                                                                                                                                                                                                                                                                                                                                                                                                                                                                                                                                                                                                                                                                                                                                                                                                                                                                                                                                                                                                                                                                                                                                                                                                                                                                                                                                                                                                                                                                                                                                                                                                                                                                                                                                                                                                                                                                                                                                                                                                                                                                                                                                                                                                                                                                                                                                                                                                                                                                                                                                                                                                                                                                                                                                                                                                                                                                                                                                                                                                                                                                                                                                                                                                                                                                                                                                                                                                                                                                                                                                                                                                                                                                                                                                                                                                                                                                                                                                                                                                                                                                                                                                                                                                                                                                                                                                                                                                                                                                                                                                                                                                                                                                                                                                                                                                                                                                                                                                                                                                                                                                                                                                                                                                                                                                                                                                                                                                                                                                                                                                                                                                                                                                                                                                                                                                                                                                                                                                                                                                                                                                                                                                                                                                                                                                                                                                                                                                                                                                                                                                                                                                                                                                                                                                                                                                                                                                                                                                                                                                                                                                                                                                                                                                                                                                                                                                                                                                                                                                                                                                                                                                                                                                                                                                                                                                                                                                                                                                                                                                                                                                                                                                                                                                                                                                                                                                                                                                                                                                                                                                                                                                                                                                                                                                                                                                                                                                                                                                                                                                                                                                                                                                                                                                                                                                                                                                                                                                                                                                                                                                                                                                                                                                                                                                                                                                                                                                                                                                                                                                                                                                                                                                                                                                                                                                                                                                                                                                                                                                                                                                                                                                                                                                                                                                                                                                                                                                                                                                                                                                                                                                                                                                                                                                                                                                                                                                                                                                                                                                                                                                                                                                                                                                                                                                                                                                                                                                                                                                                                               | Lancet                                                                                                                                                  | NHLS/UCT                                                                                                                                                   | Arash Iranzadeh; Bruna Galvao; Carolyn Williamson; Deelan Doolabh; Diana Hardie; Gert Marais; Innocent Mudau; Luicer Olubayo; Lynn Tyers; Marvin Hsiao; Nokuzola Mbhele; Rageema Joseph; Stephen Korsman<br>EPI_ISL_6913991, EPI_ISL_6913992, EPI_ISL_6913993, EPI_ISL_6913994, EPI_ISL_6913995, EPI_ISL_6913996, EPI_ISL_6913997, EPI_ISL_6913998, EPI_ISL_6913999, EPI_ISL_6914000, EPI_ISL_6914001, EPI_ISL_6914002, EPI_ISL_6914003, EPI_ISL_6914004, EPI_ISL_6914005, EPI_ISL_6914006, EPI_ISL_6914007                                        |
| see above                                                                                                                                                                                                                                                                                                                                                                                                                                                                                                                                                                                                                                                                                                                                                                                                                                                                                                                                                                                                                                                                                                                                                                                                                                                                                                                                                                                                                                                                                                                                                                                                                                                                                                                                                                                                                                                                                                                                                                                                                                                                                                                                                                                                                                                                                                                                                                                                                                                                                                                                                                                                                                                                                                                                                                                                                                                                                                                                                                                                                                                                                                                                                                                                                                                                                                                                                                                                                                                                                                                                                                                                                                                                                                                                                                                                                                                                                                                                                                                                                                                                                                                                                                                                                                                                                                                                                                                                                                                                                                                                                                                                                                                                                                                                                                                                                                                                                                                                                                                                                                                                                                                                                                                                                                                                                                                                                                                                                                                                                                                                                                                                                                                                                                                                                                                                                                                                                                                                                                                                                                                                                                                                                                                                                                                                                                                                                                                                                                                                                                                                                                                                                                                                                                                                                                                                                                                                                                                                                                                                                                                                                                                                                                                                                                                                                                                                                                                                                                                                                                                                                                                                                                                                                                                                                                                                                                                                                                                                                                                                                                                                                                                                                                                                                                                                                                                                                                                                                                                                                                                                                                                                                                                                                                                                                                                                                                                                                                                                                                                                                                                                                                                                                                                                                                                                                                                                                                                                                                                                                                                                                                                                                                                                                                                                                                                                                                                                                                                                                                                                                                                                                                                                                                                                                                                                                                                                                                                                                                                                                                                                                                                                                                                                                                                                                                                                                                                                                                                                                                                                                                                                                                                                                                                                                                                                                                                                                                                                                                                                                                                                                                                                                                                                                                                                                                                                                                                                                                                                                                                                                                                                                                                                                                                                                                                                                                                                                                                                                                                                                                                                                                                                                                                                                                                                                                                                                                                                                                                                                                                                                                                                                                                                                                                                                                                                                                                                                                                                                                                                                                                                                                                                                                                                                                                                                                                                                                                                                                                                                                                                                                                                                                                                                                          | Lancet Laboratories                                                                                                                                     | National Institute for Communicable Diseases of the National Health Laboratory Service                                                                     | Amoako DG; Bhiman JN; Everatt J; Ismail A; Mahlangu B; Mnguni A; Mohale T; Ntuli N; Scheepers C; Wolter N                                                                                                                                                                                                                                                                                                                                                                                                                                          |
| EPI_ISL_7420297,<br>EPI_ISL_7420298,<br>EPI_ISL_7420371,<br>EPI_ISL_7420381<br>EPI_ISL_7543863<br>EPI_ISL_7348417,<br>EPI_ISL_7348427                                                                                                                                                                                                                                                                                                                                                                                                                                                                                                                                                                                                                                                                                                                                                                                                                                                                                                                                                                                                                                                                                                                                                                                                                                                                                                                                                                                                                                                                                                                                                                                                                                                                                                                                                                                                                                                                                                                                                                                                                                                                                                                                                                                                                                                                                                                                                                                                                                                                                                                                                                                                                                                                                                                                                                                                                                                                                                                                                                                                                                                                                                                                                                                                                                                                                                                                                                                                                                                                                                                                                                                                                                                                                                                                                                                                                                                                                                                                                                                                                                                                                                                                                                                                                                                                                                                                                                                                                                                                                                                                                                                                                                                                                                                                                                                                                                                                                                                                                                                                                                                                                                                                                                                                                                                                                                                                                                                                                                                                                                                                                                                                                                                                                                                                                                                                                                                                                                                                                                                                                                                                                                                                                                                                                                                                                                                                                                                                                                                                                                                                                                                                                                                                                                                                                                                                                                                                                                                                                                                                                                                                                                                                                                                                                                                                                                                                                                                                                                                                                                                                                                                                                                                                                                                                                                                                                                                                                                                                                                                                                                                                                                                                                                                                                                                                                                                                                                                                                                                                                                                                                                                                                                                                                                                                                                                                                                                                                                                                                                                                                                                                                                                                                                                                                                                                                                                                                                                                                                                                                                                                                                                                                                                                                                                                                                                                                                                                                                                                                                                                                                                                                                                                                                                                                                                                                                                                                                                                                                                                                                                                                                                                                                                                                                                                                                                                                                                                                                                                                                                                                                                                                                                                                                                                                                                                                                                                                                                                                                                                                                                                                                                                                                                                                                                                                                                                                                                                                                                                                                                                                                                                                                                                                                                                                                                                                                                                                                                                                                                                                                                                                                                                                                                                                                                                                                                                                                                                                                                                                                                                                                                                                                                                                                                                                                                                                                                                                                                                                                                                                                                                                                                                                                                                                                                                                                                                                                                                                                                                                                                                                                              | Landesgesundheitsamt Baden-Württemberg<br><br>Langa Clinic wc LAN<br>Lifebrain Covid Labor GmbH                                                         | Robert Koch Institute<br><br>NHLS/UCT<br>Lifebrain Covid Labor GmbH                                                                                        | Arash Iranzadeh; Bruna Galvao; Carolyn Williamson; Deelan Doolabh; Diana Hardie; Gert Marais; Innocent Mudau; Luicer Olubayo; Lynn Tyers; Marvin Hsiao; Nokuzola Mbhele; Rageema Joseph; Stephen Korsman<br>Filip Sima                                                                                                                                                                                                                                                                                                                             |
| EPI_ISL_6821008, EPI_ISL_6916148, EPI_ISL_7023724, EPI_ISL_7144808, EPI_ISL_7144986, EPI_ISL_7148837, EPI_ISL_7187307, EPI_ISL_7200868, EPI_ISL_7290346, EPI_ISL_7293790, EPI_ISL_7293812, EPI_ISL_7293816, EPI_ISL_7293841, EPI_ISL_7293869, EPI_ISL_7293903, EPI_ISL_7294032, EPI_ISL_7294185, EPI_ISL_7296873, EPI_ISL_7301592, EPI_ISL_7301662, EPI_ISL_7305287, EPI_ISL_7344013, EPI_ISL_7344598, EPI_ISL_7344677, EPI_ISL_7344684, EPI_ISL_7351048, EPI_ISL_7351049, EPI_ISL_7351050, EPI_ISL_7351051, EPI_ISL_7351052, EPI_ISL_7351053, EPI_ISL_7351054, EPI_ISL_7351055, EPI_ISL_7351056, EPI_ISL_7351057, EPI_ISL_7351058, EPI_ISL_7351059, EPI_ISL_7351060, EPI_ISL_7351061, EPI_ISL_7351062, EPI_ISL_7351063, EPI_ISL_7351064, EPI_ISL_7351065, EPI_ISL_7351066, EPI_ISL_7351067, EPI_ISL_7351068, EPI_ISL_7351069, EPI_ISL_7351070, EPI_ISL_7351071, EPI_ISL_7351072, EPI_ISL_7351073, EPI_ISL_7351074, EPI_ISL_7351075, EPI_ISL_7351076, EPI_ISL_7351077, EPI_ISL_7351078, EPI_ISL_7351079, EPI_ISL_7351080, EPI_ISL_7351081, EPI_ISL_7351082, EPI_ISL_7351083, EPI_ISL_7351084, EPI_ISL_7351085, EPI_ISL_7351086, EPI_ISL_7351087, EPI_ISL_7351088, EPI_ISL_7351089, EPI_ISL_7351090, EPI_ISL_7351091, EPI_ISL_7351092, EPI_ISL_7351093, EPI_ISL_7351094, EPI_ISL_7351095, EPI_ISL_7351096, EPI_ISL_7351097, EPI_ISL_7351098, EPI_ISL_7351099, EPI_ISL_7351100, EPI_ISL_7351101, EPI_ISL_7351102, EPI_ISL_7351103, EPI_ISL_7351104, EPI_ISL_7351105, EPI_ISL_7351106, EPI_ISL_7351107, EPI_ISL_7351108, EPI_ISL_7351109, EPI_ISL_7351110, EPI_ISL_7351111, EPI_ISL_7351112, EPI_ISL_7351113, EPI_ISL_7351114, EPI_ISL_7351115, EPI_ISL_7351116, EPI_ISL_7351117, EPI_ISL_7351118, EPI_ISL_7351119, EPI_ISL_7351120, EPI_ISL_7351121, EPI_ISL_7351122, EPI_ISL_7351123, EPI_ISL_7351124, EPI_ISL_7351125, EPI_ISL_7351126, EPI_ISL_7351127, EPI_ISL_7351128, EPI_ISL_7351129, EPI_ISL_7351130, EPI_ISL_7351131, EPI_ISL_7351132, EPI_ISL_7351133, EPI_ISL_7351134, EPI_ISL_7351135, EPI_ISL_7351136, EPI_ISL_7351137, EPI_ISL_7351138, EPI_ISL_7351139, EPI_ISL_7351140, EPI_ISL_7351141, EPI_ISL_7351142, EPI_ISL_7351143, EPI_ISL_7351144, EPI_ISL_7351145, EPI_ISL_7351146, EPI_ISL_7351147, EPI_ISL_7351148, EPI_ISL_7351149, EPI_ISL_7351150, EPI_ISL_7351151, EPI_ISL_7351152, EPI_ISL_7351153, EPI_ISL_7351154, EPI_ISL_7351155, EPI_ISL_7351156, EPI_ISL_7351157, EPI_ISL_7351158, EPI_ISL_7351159, EPI_ISL_7351160, EPI_ISL_7351161, EPI_ISL_7351162, EPI_ISL_7351163, EPI_ISL_7351164, EPI_ISL_7351165, EPI_ISL_7351166, EPI_ISL_7351167, EPI_ISL_7351168, EPI_ISL_7351169, EPI_ISL_7351170, EPI_ISL_7351171, EPI_ISL_7351172, EPI_ISL_7351173, EPI_ISL_7351174, EPI_ISL_7351175, EPI_ISL_7351176, EPI_ISL_7351177, EPI_ISL_7351178, EPI_ISL_7351179, EPI_ISL_7351180, EPI_ISL_7351181, EPI_ISL_7351182, EPI_ISL_7351183, EPI_ISL_7351184, EPI_ISL_7351185, EPI_ISL_7351186, EPI_ISL_7351187, EPI_ISL_7351188, EPI_ISL_7351189, EPI_ISL_7351190, EPI_ISL_7351191, EPI_ISL_7351192, EPI_ISL_7351193, EPI_ISL_7351194, EPI_ISL_7351195, EPI_ISL_7351196, EPI_ISL_7351197, EPI_ISL_7351198, EPI_ISL_7351199, EPI_ISL_7351200, EPI_ISL_7351201, EPI_ISL_7351202, EPI_ISL_7351203, EPI_ISL_7351204, EPI_ISL_7351205, EPI_ISL_7351206, EPI_ISL_7351207, EPI_ISL_7351208, EPI_ISL_7351209, EPI_ISL_7351210, EPI_ISL_7351211, EPI_ISL_7351212, EPI_ISL_7351213, EPI_ISL_7351214, EPI_ISL_7351215, EPI_ISL_7351216, EPI_ISL_7351217, EPI_ISL_7351218, EPI_ISL_7351219, EPI_ISL_7351220, EPI_ISL_7351221, EPI_ISL_7351222, EPI_ISL_7351223, EPI_ISL_7351224, EPI_ISL_7351225, EPI_ISL_7351226, EPI_ISL_7351227, EPI_ISL_7351228, EPI_ISL_7351229, EPI_ISL_7351230, EPI_ISL_7351231, EPI_ISL_7351232, EPI_ISL_7351233, EPI_ISL_7351234, EPI_ISL_7351235, EPI_ISL_7351236, EPI_ISL_7351237, EPI_ISL_7351238, EPI_ISL_7351239, EPI_ISL_7351240, EPI_ISL_7351241, EPI_ISL_7351242, EPI_ISL_7351243, EPI_ISL_7351244, EPI_ISL_7351245, EPI_ISL_7351246, EPI_ISL_7351247, EPI_ISL_7351248, EPI_ISL_7351249, EPI_ISL_7351250, EPI_ISL_7351251, EPI_ISL_7351252, EPI_ISL_7351253, EPI_ISL_7351254, EPI_ISL_7351255, EPI_ISL_7351256, EPI_ISL_7351257, EPI_ISL_7351258, EPI_ISL_7351259, EPI_ISL_7351260, EPI_ISL_7351261, EPI_ISL_7351262, EPI_ISL_7351263, EPI_ISL_7351264, EPI_ISL_7351265, EPI_ISL_7351266, EPI_ISL_7351267, EPI_ISL_7351268, EPI_ISL_7351269, EPI_ISL_7351270, EPI_ISL_7351271, EPI_ISL_7351272, EPI_ISL_7351273, EPI_ISL_7351274, EPI_ISL_7351275, EPI_ISL_7351276, EPI_ISL_7351277, EPI_ISL_7351278, EPI_ISL_7351279, EPI_ISL_7351280, EPI_ISL_7351281, EPI_ISL_7351282, EPI_ISL_7351283, EPI_ISL_7351284, EPI_ISL_7351285, EPI_ISL_7351286, EPI_ISL_7351287, EPI_ISL_7351288, EPI_ISL_7351289, EPI_ISL_7351290, EPI_ISL_7351291, EPI_ISL_7351292, EPI_ISL_7351293, EPI_ISL_7351294, EPI_ISL_7351295, EPI_ISL_7351296, EPI_ISL_7351297, EPI_ISL_7351298, EPI_ISL_7351299, EPI_ISL_7351300, EPI_ISL_7351301, EPI_ISL_7351302, EPI_ISL_7351303, EPI_ISL_7351304, EPI_ISL_7351305, EPI_ISL_7351306, EPI_ISL_7351307, EPI_ISL_7351308, EPI_ISL_7351309, EPI_ISL_7351310, EPI_ISL_7351311, EPI_ISL_7351312, EPI_ISL_7351313, EPI_ISL_7351314, EPI_ISL_7351315, EPI_ISL_7351316, EPI_ISL_7351317, EPI_ISL_7351318, EPI_ISL_7351319, EPI_ISL_7351320, EPI_ISL_7351321, EPI_ISL_7351322, EPI_ISL_7351323, EPI_ISL_7351324, EPI_ISL_7351325, EPI_ISL_7351326, EPI_ISL_7351327, EPI_ISL_7351328, EPI_ISL_7351329, EPI_ISL_7351330, EPI_ISL_7351331, EPI_ISL_7351332, EPI_ISL_7351333, EPI_ISL_7351334, EPI_ISL_7351335, EPI_ISL_7351336, EPI_ISL_7351337, EPI_ISL_7351338, EPI_ISL_7351339, EPI_ISL_7351340, EPI_ISL_7351341, EPI_ISL_7351342, EPI_ISL_7351343, EPI_ISL_7351344, EPI_ISL_7351345, EPI_ISL_7351346, EPI_ISL_7351347, EPI_ISL_7351348, EPI_ISL_7351349, EPI_ISL_7351350, EPI_ISL_7351351, EPI_ISL_7351352, EPI_ISL_7351353, EPI_ISL_7351354, EPI_ISL_7351355, EPI_ISL_7351356, EPI_ISL_7351357, EPI_ISL_7351358, EPI_ISL_7351359, EPI_ISL_7351360, EPI_ISL_7351361, EPI_ISL_7351362, EPI_ISL_7351363, EPI_ISL_7351364, EPI_ISL_7351365, EPI_ISL_7351366, EPI_ISL_7351367, EPI_ISL_7351368, EPI_ISL_7351369, EPI_ISL_7351370, EPI_ISL_7351371, EPI_ISL_7351372, EPI_ISL_7351373, EPI_ISL_7351374, EPI_ISL_7351375, EPI_ISL_7351376, EPI_ISL_7351377, EPI_ISL_7351378, EPI_ISL_7351379, EPI_ISL_7351380, EPI_ISL_7351381, EPI_ISL_7351382, EPI_ISL_7351383, EPI_ISL_7351384, EPI_ISL_7351385, EPI_ISL_7351386, EPI_ISL_7351387, EPI_ISL_7351388, EPI_ISL_7351389, EPI_ISL_7351390, EPI_ISL_7351391, EPI_ISL_7351392, EPI_ISL_7351393, EPI_ISL_7351394, EPI_ISL_7351395, EPI_ISL_7351396, EPI_ISL_7351397, EPI_ISL_7351398, EPI_ISL_7351399, EPI_ISL_7351400, EPI_ISL_7351401, EPI_ISL_7351402, EPI_ISL_7351403, EPI_ISL_7351404, EPI_ISL_7351405, EPI_ISL_7351406, EPI_ISL_7351407, EPI_ISL_7351408, EPI_ISL_7351409, EPI_ISL_7351410, EPI_ISL_7351411, EPI_ISL_7351412, EPI_ISL_7351413, EPI_ISL_7351414, EPI_ISL_7351415, EPI_ISL_7351416, EPI_ISL_7351417, EPI_ISL_7351418, EPI_ISL_7351419, EPI_ISL_7351420, EPI_ISL_7351421, EPI_ISL_7351422, EPI_ISL_7351423, EPI_ISL_7351424, EPI_ISL_7351425, EPI_ISL_7351426, EPI_ISL_7351427, EPI_ISL_7351428, EPI_ISL_7351429, EPI_ISL_7351430, EPI_ISL_7351431, EPI_ISL_7351432, EPI_ISL_7351433, EPI_ISL_7351434, EPI_ISL_7351435, EPI_ISL_7351436, EPI_ISL_7351437, EPI_ISL_7351438, EPI_ISL_7351439, EPI_ISL_7351440, EPI_ISL_7351441, EPI_ISL_7351442, EPI_ISL_7351443, EPI_ISL_7351444, EPI_ISL_7351445, EPI_ISL_7351446, EPI_ISL_7351447, EPI_ISL_7351448, EPI_ISL_7351449, EPI_ISL_7351450, EPI_ISL_7351451, EPI_ISL_7351452, EPI_ISL_7351453, EPI_ISL_7351454, EPI_ISL_7351455, EPI_ISL_7351456, EPI_ISL_7351457, EPI_ISL_7351458, EPI_ISL_7351459, EPI_ISL_7351460, EPI_ISL_7351461, EPI_ISL_7351462, EPI_ISL_7351463, EPI_ISL_7351464, EPI_ISL_7351465, EPI_ISL_7351466, EPI_ISL_7351467, EPI_ISL_7351468, EPI_ISL_7351469, EPI_ISL_7351470, EPI_ISL_7351471, EPI_ISL_7351472, EPI_ISL_7351473, EPI_ISL_7351474, EPI_ISL_7351475, EPI_ISL_7351476, EPI_ISL_7351477, EPI_ISL_7351478, EPI_ISL_7351479, EPI_ISL_7351480, EPI_ISL_7351481, EPI_ISL_7351482, EPI_ISL_7351483, EPI_ISL_7351484, EPI_ISL_7351485, EPI_ISL_7351486, EPI_ISL_7351487, EPI_ISL_7351488, EPI_ISL_7351489, EPI_ISL_7351490, EPI_ISL_7351491, EPI_ISL_7351492, EPI_ISL_7351493, EPI_ISL_7351494, EPI_ISL_7351495, EPI_ISL_7351496, EPI_ISL_7351497, EPI_ISL_7351498, EPI_ISL_7351499, EPI_ISL_7351500, EPI_ISL_7351501, EPI_ISL_7351502, EPI_ISL_7351503, EPI_ISL_7351504, EPI_ISL_7351505, EPI_ISL_7351506, EPI_ISL_7351507, EPI_ISL_7351508, EPI_ISL_7351509, EPI_ISL_7351510, EPI_ISL_7351511, EPI_ISL_7351512, EPI_ISL_7351513, EPI_ISL_7351514, EPI_ISL_7351515, EPI_ISL_7351516, EPI_ISL_7351517, EPI_ISL_7351518, EPI_ISL_7351519, EPI_ISL_7351520, EPI_ISL_7351521, EPI_ISL_7351522, EPI_ISL_7351523, EPI_ISL_7351524, EPI_ISL_7351525, EPI_ISL_7351526, EPI_ISL_7351527, EPI_ISL_7351528, EPI_ISL_7351529, EPI_ISL_7351530, EPI_ISL_7351531, EPI_ISL_7351532, EPI_ISL_7351533, EPI_ISL_7351534, EPI_ISL_7351535, EPI_ISL_7351536, EPI_ISL_7351537, EPI_ISL_7351538, EPI_ISL_7351539, EPI_ISL_7351540, EPI_ISL_7351541, EPI_ISL_7351542, EPI_ISL_7351543, EPI_ISL_7351544, EPI_ISL_7351545, EPI_ISL_7351546, EPI_ISL_7351547, EPI_ISL_7351548, EPI_ISL_7351549, EPI_ISL_7351550, EPI_ISL_7351551, EPI_ISL_7351552, EPI_ISL_7351553, EPI_ISL_7351554, EPI_ISL_7351555, EPI_ISL_7351556, EPI_ISL_7351557, EPI_ISL_7351558, EPI_ISL_7351559, EPI_ISL_7351560, EPI_ISL_7351561, EPI_ISL_7351562, EPI_ISL_7351563, EPI_ISL_7351564, EPI_ISL_7351565, EPI_ISL_7351566, EPI_ISL_7351567, EPI_ISL_7351568, EPI_ISL_7351569, EPI_ISL_7351570, EPI_ISL_7351571, EPI_ISL_7351572, EPI_ISL_7351573, EPI_ISL_7351574, EPI_ISL_7351575, EPI_ISL_7351576, EPI_ISL_7351577, EPI_ISL_7351578, EPI_ISL_7351579, EPI_ISL_7351580, EPI_ISL_7351581, EPI_ISL_7351582, EPI_ISL_7351583, EPI_ISL_7351584, EPI_ISL_7351585, EPI_ISL_7351586, EPI_ISL_7351587, EPI_ISL_7351588, EPI_ISL_7351589, EPI_ISL_7351590, EPI_ISL_7351591, EPI_ISL_7351592, EPI_ISL_7351593, EPI_ISL_7351594, EPI_ISL_7351595, EPI_ISL_7351596, EPI_ISL_7351597, EPI_ISL_7351598, EPI_ISL_7351599, EPI_ISL_7351600, EPI_ISL_7351601, EPI_ISL_7351602, EPI_ISL_7351603, EPI_ISL_7351604, EPI_ISL_7351605, EPI_ISL_7351606, EPI_ISL_7351607, EPI_ISL_7351608, EPI_ISL_7351609, EPI_ISL_7351610, EPI_ISL_7351611, EPI_ISL_7351612, EPI_ISL_7351613, EPI_ISL_7351614, EPI_ISL_7351615, EPI_ISL_7351616, EPI_ISL_7351617, EPI_ISL_7351618, EPI_ISL_7351619, EPI_ISL_7351620, EPI_ISL_7351621, EPI_ISL_7351622, EPI_ISL_7351623, EPI_ISL_7351624, EPI_ISL_7351625, EPI_ISL_7351626, EPI_ISL_7351627, EPI_ISL_7351628, EPI_ISL_7351629, EPI_ISL_7351630, EPI_ISL_7351631, EPI_ISL_7351632, EPI_ISL_7351633, EPI_ISL_7351634, EPI_ISL_7351635, EPI_ISL_7351636, EPI_ISL_7351637, EPI_ISL_7351638, EPI_ISL_7351639, EPI_ISL_7351640, EPI_ISL_7351641, EPI_ISL_7351642, EPI_ISL_7351643, EPI_ISL_7351644, EPI_ISL_7351645, EPI_ISL_7351646, EPI_ISL_7351647, EPI_ISL_7351648, EPI_ISL_7351649, EPI_ISL_7351650, EPI_ISL_7351651, EPI_ISL_7351652, EPI_ISL_7351653, EPI_ISL_7351654, EPI_ISL_7351655, EPI_ISL_7351656, EPI_ISL_7351657, EPI_ISL_7351658, EPI_ISL_7351659, EPI_ISL_7351660, EPI_ISL_7351661, EPI_ISL_7351662, EPI_ISL_7351663, EPI_ISL_7351664, EPI_ISL_7351665, EPI_ISL_7351666, EPI_ISL_7351667, EPI_ISL_7351668, EPI_ISL_7351669, EPI_ISL_7351670, EPI_ISL_7351671, EPI_ISL_7351672, EPI_ISL_7351673, EPI_ISL_7351674, EPI_ISL_7351675, EPI_ISL_7351676, EPI_ISL_7351677, EPI_ISL_7351678, EPI_ISL_7351679, EPI_ISL_7351680, EPI_ISL_7351681, EPI_ISL_7351682, EPI_ISL_7351683, EPI_ISL_7351684, EPI_ISL_7351685, EPI_ISL_7351686, EPI_ISL_7351687, EPI_ISL_7351688, EPI_ISL_7351689, EPI_ISL_7351690, EPI_ISL_7351691, EPI_ISL_7351692, EPI_ISL_7351693, EPI_ISL_7351694, EPI_ISL_7351695, EPI_ISL_7351696, EPI_ISL_7351697, EPI_ISL_7351698, EPI_ISL_7351699, EPI_ISL_7351700, EPI_ISL_7351701, EPI_ISL_7351702, EPI_ISL_7351703, EPI_ISL_7351704, EPI_ISL_7351705, EPI_ISL_7351706, EPI_ISL_7351707, EPI_ISL_7351708, EPI_ISL_7351709, EPI_ISL_7351710, EPI_ISL_7351711, EPI_ISL_7351712, EPI_ISL_7351713, EPI_ISL_7351714, EPI_ISL_7351715, EPI_ISL_7351716, EPI_ISL_7351717, EPI_ISL_7351718, EPI_ISL_7351719, EPI_ISL_7351720, EPI_ISL_7351721, EPI_ISL_7351722, EPI_ISL_7351723, EPI_ISL_7351724, EPI_ISL_7351725, EPI_ISL_7351726, EPI_ISL_7351727, EPI_ISL_7351728, EPI_ISL_7351729, EPI_ISL_7351730, EPI_ISL_7351731, EPI_ISL_7351732, EPI_ISL_7351733, EPI_ISL_7351734, EPI_ISL_7351735, EPI_ISL_7351736, EPI_ISL_7351737, EPI_ISL_7351738, EPI_ISL_7351739, EPI_ISL_7351740, EPI_ISL_7351741, EPI_ISL_7351742, EPI_ISL_7351743, EPI_ISL_7351744, EPI_ISL_7351745, EPI_ISL_7351746, EPI_ISL_7351747, EPI_ISL_7351748, EPI_ISL_7351749, EPI_ISL_7351750, EPI_ISL_7351751, EPI_ISL_7351752, EPI_ISL_7351753, EPI_ISL_7351754, EPI_ISL_7351755, EPI_ISL_7351756, EPI_ISL_7351757, EPI_ISL_7351758, EPI_ISL_7351759, EPI_ISL_7351760, EPI_ISL_7351761, EPI_ISL_7351762, EPI_ISL_7351763, EPI_ISL_7351764, EPI_ISL_7351765, EPI_ISL_7351766, EPI_ISL_7351767, EPI_ISL_7351768, EPI_ISL_7351769, EPI_ISL_7351770, EPI_ISL_7351771, EPI_ISL_7351772, EPI_ISL_7351773, EPI_ISL_7351774, EPI_ISL_7351775, EPI_ISL_7351776, EPI_ISL_7351777, EPI_ISL_7351778, EPI_ISL_7351779, EPI_ISL_7351780, EPI_ISL_7351781, EPI_ISL_7351782, EPI_ISL_7351783, EPI_ISL_7351784, EPI_ISL_7351785, EPI_ISL_7351786, EPI_ISL_7351787, EPI_ISL_7351788, EPI_ISL_7351789, EPI_ISL_7351790, EPI_ISL_7351791, EPI_ISL_7351792, EPI_ISL_7351793, EPI_ISL_7351794, EPI_ISL_7351795, EPI_ISL_7351796, EPI_ISL_7351797, EPI_ISL_7351798, EPI_ISL_7351799, EPI_ISL_7351800, EPI_ISL_7351801, EPI_ISL_7351802, EPI_ISL_7351803, EPI_ISL_7351804, EPI_ISL_7351805, EPI_ISL_7351806, EPI_ISL_7351807, EPI_ISL_7351808, EPI_ISL_7351809, EPI_ISL_7351810, EPI_ISL_7351811, EPI_ISL_7351812, EPI_ISL_7351813, EPI_ISL_7351814, EPI_ISL_7351815, EPI_ISL_7351816, EPI_ISL_7351817, EPI_ISL_7351818, EPI_ISL_7351819, EPI_ISL_7351820, EPI_ISL_7351821, EPI_ISL_7351822, EPI_ISL_7351823, E |                                                                                                                                                         |                                                                                                                                                            |                                                                                                                                                                                                                                                                                                                                                                                                                                                                                                                                                    |

|                                                                                                                                                                                                                                                                                                                                                                                                                                                                                                                                                                                                                                                                                                                                                                                                                                                                                                                                                                                                                                                                                                                                                                                                                                                                                                                                                                                                                                                                                                                                                                                                                                                                                                                                                                                                                                                                                                                                                                                                                                                                                                                                                                                                                                                                                                                                                                                                                                                                                                                                                                                                                                                                                                                                                                                                                                                                                                                                                                                                                                                                                                                                                                                                                                                                                                                                                                                                                                                                                                                                                                          |                                                                                                            |                                                                                                                                              |                                                                                                                                                                                                                                                                                                                                                                                                                                                                                                                                                                                            |
|--------------------------------------------------------------------------------------------------------------------------------------------------------------------------------------------------------------------------------------------------------------------------------------------------------------------------------------------------------------------------------------------------------------------------------------------------------------------------------------------------------------------------------------------------------------------------------------------------------------------------------------------------------------------------------------------------------------------------------------------------------------------------------------------------------------------------------------------------------------------------------------------------------------------------------------------------------------------------------------------------------------------------------------------------------------------------------------------------------------------------------------------------------------------------------------------------------------------------------------------------------------------------------------------------------------------------------------------------------------------------------------------------------------------------------------------------------------------------------------------------------------------------------------------------------------------------------------------------------------------------------------------------------------------------------------------------------------------------------------------------------------------------------------------------------------------------------------------------------------------------------------------------------------------------------------------------------------------------------------------------------------------------------------------------------------------------------------------------------------------------------------------------------------------------------------------------------------------------------------------------------------------------------------------------------------------------------------------------------------------------------------------------------------------------------------------------------------------------------------------------------------------------------------------------------------------------------------------------------------------------------------------------------------------------------------------------------------------------------------------------------------------------------------------------------------------------------------------------------------------------------------------------------------------------------------------------------------------------------------------------------------------------------------------------------------------------------------------------------------------------------------------------------------------------------------------------------------------------------------------------------------------------------------------------------------------------------------------------------------------------------------------------------------------------------------------------------------------------------------------------------------------------------------------------------------------------|------------------------------------------------------------------------------------------------------------|----------------------------------------------------------------------------------------------------------------------------------------------|--------------------------------------------------------------------------------------------------------------------------------------------------------------------------------------------------------------------------------------------------------------------------------------------------------------------------------------------------------------------------------------------------------------------------------------------------------------------------------------------------------------------------------------------------------------------------------------------|
| EPI_ISL_7154400, EPI_ISL_7154401, EPI_ISL_7154402, EPI_ISL_7500444                                                                                                                                                                                                                                                                                                                                                                                                                                                                                                                                                                                                                                                                                                                                                                                                                                                                                                                                                                                                                                                                                                                                                                                                                                                                                                                                                                                                                                                                                                                                                                                                                                                                                                                                                                                                                                                                                                                                                                                                                                                                                                                                                                                                                                                                                                                                                                                                                                                                                                                                                                                                                                                                                                                                                                                                                                                                                                                                                                                                                                                                                                                                                                                                                                                                                                                                                                                                                                                                                                       | Mako Medical                                                                                               | Centers for Disease Control and Prevention Division of Viral Diseases, Pathogen Discovery                                                    | Benjamin Rambo-Martin; Christopher Gulvick; Clinton Paden; Dakota Howard; Dhwani Batra; Duncan MacCannell; Erisa Sula; Jason Caravas; Kristine Lacke; Lauren Moon; Matthew Schmerer; Matthew Tugwell; Peter Cook; Scott Sammons; Shatavia Morrison; Tymeckia Kendall; Victoria Caban Figueroa; Yvette Unoarumhi                                                                                                                                                                                                                                                                            |
| EPI_ISL_7464406, EPI_ISL_7464407, EPI_ISL_7464408                                                                                                                                                                                                                                                                                                                                                                                                                                                                                                                                                                                                                                                                                                                                                                                                                                                                                                                                                                                                                                                                                                                                                                                                                                                                                                                                                                                                                                                                                                                                                                                                                                                                                                                                                                                                                                                                                                                                                                                                                                                                                                                                                                                                                                                                                                                                                                                                                                                                                                                                                                                                                                                                                                                                                                                                                                                                                                                                                                                                                                                                                                                                                                                                                                                                                                                                                                                                                                                                                                                        | Malawi Liverpool Wellcome Trust Clinical Research Program                                                  | Malawi Liverpool Wellcome Trust Clinical Research Program                                                                                    | Belson Kutambe; Ben Morton; Catherine Anscombe; Kondwani Jambo; Mavis Menyere; Philip Ashton; Sam Lissauer                                                                                                                                                                                                                                                                                                                                                                                                                                                                                 |
| EPI_ISL_7404794                                                                                                                                                                                                                                                                                                                                                                                                                                                                                                                                                                                                                                                                                                                                                                                                                                                                                                                                                                                                                                                                                                                                                                                                                                                                                                                                                                                                                                                                                                                                                                                                                                                                                                                                                                                                                                                                                                                                                                                                                                                                                                                                                                                                                                                                                                                                                                                                                                                                                                                                                                                                                                                                                                                                                                                                                                                                                                                                                                                                                                                                                                                                                                                                                                                                                                                                                                                                                                                                                                                                                          | Maryland Genomics, Institute for Genome Sciences, University of Maryland School of Medicine                | Maryland Genomics, Institute for Genome Sciences, University of Maryland School of Medicine                                                  | Claire M; Fraser; George; Hazen; Holly; Humphrys; Jacques; Jain; Kevin; Kranthi; Lisa D; Luke J; Mike; Ott; Ravel; Regan; Roussey; Sadzewicz; Sandra; Tallon; Tracy; Vavikolanu                                                                                                                                                                                                                                                                                                                                                                                                            |
| EPI_ISL_7469697                                                                                                                                                                                                                                                                                                                                                                                                                                                                                                                                                                                                                                                                                                                                                                                                                                                                                                                                                                                                                                                                                                                                                                                                                                                                                                                                                                                                                                                                                                                                                                                                                                                                                                                                                                                                                                                                                                                                                                                                                                                                                                                                                                                                                                                                                                                                                                                                                                                                                                                                                                                                                                                                                                                                                                                                                                                                                                                                                                                                                                                                                                                                                                                                                                                                                                                                                                                                                                                                                                                                                          | Mass General Brigham                                                                                       | Mass General Brigham                                                                                                                         | A.E.; Adams, G.; Anahar, M.; B.L.; B.W.; Bauer, M.; Birren; Branda, J.; Carter, A.; Cerrato, F.; Chaluvadi, S.; Chapman; Cusick, C.; D.J.; DeRuff, K.; E. and Sabeti; Flowers, K.; Gallagher, G.; Gladden-Young, A.; Gnirke, A.; Harris, J.; J.E.; K.J.; LaRoque, R.; Lagerborg, K.; Lemieux; Lin; Loreth, C.; MacInnis; Neumann, A.; Normandin, E.; P.C.; Park; Pierce, V.; Reilly, S.; Rosenberg; Rudy, M.; Ryan, E.; S.B.; Shaw, B.; Siddle; Slater, D.; Smole, S.; Tomkins-Tinch, C.; Turbett, S.; Uddin, R. Alexander Graf; Helmut Blum; Max Muenchhoff; Oliver Keppler; Stefan Krebs |
| EPI_ISL_6886593, EPI_ISL_6886594, EPI_ISL_6886595, EPI_ISL_6886596                                                                                                                                                                                                                                                                                                                                                                                                                                                                                                                                                                                                                                                                                                                                                                                                                                                                                                                                                                                                                                                                                                                                                                                                                                                                                                                                                                                                                                                                                                                                                                                                                                                                                                                                                                                                                                                                                                                                                                                                                                                                                                                                                                                                                                                                                                                                                                                                                                                                                                                                                                                                                                                                                                                                                                                                                                                                                                                                                                                                                                                                                                                                                                                                                                                                                                                                                                                                                                                                                                       | Max von Pettenkofer Institute, Virology, National Reference Center for Retroviruses, LMU Munich            | Laboratory for Functional Genome Analysis; Dept. Genomics; Gene Center of the LMU Munich                                                     |                                                                                                                                                                                                                                                                                                                                                                                                                                                                                                                                                                                            |
| EPI_ISL_7267259, EPI_ISL_740216, EPI_ISL_7470264, EPI_ISL_7470331                                                                                                                                                                                                                                                                                                                                                                                                                                                                                                                                                                                                                                                                                                                                                                                                                                                                                                                                                                                                                                                                                                                                                                                                                                                                                                                                                                                                                                                                                                                                                                                                                                                                                                                                                                                                                                                                                                                                                                                                                                                                                                                                                                                                                                                                                                                                                                                                                                                                                                                                                                                                                                                                                                                                                                                                                                                                                                                                                                                                                                                                                                                                                                                                                                                                                                                                                                                                                                                                                                        | Medical Microbiology Unit, Department for Laboratory Medicine, Drammen Hospital, Vestre Viken Health Trust | Norwegian Institute of Public Health, Department of Virology                                                                                 | Atiya R Ali; Debech Nadia; Engebretsen Serina Beate; Garcia Llorentea Ignacio; Hilde Elshaug; Hilde Vollan; Jon Bråte; Kamilla Heddeland Instefjord; Karoline Bragstad; Kathrine Stene-Johansen; Line Victoria Moen; Marie Paulsen Madsen; Olav Hungnes; Pedersen Benedikte Nevjen; Rasmus Riis Kopperud                                                                                                                                                                                                                                                                                   |
| EPI_ISL_7443804, EPI_ISL_7443805, EPI_ISL_7443809, EPI_ISL_7443815                                                                                                                                                                                                                                                                                                                                                                                                                                                                                                                                                                                                                                                                                                                                                                                                                                                                                                                                                                                                                                                                                                                                                                                                                                                                                                                                                                                                                                                                                                                                                                                                                                                                                                                                                                                                                                                                                                                                                                                                                                                                                                                                                                                                                                                                                                                                                                                                                                                                                                                                                                                                                                                                                                                                                                                                                                                                                                                                                                                                                                                                                                                                                                                                                                                                                                                                                                                                                                                                                                       | Medizinische Laboratorien Düsseldorf                                                                       | Robert Koch Institute                                                                                                                        |                                                                                                                                                                                                                                                                                                                                                                                                                                                                                                                                                                                            |
| EPI_ISL_7416680                                                                                                                                                                                                                                                                                                                                                                                                                                                                                                                                                                                                                                                                                                                                                                                                                                                                                                                                                                                                                                                                                                                                                                                                                                                                                                                                                                                                                                                                                                                                                                                                                                                                                                                                                                                                                                                                                                                                                                                                                                                                                                                                                                                                                                                                                                                                                                                                                                                                                                                                                                                                                                                                                                                                                                                                                                                                                                                                                                                                                                                                                                                                                                                                                                                                                                                                                                                                                                                                                                                                                          | Medizinisches Versorgungszentrum für Labormedizin und Mikrobiologie Ruhr GmbH - mvzmV RUHR GmbH            | Robert Koch Institute                                                                                                                        |                                                                                                                                                                                                                                                                                                                                                                                                                                                                                                                                                                                            |
| EPI_ISL_6854346, EPI_ISL_6854347, EPI_ISL_6854348                                                                                                                                                                                                                                                                                                                                                                                                                                                                                                                                                                                                                                                                                                                                                                                                                                                                                                                                                                                                                                                                                                                                                                                                                                                                                                                                                                                                                                                                                                                                                                                                                                                                                                                                                                                                                                                                                                                                                                                                                                                                                                                                                                                                                                                                                                                                                                                                                                                                                                                                                                                                                                                                                                                                                                                                                                                                                                                                                                                                                                                                                                                                                                                                                                                                                                                                                                                                                                                                                                                        | Microbiologia e Virologia Cotugno                                                                          | Microbiologia e Virologia Cotugno                                                                                                            | Antonio Canonico; Antonio Fascione; Claudia Tiberio; Enza Mallardo; Francesco Nappo; Giovanni D'Auria; Giuseppe di Gennaro; Ilaria Cavallaro; Luigi Atripaldi                                                                                                                                                                                                                                                                                                                                                                                                                              |
| EPI_ISL_7462324                                                                                                                                                                                                                                                                                                                                                                                                                                                                                                                                                                                                                                                                                                                                                                                                                                                                                                                                                                                                                                                                                                                                                                                                                                                                                                                                                                                                                                                                                                                                                                                                                                                                                                                                                                                                                                                                                                                                                                                                                                                                                                                                                                                                                                                                                                                                                                                                                                                                                                                                                                                                                                                                                                                                                                                                                                                                                                                                                                                                                                                                                                                                                                                                                                                                                                                                                                                                                                                                                                                                                          | Microbiology Department, University Hospital Araba                                                         | Microbiology Department, University Hospital Donostia                                                                                        | Cilla G.; Gomez M; Hernaez S; Marimon JM; Martin-Peñaranda T; Montes M; Piñeiro L; Sorrairain A                                                                                                                                                                                                                                                                                                                                                                                                                                                                                            |
| EPI_ISL_7502103, EPI_ISL_7502107                                                                                                                                                                                                                                                                                                                                                                                                                                                                                                                                                                                                                                                                                                                                                                                                                                                                                                                                                                                                                                                                                                                                                                                                                                                                                                                                                                                                                                                                                                                                                                                                                                                                                                                                                                                                                                                                                                                                                                                                                                                                                                                                                                                                                                                                                                                                                                                                                                                                                                                                                                                                                                                                                                                                                                                                                                                                                                                                                                                                                                                                                                                                                                                                                                                                                                                                                                                                                                                                                                                                         | Microbiology Department, Complejo Hospitalario Universitario de Vigo                                       | Microbiology Department, Complejo Hospitalario Universitario de Vigo                                                                         | Alvarez M; Cabrera JJ; Carballo R; Cortizo S; Davina C; Martinez L; Mediero G; Pena I; Perez S; Potel C; Regueiro B; Rey S; Vasallo FJ; del-Campo V                                                                                                                                                                                                                                                                                                                                                                                                                                        |
| EPI_ISL_7496678                                                                                                                                                                                                                                                                                                                                                                                                                                                                                                                                                                                                                                                                                                                                                                                                                                                                                                                                                                                                                                                                                                                                                                                                                                                                                                                                                                                                                                                                                                                                                                                                                                                                                                                                                                                                                                                                                                                                                                                                                                                                                                                                                                                                                                                                                                                                                                                                                                                                                                                                                                                                                                                                                                                                                                                                                                                                                                                                                                                                                                                                                                                                                                                                                                                                                                                                                                                                                                                                                                                                                          | Minnesota Department of Health, Public Health Laboratory                                                   | Minnesota Department of Health, Public Health Laboratory                                                                                     | Alyssa Mondelli; Elizabeth Horn; Jacob Garfin; Kelly Pung; Matt Plumb; Sarah Namugenyi; and Xiong Wang                                                                                                                                                                                                                                                                                                                                                                                                                                                                                     |
| EPI_ISL_6963002                                                                                                                                                                                                                                                                                                                                                                                                                                                                                                                                                                                                                                                                                                                                                                                                                                                                                                                                                                                                                                                                                                                                                                                                                                                                                                                                                                                                                                                                                                                                                                                                                                                                                                                                                                                                                                                                                                                                                                                                                                                                                                                                                                                                                                                                                                                                                                                                                                                                                                                                                                                                                                                                                                                                                                                                                                                                                                                                                                                                                                                                                                                                                                                                                                                                                                                                                                                                                                                                                                                                                          | Mirialis                                                                                                   | CNR Virus des Infections Respiratoires - France SUD                                                                                          | Antoine Oblette; Antonin Bal; Bruno Lina; Bruno Simon; Camille Delcloitre; Eva Oddoux; Florence Morfin; Gregory Destras; Gwendolynne Burfin; Hadrien Regue; Hervé Crehalet; Jean François Bore; Jeremy Cordier; Laurence Josset; Martine Valette; Noémie Fessy; Quentin Semanas; Richard Chalignac; Thibault Corsin; Thibault Gouiran Danish Covid-19 Genome Consortium                                                                                                                                                                                                                    |
| EPI_ISL_7193991, EPI_ISL_7286479, EPI_ISL_7516233, EPI_ISL_7519931, EPI_ISL_7527590, EPI_ISL_7527959                                                                                                                                                                                                                                                                                                                                                                                                                                                                                                                                                                                                                                                                                                                                                                                                                                                                                                                                                                                                                                                                                                                                                                                                                                                                                                                                                                                                                                                                                                                                                                                                                                                                                                                                                                                                                                                                                                                                                                                                                                                                                                                                                                                                                                                                                                                                                                                                                                                                                                                                                                                                                                                                                                                                                                                                                                                                                                                                                                                                                                                                                                                                                                                                                                                                                                                                                                                                                                                                     | Molekylær Medicinsk Afdeling, Aarhus University Hospital, Aarhus, Denmark                                  | Statens Serum Institut Bioinformatics and Microbial Genomics                                                                                 |                                                                                                                                                                                                                                                                                                                                                                                                                                                                                                                                                                                            |
| EPI_ISL_7501186                                                                                                                                                                                                                                                                                                                                                                                                                                                                                                                                                                                                                                                                                                                                                                                                                                                                                                                                                                                                                                                                                                                                                                                                                                                                                                                                                                                                                                                                                                                                                                                                                                                                                                                                                                                                                                                                                                                                                                                                                                                                                                                                                                                                                                                                                                                                                                                                                                                                                                                                                                                                                                                                                                                                                                                                                                                                                                                                                                                                                                                                                                                                                                                                                                                                                                                                                                                                                                                                                                                                                          | Mount Auburn Hospital via Lahey Hospital                                                                   | New England Biolabs                                                                                                                          | Abel, G.; B.W.; C.J.; Colgrove, R.; Duncan, R.; Elfahal, M.; Flynn; Heim, K.; Karolides, M.; L. and Langhorst; Michaels, L.; Pinet, K.; Skelton, T.; Sun                                                                                                                                                                                                                                                                                                                                                                                                                                   |
| EPI_ISL_7545652, EPI_ISL_7545653, EPI_ISL_7545654, EPI_ISL_7545658, EPI_ISL_7545660, EPI_ISL_7545661, EPI_ISL_7545662, EPI_ISL_7545663, EPI_ISL_7545664, EPI_ISL_7545665, EPI_ISL_7545666, EPI_ISL_7545667, EPI_ISL_7545668, EPI_ISL_7545669, EPI_ISL_7545670, EPI_ISL_7545671, EPI_ISL_7545673, EPI_ISL_7545674, EPI_ISL_7545675                                                                                                                                                                                                                                                                                                                                                                                                                                                                                                                                                                                                                                                                                                                                                                                                                                                                                                                                                                                                                                                                                                                                                                                                                                                                                                                                                                                                                                                                                                                                                                                                                                                                                                                                                                                                                                                                                                                                                                                                                                                                                                                                                                                                                                                                                                                                                                                                                                                                                                                                                                                                                                                                                                                                                                                                                                                                                                                                                                                                                                                                                                                                                                                                                                        | see above                                                                                                  | NHLSt Livingstone Laboratory                                                                                                                 | Arisha Maharaj; Giandhari J; Naidoo Y; Oluwakemi Laguda-Akingba and Nokukhanya Mdlalose; Pillay S; Ramphal U; Ramphal Y; San JE; Tegally H; Tshiabulla D; Wilkinson E; de Oliveira T                                                                                                                                                                                                                                                                                                                                                                                                       |
| EPI_ISL_7381208, EPI_ISL_7381209, EPI_ISL_7381210, EPI_ISL_7381211, EPI_ISL_7381212, EPI_ISL_7381213, EPI_ISL_7381214, EPI_ISL_7381215, EPI_ISL_7381216, EPI_ISL_7381217, EPI_ISL_7381218, EPI_ISL_7381219, EPI_ISL_7381220, EPI_ISL_7381221, EPI_ISL_7381222                                                                                                                                                                                                                                                                                                                                                                                                                                                                                                                                                                                                                                                                                                                                                                                                                                                                                                                                                                                                                                                                                                                                                                                                                                                                                                                                                                                                                                                                                                                                                                                                                                                                                                                                                                                                                                                                                                                                                                                                                                                                                                                                                                                                                                                                                                                                                                                                                                                                                                                                                                                                                                                                                                                                                                                                                                                                                                                                                                                                                                                                                                                                                                                                                                                                                                            | see above                                                                                                  | NHLSt Port Elizabeth Laboratory                                                                                                              | Arisha Maharaj; Giandhari J; Moir M; Naidoo Y; Oluwakemi Laguda-Akingba and Nokukhanya Mdlalose; Pillay S; Ramphal U; Ramphal Y; San JE; Tegally H; Tshiabulla D; Wilkinson E; de Oliveira T; van Wyk S                                                                                                                                                                                                                                                                                                                                                                                    |
| EPI_ISL_7462390, EPI_ISL_7462391, EPI_ISL_7462392, EPI_ISL_7462393, EPI_ISL_7462397, EPI_ISL_7462398, EPI_ISL_7462399, EPI_ISL_7462400, EPI_ISL_7462401, EPI_ISL_7462402, EPI_ISL_7462403, EPI_ISL_7462404                                                                                                                                                                                                                                                                                                                                                                                                                                                                                                                                                                                                                                                                                                                                                                                                                                                                                                                                                                                                                                                                                                                                                                                                                                                                                                                                                                                                                                                                                                                                                                                                                                                                                                                                                                                                                                                                                                                                                                                                                                                                                                                                                                                                                                                                                                                                                                                                                                                                                                                                                                                                                                                                                                                                                                                                                                                                                                                                                                                                                                                                                                                                                                                                                                                                                                                                                               | see above                                                                                                  | NHLSt Universitas Academic                                                                                                                   | D Goedhals; Emmanuel Ogunbayo; MM Nyaga; MT Mogotsi; P Nthiga; PA Bestser; Shannon Wilson; Susan Engelbrecht; T de Oliveira; Tongai Maponga; Wolfgang Preiser                                                                                                                                                                                                                                                                                                                                                                                                                              |
| EPI_ISL_7285023                                                                                                                                                                                                                                                                                                                                                                                                                                                                                                                                                                                                                                                                                                                                                                                                                                                                                                                                                                                                                                                                                                                                                                                                                                                                                                                                                                                                                                                                                                                                                                                                                                                                                                                                                                                                                                                                                                                                                                                                                                                                                                                                                                                                                                                                                                                                                                                                                                                                                                                                                                                                                                                                                                                                                                                                                                                                                                                                                                                                                                                                                                                                                                                                                                                                                                                                                                                                                                                                                                                                                          | National Centre for Disease Control (NCDC) Biotechnology Division, Delhi                                   | NCDC Delhi, Biotechnology Division INSACOG                                                                                                   | Hema Gogia; Hemlata Lall; Kalaiaarasan Ponnusamy; Mahesh S Dhar; Manoj K Singh; Meena Datta; Partha Rakshit; Preeti Madan; Priyanka Singh; Radhakrishnan V. S; Robin Marwal; Sandhya Kabra; Sujeet K Singh; Uma Sharma                                                                                                                                                                                                                                                                                                                                                                     |
| EPI_ISL_7548907, EPI_ISL_7548908, EPI_ISL_7548911, EPI_ISL_7548912, EPI_ISL_7548913, EPI_ISL_7548915, EPI_ISL_7548916, EPI_ISL_7548918, EPI_ISL_7548919, EPI_ISL_7548920, EPI_ISL_7548921, EPI_ISL_7548922, EPI_ISL_7548924, EPI_ISL_7548925, EPI_ISL_7548926, EPI_ISL_7548927, EPI_ISL_7548928, EPI_ISL_7548929, EPI_ISL_7548930, EPI_ISL_7548932, EPI_ISL_7548933, EPI_ISL_7548934, EPI_ISL_7548935, EPI_ISL_7548936, EPI_ISL_7548937, EPI_ISL_7548938, EPI_ISL_7548939                                                                                                                                                                                                                                                                                                                                                                                                                                                                                                                                                                                                                                                                                                                                                                                                                                                                                                                                                                                                                                                                                                                                                                                                                                                                                                                                                                                                                                                                                                                                                                                                                                                                                                                                                                                                                                                                                                                                                                                                                                                                                                                                                                                                                                                                                                                                                                                                                                                                                                                                                                                                                                                                                                                                                                                                                                                                                                                                                                                                                                                                                                | see above                                                                                                  | National Health Laboratory                                                                                                                   | Boitumelo Zuze; Botshelo Radibe; Dorcas Maruapula; Doreen Ditshwanelo; Joseph Makhema; Keoratlle Ntshambiwa; Kgomoiso Moruisi; Legodile Koepeile; Mosepele Mosepele; Mphaphi B. Mbulawa; Ontlametse T. Bareng; Pamela Smith-Lawrence; Roger Shapiro; Sefetogi Ramaolaga; Shahin Lockman; Sikhulile Moyo; Simani Gaseitsiwe; Thongotho Mphoyakgosi; Wonderful T. Choga                                                                                                                                                                                                                      |
| EPI_ISL_6795195, EPI_ISL_6795199, EPI_ISL_6795202, EPI_ISL_6795203, EPI_ISL_6795406, EPI_ISL_7015210, EPI_ISL_7015212, EPI_ISL_7015216, EPI_ISL_7015223, EPI_ISL_7015224, EPI_ISL_7015226, EPI_ISL_7015229, EPI_ISL_7015230, EPI_ISL_7310589, EPI_ISL_7310595, EPI_ISL_7310605, EPI_ISL_7310613, EPI_ISL_7310622, EPI_ISL_7310630, EPI_ISL_7310631, EPI_ISL_7310636, EPI_ISL_7310643, EPI_ISL_7310648, EPI_ISL_7310658, EPI_ISL_7310666, EPI_ISL_7310675, EPI_ISL_7310685, EPI_ISL_7310703, EPI_ISL_7310710, EPI_ISL_7310719, EPI_ISL_7310725, EPI_ISL_7310733, EPI_ISL_7310742, EPI_ISL_7310747, EPI_ISL_7358050, EPI_ISL_7358051, EPI_ISL_7358052, EPI_ISL_7358053, EPI_ISL_7358054, EPI_ISL_7358055, EPI_ISL_7358056, EPI_ISL_7358057, EPI_ISL_7358058, EPI_ISL_7358059, EPI_ISL_7358064, EPI_ISL_7358065, EPI_ISL_7358066, EPI_ISL_7358067, EPI_ISL_7358068, EPI_ISL_7358069, EPI_ISL_7358070, EPI_ISL_7358071, EPI_ISL_7358072, EPI_ISL_7358073, EPI_ISL_7358074, EPI_ISL_7358075, EPI_ISL_7358076, EPI_ISL_7358077, EPI_ISL_7358078, EPI_ISL_7358079, EPI_ISL_7358080, EPI_ISL_7358081, EPI_ISL_7358082, EPI_ISL_7358083, EPI_ISL_7358084, EPI_ISL_7358085, EPI_ISL_7358086, EPI_ISL_7358089, EPI_ISL_7358090, EPI_ISL_7358091, EPI_ISL_7358092, EPI_ISL_7358093, EPI_ISL_7381192, EPI_ISL_7381193, EPI_ISL_7381194, EPI_ISL_7381195, EPI_ISL_7381196, EPI_ISL_7381197, EPI_ISL_7381198, EPI_ISL_7381199, EPI_ISL_7381200, EPI_ISL_7381201, EPI_ISL_7381202, EPI_ISL_7381203, EPI_ISL_7381204, EPI_ISL_7381205, EPI_ISL_7381206, EPI_ISL_7381207, EPI_ISL_7545676, EPI_ISL_7545677, EPI_ISL_7545678, EPI_ISL_7545679, EPI_ISL_7545680, EPI_ISL_7545681, EPI_ISL_7545682, EPI_ISL_7545683, EPI_ISL_7545684, EPI_ISL_7545685, EPI_ISL_7545686, EPI_ISL_7545687, EPI_ISL_7545688, EPI_ISL_7545689, EPI_ISL_7545690, EPI_ISL_7545691, EPI_ISL_7545692, EPI_ISL_7545693, EPI_ISL_7545694, EPI_ISL_7545695, EPI_ISL_7545696, EPI_ISL_7545698, EPI_ISL_7545699, EPI_ISL_7545700, EPI_ISL_7545701, EPI_ISL_7545702, EPI_ISL_7545703, EPI_ISL_7545704, EPI_ISL_7545705, EPI_ISL_7545706, EPI_ISL_7545707, EPI_ISL_7545708, EPI_ISL_7545709, EPI_ISL_7545710, EPI_ISL_7545711, EPI_ISL_7545712, EPI_ISL_7545713, EPI_ISL_7545714, EPI_ISL_7545715, EPI_ISL_7545716, EPI_ISL_7545717, EPI_ISL_7545718, EPI_ISL_7545719, EPI_ISL_7545720, EPI_ISL_7545721, EPI_ISL_7545722, EPI_ISL_7545723, EPI_ISL_7545724, EPI_ISL_7545725, EPI_ISL_7545726, EPI_ISL_7545727, EPI_ISL_7545728, EPI_ISL_7545729, EPI_ISL_7545730, EPI_ISL_7545731, EPI_ISL_7545732, EPI_ISL_7545733, EPI_ISL_7545734, EPI_ISL_7545735, EPI_ISL_7545736, EPI_ISL_7545737, EPI_ISL_7545738, EPI_ISL_7545739, EPI_ISL_7545742, EPI_ISL_7545743, EPI_ISL_7545744, EPI_ISL_7545745, EPI_ISL_7545746, EPI_ISL_7545747, EPI_ISL_7545748, EPI_ISL_7545749, EPI_ISL_7545750, EPI_ISL_7545751, EPI_ISL_7545752, EPI_ISL_7545753, EPI_ISL_7545754, EPI_ISL_7545755, EPI_ISL_7545756, EPI_ISL_7545757, EPI_ISL_7545758, EPI_ISL_7545759, EPI_ISL_7545760, EPI_ISL_7545761, EPI_ISL_7545762, EPI_ISL_7545763, EPI_ISL_7545764, EPI_ISL_7545765, EPI_ISL_7545766, EPI_ISL_7545767, EPI_ISL_7545768, EPI_ISL_7545769, EPI_ISL_7545770, EPI_ISL_7545771, EPI_ISL_7545772, EPI_ISL_7545773, EPI_ISL_7545774, EPI_ISL_7545775, EPI_ISL_7545776, EPI_ISL_7545777, EPI_ISL_7545778, EPI_ISL_7545779, EPI_ISL_7545780, EPI_ISL_7545781, EPI_ISL_7545783, EPI_ISL_7545784, EPI_ISL_7545785, EPI_ISL_7545787, EPI_ISL_7545788, EPI_ISL_7545789, EPI_ISL_7545790, EPI_ISL_7545791, EPI_ISL_7545792, EPI_ISL_7545793, EPI_ISL_7545794 | see above                                                                                                  | National Health Laboratory Service, Kwazulu-Natal, South Africa                                                                              | Arisha Maharaj; Giandhari J; Moir M; Naidoo Y; Nokukhanya Mdlalose; Pillay S; Ramphal U; Ramphal Y; San JE; Tegally H; Tshiabulla D; Wilkinson E; de Oliveira T; van Wyk S                                                                                                                                                                                                                                                                                                                                                                                                                 |
| EPI_ISL_6829557                                                                                                                                                                                                                                                                                                                                                                                                                                                                                                                                                                                                                                                                                                                                                                                                                                                                                                                                                                                                                                                                                                                                                                                                                                                                                                                                                                                                                                                                                                                                                                                                                                                                                                                                                                                                                                                                                                                                                                                                                                                                                                                                                                                                                                                                                                                                                                                                                                                                                                                                                                                                                                                                                                                                                                                                                                                                                                                                                                                                                                                                                                                                                                                                                                                                                                                                                                                                                                                                                                                                                          | National Health Laboratory Service, Kwazulu-Natal, South Africa                                            | KRISP, KZN Research Innovation and Sequencing Platform                                                                                       | Arisha Maharaj; Giandhari J; Lessells R; Moir M; Naidoo Y; Nokukhanya M; Pillay S; Ramphal U; Ramphal Y; San JE; Tegally H; Tshiabulla D; Wilkinson E; de Oliveira T                                                                                                                                                                                                                                                                                                                                                                                                                       |
| EPI_ISL_6795188, EPI_ISL_6795189, EPI_ISL_6795190, EPI_ISL_6795191, EPI_ISL_6795192, EPI_ISL_6795193                                                                                                                                                                                                                                                                                                                                                                                                                                                                                                                                                                                                                                                                                                                                                                                                                                                                                                                                                                                                                                                                                                                                                                                                                                                                                                                                                                                                                                                                                                                                                                                                                                                                                                                                                                                                                                                                                                                                                                                                                                                                                                                                                                                                                                                                                                                                                                                                                                                                                                                                                                                                                                                                                                                                                                                                                                                                                                                                                                                                                                                                                                                                                                                                                                                                                                                                                                                                                                                                     | National Health Laboratory Services, Virology                                                              | CERI, Centre for Epidemic Response and Innovation, Stellenbosch University and KRISP, KZN Research Innovation and Sequencing Platform, UKZN. | Arisha Maharaj; Florette Treurnicht; Giandhari J; Kathleen Subramoney; Naidoo Y; Pillay S; Ramphal U; Ramphal Y; San JE; Tegally H; Tshiabulla D; Wilkinson E; de Oliveira T                                                                                                                                                                                                                                                                                                                                                                                                               |
| EPI_ISL_6699728, EPI_ISL_6699729, EPI_ISL_6699730, EPI_ISL_6699731, EPI_ISL_6699732, EPI_ISL_6699733, EPI_ISL_6699734, EPI_ISL_6699735, EPI_ISL_6699736, EPI_ISL_6699737, EPI_ISL_6699738, EPI_ISL_6699739, EPI_ISL_6699740, EPI_ISL_6699741, EPI_ISL_6699742, EPI_ISL_6699743, EPI_ISL_6699744, EPI_ISL_6699745, EPI_ISL_6699746, EPI_ISL_6699747, EPI_ISL_6699748, EPI_ISL_6699749, EPI_ISL_6699750, EPI_ISL_6699751, EPI_ISL_6699752, EPI_ISL_6699753, EPI_ISL_6699754, EPI_ISL_6699755, EPI_ISL_6699756, EPI_ISL_6699757, EPI_ISL_6699758, EPI_ISL_6699759, EPI_ISL_6699760, EPI_ISL_6699761, EPI_ISL_6699762, EPI_ISL_6699763, EPI_ISL_6699764, EPI_ISL_6699765, EPI_ISL_6699766, EPI_ISL_6699767, EPI_ISL_6699768, EPI_ISL_6699769, EPI_ISL_6699770, EPI_ISL_6699771, EPI_ISL_6782043, EPI_ISL_6782055, EPI_ISL_6782056, EPI_ISL_6782071, EPI_ISL_6782079, EPI_ISL_6782080, EPI_ISL_6782084, EPI_ISL_6782090, EPI_ISL_6782092, EPI_ISL_6810482, EPI_ISL_6810483, EPI_ISL_6810484, EPI_ISL_6810485, EPI_ISL_6810486, EPI_ISL_6810487                                                                                                                                                                                                                                                                                                                                                                                                                                                                                                                                                                                                                                                                                                                                                                                                                                                                                                                                                                                                                                                                                                                                                                                                                                                                                                                                                                                                                                                                                                                                                                                                                                                                                                                                                                                                                                                                                                                                                                                                                                                                                                                                                                                                                                                                                                                                                                                                                                                                                                                                |                                                                                                            |                                                                                                                                              |                                                                                                                                                                                                                                                                                                                                                                                                                                                                                                                                                                                            |

|                                                                                                                                                                                                                                                                                                                                                                                                                                                                                                                                                                                                                                                                                                                                                                                                                                                                                                                                                                                                                                                                                                                                                                                                                                                                                                                                                                                                                                                                                                                                                                                                                                                                                                                                                                                                                                                                                                                                                            |                                                                                                                        |                                                                                                                                              |                                                                                                                                                                                                                                                                                                                                                                                                                                                                                            |                                                                                                                                                                                                                                                                                        |
|------------------------------------------------------------------------------------------------------------------------------------------------------------------------------------------------------------------------------------------------------------------------------------------------------------------------------------------------------------------------------------------------------------------------------------------------------------------------------------------------------------------------------------------------------------------------------------------------------------------------------------------------------------------------------------------------------------------------------------------------------------------------------------------------------------------------------------------------------------------------------------------------------------------------------------------------------------------------------------------------------------------------------------------------------------------------------------------------------------------------------------------------------------------------------------------------------------------------------------------------------------------------------------------------------------------------------------------------------------------------------------------------------------------------------------------------------------------------------------------------------------------------------------------------------------------------------------------------------------------------------------------------------------------------------------------------------------------------------------------------------------------------------------------------------------------------------------------------------------------------------------------------------------------------------------------------------------|------------------------------------------------------------------------------------------------------------------------|----------------------------------------------------------------------------------------------------------------------------------------------|--------------------------------------------------------------------------------------------------------------------------------------------------------------------------------------------------------------------------------------------------------------------------------------------------------------------------------------------------------------------------------------------------------------------------------------------------------------------------------------------|----------------------------------------------------------------------------------------------------------------------------------------------------------------------------------------------------------------------------------------------------------------------------------------|
| see above                                                                                                                                                                                                                                                                                                                                                                                                                                                                                                                                                                                                                                                                                                                                                                                                                                                                                                                                                                                                                                                                                                                                                                                                                                                                                                                                                                                                                                                                                                                                                                                                                                                                                                                                                                                                                                                                                                                                                  | National Health Laboratory Services, Virology, Charlotte Maxeke Johannesburg hospital, Parktown, Johannesburg, Gauteng | CERI, Centre for Epidemic Response and Innovation, Stellenbosch University and KRISP, KZN Research Innovation and Sequencing Platform, UKZN. | Amoaka D; Arisha Maharaj; Avani Bharuthram; Bester P; Bhiman J; Engelbrecht S; Everatt J; Florette Treurnicht; Goedhals D; Hardie D; Hsiao M; Iranzadeh A; Kathleen Subramoney; Lessells R; Makatini Z; Maponga T; Mdaloase N; Mlisana K; Moir M; NGS-SA (Scheepers C; Naidoo Y; Nkhensani Mtleni; Nyaga M) Giandhari J; Oluwakemi M; Pillay S; Preiser W; Ramphal U; Ramphal Y; San JE; Tegally H; Tshiabula D; Venter M; Wilkinson E; Williamson C; de Oliveira T; von Gottberg A        |                                                                                                                                                                                                                                                                                        |
| EPI_ISL_6939033, EPI_ISL_6939034, EPI_ISL_6939035, EPI_ISL_6939036, EPI_ISL_6939038, EPI_ISL_6939039, EPI_ISL_6939041, EPI_ISL_6939042, EPI_ISL_6939043, EPI_ISL_6939044, EPI_ISL_6939046, EPI_ISL_6939047, EPI_ISL_6939048, EPI_ISL_6939049, EPI_ISL_6939050, EPI_ISL_6939051, EPI_ISL_6939052, EPI_ISL_6939053, EPI_ISL_6939054, EPI_ISL_6939056, EPI_ISL_6939058, EPI_ISL_6939059, EPI_ISL_6939060, EPI_ISL_6939061, EPI_ISL_6939062, EPI_ISL_6939063, EPI_ISL_6939064, EPI_ISL_6939065, EPI_ISL_6939066, EPI_ISL_6939067, EPI_ISL_6939068                                                                                                                                                                                                                                                                                                                                                                                                                                                                                                                                                                                                                                                                                                                                                                                                                                                                                                                                                                                                                                                                                                                                                                                                                                                                                                                                                                                                              | see above                                                                                                              | National Influenza Centre                                                                                                                    | National Influenza Centre ; Benjamin B. Lindsey; Benjamin H. Foulkes; Bless Seyram Agbenyo; Bright Adu; Ernest Asiedu; Franklin Asiedu-Bekoe; Hilda Opoku Frempong; Ivy A. Asante; Joseph Oliver-Commey; Joyce Appiah-Kubi; Keren Okyereba Attiku; Linda Boatema; Lorreta Kwah; Mathew D. Parker; Michael Marks; Mildred Adusei-Poku; Quaneeta Mokhtar; Sharon Hsu; Thushan I de Silva; William K. Ampofo                                                                                  |                                                                                                                                                                                                                                                                                        |
| EPI_ISL_7456448, EPI_ISL_7456450, EPI_ISL_7456451, EPI_ISL_7456452, EPI_ISL_7456453, EPI_ISL_7456454, EPI_ISL_7456455, EPI_ISL_7456456, EPI_ISL_7456457                                                                                                                                                                                                                                                                                                                                                                                                                                                                                                                                                                                                                                                                                                                                                                                                                                                                                                                                                                                                                                                                                                                                                                                                                                                                                                                                                                                                                                                                                                                                                                                                                                                                                                                                                                                                    | see above                                                                                                              | National Institute For Communicable Diseases Of The National Health Laboratory Service                                                       | National Institute for Communicable Diseases of the National Health Laboratory Service                                                                                                                                                                                                                                                                                                                                                                                                     | Amoako DG; Bhiman JN; Everatt J; Ismail A; Mahlangu B; Mnguni A; Mohale T; Ntuli N; Scheepers C; Wolter N                                                                                                                                                                              |
| EPI_ISL_7418017                                                                                                                                                                                                                                                                                                                                                                                                                                                                                                                                                                                                                                                                                                                                                                                                                                                                                                                                                                                                                                                                                                                                                                                                                                                                                                                                                                                                                                                                                                                                                                                                                                                                                                                                                                                                                                                                                                                                            | National Institute of Infectious Diseases                                                                              | National Institute of Infectious Diseases                                                                                                    |                                                                                                                                                                                                                                                                                                                                                                                                                                                                                            | Harutaka Katano; Ken Maeda; Kentaro Itokawa; Makoto Kuroda; Shuetsu Fukushima; Shun Iida; Tadaki Suzuki; Tsuyoshi Sekizuka; Yudai Kuroda                                                                                                                                               |
| EPI_ISL_7021517, EPI_ISL_7074135                                                                                                                                                                                                                                                                                                                                                                                                                                                                                                                                                                                                                                                                                                                                                                                                                                                                                                                                                                                                                                                                                                                                                                                                                                                                                                                                                                                                                                                                                                                                                                                                                                                                                                                                                                                                                                                                                                                           | National Platform bis COVID ULB-IBC                                                                                    | National Platform bis COVID ULB-IBC                                                                                                          |                                                                                                                                                                                                                                                                                                                                                                                                                                                                                            | Arnaud Marchant; Benoit Haerlingen; Coralie Henin; Marie-Luce Delforge; Ricardo De Mendonça                                                                                                                                                                                            |
| EPI_ISL_7063764, EPI_ISL_7288348, EPI_ISL_7288357, EPI_ISL_7288375, EPI_ISL_7544936, EPI_ISL_7544937, EPI_ISL_7544938, EPI_ISL_7544939, EPI_ISL_7544940, EPI_ISL_7544941, EPI_ISL_7544942, EPI_ISL_7544947, EPI_ISL_7544948, EPI_ISL_7544949, EPI_ISL_7544950, EPI_ISL_7544953, EPI_ISL_7544954, EPI_ISL_7544956, EPI_ISL_7544960, EPI_ISL_7544963, EPI_ISL_7544964, EPI_ISL_7544965, EPI_ISL_7544969, EPI_ISL_7544971, EPI_ISL_7544972, EPI_ISL_7544974, EPI_ISL_7544975, EPI_ISL_7544980                                                                                                                                                                                                                                                                                                                                                                                                                                                                                                                                                                                                                                                                                                                                                                                                                                                                                                                                                                                                                                                                                                                                                                                                                                                                                                                                                                                                                                                                 | see above                                                                                                              | National Platform bis UMONS/Jolimont                                                                                                         | National Platform bis UMONS/Jolimont                                                                                                                                                                                                                                                                                                                                                                                                                                                       | Eric Tarantino; Florian Juszczak; Gautier Detry; Guillaume Bayon-Vicente; Laetitia Gheysen; Ruddy Wattiez                                                                                                                                                                              |
| EPI_ISL_7137310, EPI_ISL_7137311, EPI_ISL_7195620, EPI_ISL_7195621, EPI_ISL_7195622, EPI_ISL_7195623, EPI_ISL_7460338                                                                                                                                                                                                                                                                                                                                                                                                                                                                                                                                                                                                                                                                                                                                                                                                                                                                                                                                                                                                                                                                                                                                                                                                                                                                                                                                                                                                                                                                                                                                                                                                                                                                                                                                                                                                                                      | see above                                                                                                              | National Public Health Laboratory, National Centre for Infectious Diseases                                                                   | National Public Health Laboratory, National Centre for Infectious Diseases                                                                                                                                                                                                                                                                                                                                                                                                                 | Benny Yeo Ken Yee; Constance Chen; Dennis Loy Song Qi; Dimitar Kenanov; Grace Ngan Jie Yin; Katherine Ching Zi Yan; Kwan Ki Ko; Lin Cui; Mak Tze Minn; Niranjana Nagarajan; Raymond Tzer Pin Lin; Royce Ang; Samuel Loo; Sebastian Maurer Strohm; Suphaviilai Chayaporn; Zhenyang Zhou |
| EPI_ISL_7154394, EPI_ISL_7154403, EPI_ISL_7273097, EPI_ISL_7547734, EPI_ISL_7547735                                                                                                                                                                                                                                                                                                                                                                                                                                                                                                                                                                                                                                                                                                                                                                                                                                                                                                                                                                                                                                                                                                                                                                                                                                                                                                                                                                                                                                                                                                                                                                                                                                                                                                                                                                                                                                                                        | National Reference Laboratory, NCDC                                                                                    | National Reference Laboratory, Nigeria Centre for Disease Control                                                                            |                                                                                                                                                                                                                                                                                                                                                                                                                                                                                            | Catherine Okoi; Chimaobi Chukwu; Dr Ifedayo Adetifa; Dr Ndodo Nnaemeka; Dr Omoare Adesuyi; Nwando Mba; Olajumoke Babatunde; Olusola Anuoluwapo Akanbi; Oyeronke Ayansola                                                                                                               |
| EPI_ISL_6939819, EPI_ISL_7354124, EPI_ISL_7406048, EPI_ISL_7406049, EPI_ISL_7406082, EPI_ISL_7406083                                                                                                                                                                                                                                                                                                                                                                                                                                                                                                                                                                                                                                                                                                                                                                                                                                                                                                                                                                                                                                                                                                                                                                                                                                                                                                                                                                                                                                                                                                                                                                                                                                                                                                                                                                                                                                                       | National Virus Reference Laboratory                                                                                    | National Virus Reference Laboratory                                                                                                          |                                                                                                                                                                                                                                                                                                                                                                                                                                                                                            | Charlene Bennett; Cillian F De Gascun; Gabriel Gonzalez; Jonathan Dean; Michael Carr; Zoe Yandle                                                                                                                                                                                       |
| EPI_ISL_7116413, EPI_ISL_7116439, EPI_ISL_7116461, EPI_ISL_7116681, EPI_ISL_7116718, EPI_ISL_7116738                                                                                                                                                                                                                                                                                                                                                                                                                                                                                                                                                                                                                                                                                                                                                                                                                                                                                                                                                                                                                                                                                                                                                                                                                                                                                                                                                                                                                                                                                                                                                                                                                                                                                                                                                                                                                                                       | Nebraska Public Health Laboratory                                                                                      | NPHL COVID-19 Response Team                                                                                                                  |                                                                                                                                                                                                                                                                                                                                                                                                                                                                                            | NPHL COVID-19 Response Team                                                                                                                                                                                                                                                            |
| EPI_ISL_7544379, EPI_ISL_7544739                                                                                                                                                                                                                                                                                                                                                                                                                                                                                                                                                                                                                                                                                                                                                                                                                                                                                                                                                                                                                                                                                                                                                                                                                                                                                                                                                                                                                                                                                                                                                                                                                                                                                                                                                                                                                                                                                                                           | New Somerset Hospital wc NSH                                                                                           | NHLS/UCT                                                                                                                                     |                                                                                                                                                                                                                                                                                                                                                                                                                                                                                            | Arash Iranzadeh; Bruna Galvao; Carolyn Williamson; Deelan Doolabh; Diana Hardie; Gert Marais; Innocent Mudau; Luicer Olubayo; Lynn Tyers; Marvin Hsiao; Nokuzola Mbhele; Rageema Joseph; Stephen Korsman                                                                               |
| EPI_ISL_6814922, EPI_ISL_6814923, EPI_ISL_6829575, EPI_ISL_6829577, EPI_ISL_6958955, EPI_ISL_7162071, EPI_ISL_7162072, EPI_ISL_7162073, EPI_ISL_7265843, EPI_ISL_7379517, EPI_ISL_7379527, EPI_ISL_7457536, EPI_ISL_7457537, EPI_ISL_7457538, EPI_ISL_7503742, EPI_ISL_7503743, EPI_ISL_7503744, EPI_ISL_7503745, EPI_ISL_7503746                                                                                                                                                                                                                                                                                                                                                                                                                                                                                                                                                                                                                                                                                                                                                                                                                                                                                                                                                                                                                                                                                                                                                                                                                                                                                                                                                                                                                                                                                                                                                                                                                          | see above                                                                                                              | New South Wales Health Pathology Royal Prince Alfred Hospital                                                                                | Microbiology RPAH                                                                                                                                                                                                                                                                                                                                                                                                                                                                          | Au, J.; Bull, R.; Deveson, I.; Foster, C.; Rawlinson, W.; Ruiz Silva, M.; Van Hal, S.                                                                                                                                                                                                  |
| EPI_ISL_7418387, EPI_ISL_7431953                                                                                                                                                                                                                                                                                                                                                                                                                                                                                                                                                                                                                                                                                                                                                                                                                                                                                                                                                                                                                                                                                                                                                                                                                                                                                                                                                                                                                                                                                                                                                                                                                                                                                                                                                                                                                                                                                                                           | Niedersächsisches Landesgesundheitsamt (NLGA)                                                                          | Robert Koch Institute                                                                                                                        |                                                                                                                                                                                                                                                                                                                                                                                                                                                                                            |                                                                                                                                                                                                                                                                                        |
| EPI_ISL_6958280                                                                                                                                                                                                                                                                                                                                                                                                                                                                                                                                                                                                                                                                                                                                                                                                                                                                                                                                                                                                                                                                                                                                                                                                                                                                                                                                                                                                                                                                                                                                                                                                                                                                                                                                                                                                                                                                                                                                            | North Lantau Hospital                                                                                                  | Hong Kong Department of Health                                                                                                               |                                                                                                                                                                                                                                                                                                                                                                                                                                                                                            | Alan K.L. Tsang; Edman T.K. Lam; Ken H.L. Ng; Peter C.W. Yip; Rickjason C.W. Chan                                                                                                                                                                                                      |
| EPI_ISL_7334887, EPI_ISL_7334888                                                                                                                                                                                                                                                                                                                                                                                                                                                                                                                                                                                                                                                                                                                                                                                                                                                                                                                                                                                                                                                                                                                                                                                                                                                                                                                                                                                                                                                                                                                                                                                                                                                                                                                                                                                                                                                                                                                           | ONEIDA COUNTY HEALTH DEPT.                                                                                             | Wadsworth Center, New York State Department of Health                                                                                        |                                                                                                                                                                                                                                                                                                                                                                                                                                                                                            | Alexis Russell; Catharine Prussing; Daryl M. Lamson; Erasmus Schneider; Erica Lasek-Nesselquist; John Kelly; Jonathan Plitnick; Kirsten St. George; Matthew Shudt; Melissa A Leisner; Navjot Singh                                                                                     |
| EPI_ISL_7495763                                                                                                                                                                                                                                                                                                                                                                                                                                                                                                                                                                                                                                                                                                                                                                                                                                                                                                                                                                                                                                                                                                                                                                                                                                                                                                                                                                                                                                                                                                                                                                                                                                                                                                                                                                                                                                                                                                                                            | Omega Diagnostics at Mounes                                                                                            | Omega Diagnostics at Mounes                                                                                                                  |                                                                                                                                                                                                                                                                                                                                                                                                                                                                                            | Cherish Jackson; Cynthia Corley; Latira Haynes-Jacob; MD; Vivek Khare                                                                                                                                                                                                                  |
| EPI_ISL_7040235                                                                                                                                                                                                                                                                                                                                                                                                                                                                                                                                                                                                                                                                                                                                                                                                                                                                                                                                                                                                                                                                                                                                                                                                                                                                                                                                                                                                                                                                                                                                                                                                                                                                                                                                                                                                                                                                                                                                            | Oslo University Hospital, Department of Medical Microbiology                                                           | Norwegian Institute of Public Health, Department of Virology                                                                                 | Atiya R Ali; Debec Nadia; Engebretsen Serina Beate; Garcia Llorente Ignacio; Hilde Elshaug; Hilde Volla; Jon Bråte; Kamilla Heddeland Instefjord; Karoline Bragstad; Kathrine Stene-Johansen; Line Victoria Moen; Marie Paulsen Madsen; Olav Hungnes; Pedersen Benedikte Nevjen; Rasmus Riis Kopperud                                                                                                                                                                                      |                                                                                                                                                                                                                                                                                        |
| EPI_ISL_7248730, EPI_ISL_7248745, EPI_ISL_7248753, EPI_ISL_7248763, EPI_ISL_7470724, EPI_ISL_7470728                                                                                                                                                                                                                                                                                                                                                                                                                                                                                                                                                                                                                                                                                                                                                                                                                                                                                                                                                                                                                                                                                                                                                                                                                                                                                                                                                                                                                                                                                                                                                                                                                                                                                                                                                                                                                                                       | Oslo University Hospital, Department of Microbiology                                                                   | Norwegian Institute of Public Health, Department of Virology                                                                                 | Arvind Yegambaram Meenakshi Sundaram; Atiya R Ali; Cathrine Fladeby; Debec Nadia; Engebretsen Serina Beate; Garcia Llorente Ignacio; Gregor D. Gilliland; Hilde Elshaug; Hilde Volla; Jon Bråte; Kamilla Heddeland Instefjord; Karoline Bragstad; Kathrine Stene-Johansen; Line Victoria Moen; Lise Andresen; Mariann Nilsen; Marie Paulsen Madsen; Mona Holberg-Petersen; Olav Hungnes; Pedersen Benedikte Nevjen; Pål Marius Bjørnstad; Rasmus Riis Kopperud; Teodora Plamenova Ribarska |                                                                                                                                                                                                                                                                                        |
| EPI_ISL_7470189                                                                                                                                                                                                                                                                                                                                                                                                                                                                                                                                                                                                                                                                                                                                                                                                                                                                                                                                                                                                                                                                                                                                                                                                                                                                                                                                                                                                                                                                                                                                                                                                                                                                                                                                                                                                                                                                                                                                            | Ostfold Hospital Trust - Kalnes, Centre for Laboratory Medicine, Section for gene technology and infection serology    | Norwegian Institute of Public Health, Department of Virology                                                                                 | Atiya R Ali; Debec Nadia; Engebretsen Serina Beate; Garcia Llorente Ignacio; Hilde Elshaug; Hilde Volla; Jon Bråte; Kamilla Heddeland Instefjord; Karoline Bragstad; Kathrine Stene-Johansen; Line Victoria Moen; Marie Paulsen Madsen; Olav Hungnes; Pedersen Benedikte Nevjen; Rasmus Riis Kopperud                                                                                                                                                                                      |                                                                                                                                                                                                                                                                                        |
| EPI_ISL_7467356                                                                                                                                                                                                                                                                                                                                                                                                                                                                                                                                                                                                                                                                                                                                                                                                                                                                                                                                                                                                                                                                                                                                                                                                                                                                                                                                                                                                                                                                                                                                                                                                                                                                                                                                                                                                                                                                                                                                            | PHV-FSS                                                                                                                | PHV-FSS                                                                                                                                      |                                                                                                                                                                                                                                                                                                                                                                                                                                                                                            | Chenwei Wang on behalf of Q-PHIRE Genomics                                                                                                                                                                                                                                             |
| EPI_ISL_6774082, EPI_ISL_6774086, EPI_ISL_6774092                                                                                                                                                                                                                                                                                                                                                                                                                                                                                                                                                                                                                                                                                                                                                                                                                                                                                                                                                                                                                                                                                                                                                                                                                                                                                                                                                                                                                                                                                                                                                                                                                                                                                                                                                                                                                                                                                                          | Palapye Primary Hospital Laboratory                                                                                    | Botswana Harvard HIV Reference Laboratory                                                                                                    | Boitumelo Zuze; Botshelo Radibe; Dorcas Maruapula; Joseph Makheha; Keoratlhe Ntshambiwa; Kgomoiso Moruosi; Legodile Kooepile; Mosepele Mosepele; Mphaphi B. Mbulawa; Ontlametse T. Bareng; Pamela Smith-Lawrence; Roger Shapiro; Sefetogi Ramaolaga; Shahin Lockman; Sikhulile Moyo; Simani Gaseitsiwe; Thongbotho Mphoyakgosi; Wonderful T. Choga                                                                                                                                         |                                                                                                                                                                                                                                                                                        |
| EPI_ISL_7129868, EPI_ISL_7129869                                                                                                                                                                                                                                                                                                                                                                                                                                                                                                                                                                                                                                                                                                                                                                                                                                                                                                                                                                                                                                                                                                                                                                                                                                                                                                                                                                                                                                                                                                                                                                                                                                                                                                                                                                                                                                                                                                                           | Pandemic Response Lab - NYC                                                                                            | Pandemic Response Lab, R&D                                                                                                                   |                                                                                                                                                                                                                                                                                                                                                                                                                                                                                            | Alex Carpio; Cybill del Castillo; Dylan Law; Haiping Hao; Henry Lee; Isabel Fernandez Escapa; Jon Laurent; Melissa Hopkins; Michael Hammerling; Pradeep Bugga; Shinyoung Clair Kang; Sol Rey; William Ward                                                                             |
| EPI_ISL_6842152, EPI_ISL_6842154, EPI_ISL_6842155, EPI_ISL_6842157, EPI_ISL_6842158, EPI_ISL_6842160, EPI_ISL_6842161, EPI_ISL_6842164, EPI_ISL_6842166, EPI_ISL_6842167, EPI_ISL_7452739, EPI_ISL_7452740, EPI_ISL_7452743, EPI_ISL_7452747, EPI_ISL_7452752, EPI_ISL_7452753, EPI_ISL_7452754, EPI_ISL_7452755, EPI_ISL_7452756, EPI_ISL_7452757, EPI_ISL_7452759, EPI_ISL_7452760, EPI_ISL_7452779, EPI_ISL_7452784, EPI_ISL_7452786, EPI_ISL_7452787, EPI_ISL_7452788, EPI_ISL_7452789, EPI_ISL_7452790, EPI_ISL_7452791, EPI_ISL_7452801, EPI_ISL_7452803, EPI_ISL_7452804, EPI_ISL_7456466, EPI_ISL_7456467, EPI_ISL_7456468, EPI_ISL_7456469, EPI_ISL_7456470, EPI_ISL_7456471, EPI_ISL_7456472, EPI_ISL_7456473, EPI_ISL_7456474, EPI_ISL_7456475, EPI_ISL_7456476, EPI_ISL_7456477, EPI_ISL_7456478, EPI_ISL_7456479, EPI_ISL_7456480, EPI_ISL_7456481, EPI_ISL_7456482, EPI_ISL_7456483, EPI_ISL_7456484, EPI_ISL_7456485, EPI_ISL_7456489, EPI_ISL_7456490, EPI_ISL_7456491, EPI_ISL_7456492, EPI_ISL_7456493, EPI_ISL_7456494, EPI_ISL_7456495, EPI_ISL_7456496, EPI_ISL_7456497, EPI_ISL_7456498, EPI_ISL_7456499, EPI_ISL_7456500, EPI_ISL_7456501, EPI_ISL_7456502, EPI_ISL_7456503, EPI_ISL_7456504, EPI_ISL_7456505, EPI_ISL_7456506, EPI_ISL_7456507, EPI_ISL_7456508, EPI_ISL_7456509, EPI_ISL_7456510, EPI_ISL_7456511, EPI_ISL_7456512, EPI_ISL_7456513, EPI_ISL_7456514, EPI_ISL_7456515, EPI_ISL_7456516, EPI_ISL_7456517, EPI_ISL_7456518, EPI_ISL_7456519, EPI_ISL_7456520, EPI_ISL_7456521, EPI_ISL_7456522, EPI_ISL_7456523, EPI_ISL_7456524, EPI_ISL_744906, EPI_ISL_744907, EPI_ISL_744908, EPI_ISL_744909, EPI_ISL_744910, EPI_ISL_744911, EPI_ISL_744912, EPI_ISL_744913, EPI_ISL_744914, EPI_ISL_744915, EPI_ISL_744916, EPI_ISL_744917, EPI_ISL_744918, EPI_ISL_744919, EPI_ISL_744920, EPI_ISL_744921, EPI_ISL_744922, EPI_ISL_744923, EPI_ISL_744924, EPI_ISL_744925, EPI_ISL_7544926, EPI_ISL_7544927, EPI_ISL_7544928 | see above                                                                                                              | PathCare, Cape Town                                                                                                                          | Division of Medical Virology, National Health Laboratory Service (NHLS), Tygerberg Hospital / Stellenbosch University                                                                                                                                                                                                                                                                                                                                                                      | Gert van Zyl; Jean Maritz; Kamela Mahlakwane; Nadine Cronje; Petra Raimond; Shannon Wilson; Tania Stander; Tongai Maponga; Wolfgang Preiser                                                                                                                                            |
| EPI_ISL_7263932, EPI_ISL_7263933                                                                                                                                                                                                                                                                                                                                                                                                                                                                                                                                                                                                                                                                                                                                                                                                                                                                                                                                                                                                                                                                                                                                                                                                                                                                                                                                                                                                                                                                                                                                                                                                                                                                                                                                                                                                                                                                                                                           | Pathogenic Microorganisms Variability Laboratory                                                                       | Pathogenic Microorganisms Variability Laboratory                                                                                             |                                                                                                                                                                                                                                                                                                                                                                                                                                                                                            | Alexander Gintsburg; Alexander Voskoboinikov; Andrei Siniavin; Andrey Pochtovyy; Artem Tkachuk; Denis Logunov; Elena Shidlovskaya; Elizaveta Divisenko; Inna Dolzhikova; Lyudmila Vasilchenko; Nadezhda Kuznetsova; Odintsova Alina; Vladimir Gushchin                                 |
| EPI_ISL_7265083, EPI_ISL_7265084                                                                                                                                                                                                                                                                                                                                                                                                                                                                                                                                                                                                                                                                                                                                                                                                                                                                                                                                                                                                                                                                                                                                                                                                                                                                                                                                                                                                                                                                                                                                                                                                                                                                                                                                                                                                                                                                                                                           | Pathology North - Royal North Shore Hospital - NSW Health Pathology                                                    | NSW Health Pathology - Institute of Clinical Pathology and Medical Research; Westmead Hospital; University of Sydney                         |                                                                                                                                                                                                                                                                                                                                                                                                                                                                                            | Arnott A.; Draper J.; Gall M.; Martinez E.; Rockett R.; Sintchenko V.; on behalf of ICPMR                                                                                                                                                                                              |
| EPI_ISL_6864915, EPI_ISL_6956011, EPI_ISL_6956014                                                                                                                                                                                                                                                                                                                                                                                                                                                                                                                                                                                                                                                                                                                                                                                                                                                                                                                                                                                                                                                                                                                                                                                                                                                                                                                                                                                                                                                                                                                                                                                                                                                                                                                                                                                                                                                                                                          | Pathology West - NSW Health Pathology                                                                                  | NSW Health Pathology - Institute of Clinical Pathology and Medical Research; Westmead Hospital; University of Sydney                         |                                                                                                                                                                                                                                                                                                                                                                                                                                                                                            | Arnott A.; Draper J.; Gall M.; Martinez E.; Rockett R.; Sintchenko V.; on behalf of ICPMR                                                                                                                                                                                              |
| EPI_ISL_7406251, EPI_ISL_7472848, EPI_ISL_7472859, EPI_ISL_7472865                                                                                                                                                                                                                                                                                                                                                                                                                                                                                                                                                                                                                                                                                                                                                                                                                                                                                                                                                                                                                                                                                                                                                                                                                                                                                                                                                                                                                                                                                                                                                                                                                                                                                                                                                                                                                                                                                         | Plateforme de testing Namuroise                                                                                        | Plateforme de testing Namuroise                                                                                                              |                                                                                                                                                                                                                                                                                                                                                                                                                                                                                            | Degosserie Jonathan; Demars Aurore; Denis Olivier; Gilliard Nicolas; Maschietto Céline; Mullier François; Nobis Chloé; Otto Gaetan                                                                                                                                                     |
| EPI_ISL_7173899                                                                                                                                                                                                                                                                                                                                                                                                                                                                                                                                                                                                                                                                                                                                                                                                                                                                                                                                                                                                                                                                                                                                                                                                                                                                                                                                                                                                                                                                                                                                                                                                                                                                                                                                                                                                                                                                                                                                            | Platform BIS UZA/Antwerpen                                                                                             | Labo Klinische Biologie, UZA                                                                                                                 |                                                                                                                                                                                                                                                                                                                                                                                                                                                                                            | Basil Britto Xavier; Christine Lammens; Herman Goossens; Ines Verbesselt; Jasmine Coppens; Kathleen Holemans; Marie Le Mercier; Veerle Matheeußen                                                                                                                                      |

|                                                                                                                                                                                                                                                                                                                                                                                                                                                                                                                                                                                 |                                                                                                          |                                                                                                                                |                                                                                                                                                                                                                                                                                                                                                                                                                                                                                                   |
|---------------------------------------------------------------------------------------------------------------------------------------------------------------------------------------------------------------------------------------------------------------------------------------------------------------------------------------------------------------------------------------------------------------------------------------------------------------------------------------------------------------------------------------------------------------------------------|----------------------------------------------------------------------------------------------------------|--------------------------------------------------------------------------------------------------------------------------------|---------------------------------------------------------------------------------------------------------------------------------------------------------------------------------------------------------------------------------------------------------------------------------------------------------------------------------------------------------------------------------------------------------------------------------------------------------------------------------------------------|
| EPI_ISL_6777160                                                                                                                                                                                                                                                                                                                                                                                                                                                                                                                                                                 | Poliniclinico San Donato                                                                                 | Laboratory of Clinical Microbiology, Virology and Bioemergencies, ASST Fatebenefratelli Sacco - Sacco Hospital                 | Valeria Micheli                                                                                                                                                                                                                                                                                                                                                                                                                                                                                   |
| EPI_ISL_7416687, EPI_ISL_7416708                                                                                                                                                                                                                                                                                                                                                                                                                                                                                                                                                | Procmcure Biotech Germany GmbH                                                                           | Robert Koch Institute                                                                                                          |                                                                                                                                                                                                                                                                                                                                                                                                                                                                                                   |
| EPI_ISL_7507116, EPI_ISL_7507117, EPI_ISL_7507119                                                                                                                                                                                                                                                                                                                                                                                                                                                                                                                               | Public Health Authority of the Slovak Republic                                                           | Public Health Authority of the Slovak Republic                                                                                 | Anna Gičová; Barbora Kotvasová; Elena Tichá; Lucia Ševčíková; Miroslav Böhmer; Pavol Mišenko; Terézia Vrabčová; Tomáš Szemes                                                                                                                                                                                                                                                                                                                                                                      |
| EPI_ISL_7135501, EPI_ISL_7135502, EPI_ISL_7135503, EPI_ISL_7135504, EPI_ISL_7263924, EPI_ISL_7263925, EPI_ISL_7263926, EPI_ISL_7263927, EPI_ISL_7263928, EPI_ISL_7263929, EPI_ISL_7263930, EPI_ISL_7334884, EPI_ISL_7334885, EPI_ISL_7334886, EPI_ISL_7334884, EPI_ISL_7438882, EPI_ISL_7438901, EPI_ISL_7438918, EPI_ISL_7438932, EPI_ISL_7438964, EPI_ISL_7438994, EPI_ISL_7459993, EPI_ISL_7459994, EPI_ISL_7459995, EPI_ISL_7459996, EPI_ISL_7459997, EPI_ISL_7495449, EPI_ISL_7495450, EPI_ISL_7495451, EPI_ISL_7495452, EPI_ISL_7495453, EPI_ISL_7495454, EPI_ISL_7495455 | Public Health Laboratory, Public Health Service Amsterdam, The Netherlands                               | Department of Medical Microbiology & Infection prevention, Amsterdam University Medical Centers location AMC                   | Akke Cornelissen; Fokla Zorgdrager; Janke Schinkel; Jelle Koopsen; Judith den Uil; Marcel Jonges; Matthijs Welkers; Menno de Jong; Robin van Houdt; Sebastien Matamoros; Sjoerd Rebers; Sylvia Bruisten; Tjalling Leenstra and Mariken van der Lubben on behalf of the Amsterdam Regional Genomic epidemiology and Outbreak Surveillance (ARGOS) consortium                                                                                                                                       |
| EPI_ISL_7135499, EPI_ISL_7259732, EPI_ISL_7259741, EPI_ISL_7259744, EPI_ISL_7334879, EPI_ISL_7334880, EPI_ISL_7464493, EPI_ISL_7464494                                                                                                                                                                                                                                                                                                                                                                                                                                          |                                                                                                          |                                                                                                                                |                                                                                                                                                                                                                                                                                                                                                                                                                                                                                                   |
| see above                                                                                                                                                                                                                                                                                                                                                                                                                                                                                                                                                                       | Public Health Ontario Laboratory                                                                         | Public Health Ontario Laboratory                                                                                               | Aimin Li; Alireza Eshaghi; Andre Villegas; Ashleigh Sullivan; Christine Frantz; Dean Maxwell; Esha Joshi; Jared Simpson; Jennifer L Guthrie; Jonathan B Gubbay; Karthikeyan Sivaraman; Lawrence Heisler; Matthew Watson; Michael CY Li; Michael Laszloffy; Nahuel Fittipaldi; Philip Banh; Richard de Borja; Samir N Patel; Sandeep Nagra; Sandra Zittermann; Sarah Teatero; Vanessa G Allen; Yao Chen; Yogi Sundaravadanam                                                                       |
| EPI_ISL_6862005                                                                                                                                                                                                                                                                                                                                                                                                                                                                                                                                                                 | Regional Hospital Liberec                                                                                | Regional Hospital Liberec                                                                                                      | Iva Dolinova; Katerina Arientova; Katerina Stillerova; Martin Kracik; Tomas Zajic                                                                                                                                                                                                                                                                                                                                                                                                                 |
| EPI_ISL_7166216, EPI_ISL_7345201, EPI_ISL_7345221, EPI_ISL_7345322, EPI_ISL_7398995, EPI_ISL_7399058, EPI_ISL_7399073, EPI_ISL_7399078, EPI_ISL_7399512, EPI_ISL_7400550, EPI_ISL_7400551, EPI_ISL_7400555, EPI_ISL_7463952, EPI_ISL_7463953, EPI_ISL_7463956, EPI_ISL_7463961, EPI_ISL_7463968, EPI_ISL_7463969, EPI_ISL_7463972, EPI_ISL_7463975, EPI_ISL_7463979, EPI_ISL_7463997, EPI_ISL_7464020, EPI_ISL_7464030, EPI_ISL_7464048, EPI_ISL_7464049, EPI_ISL_7464059, EPI_ISL_7509826, EPI_ISL_7509828, EPI_ISL_7509830                                                    | Respiratory Virus Unit, Microbiology Services Colindale, Public Health England                           | COVID-19 Genomics UK (COG-UK) Consortium                                                                                       | PHE Covid Sequencing Team                                                                                                                                                                                                                                                                                                                                                                                                                                                                         |
| see above                                                                                                                                                                                                                                                                                                                                                                                                                                                                                                                                                                       |                                                                                                          |                                                                                                                                |                                                                                                                                                                                                                                                                                                                                                                                                                                                                                                   |
| EPI_ISL_7116918                                                                                                                                                                                                                                                                                                                                                                                                                                                                                                                                                                 | Robert Koch-Institut ZBS1 (Zentrum für biologische Gefahren und spezielle Pathogene hochpathogene Viren) | Robert Koch Institute                                                                                                          |                                                                                                                                                                                                                                                                                                                                                                                                                                                                                                   |
| EPI_ISL_7142714, EPI_ISL_7303373, EPI_ISL_7485193, EPI_ISL_7519924, EPI_ISL_7536363                                                                                                                                                                                                                                                                                                                                                                                                                                                                                             | Rosalind Franklin Laboratory                                                                             | Wellcome Sanger Institute for the COVID-19 Genomics UK (COG-UK) Consortium                                                     | Cordelia Langford; David K. Jackson; Dominic Kwiatkowski; Donald Fraser; Ewan Harrison; Ian Johnston; Jeffrey Barrett; John Sillitoe on behalf of the Wellcome Sanger Institute COVID-19 Surveillance Team; Rob Howes; Roberto Amato; Sonia Goncalves; Suki Lee; The Rosalind Franklin Laboratory and Alex Alderton                                                                                                                                                                               |
| EPI_ISL_7366154                                                                                                                                                                                                                                                                                                                                                                                                                                                                                                                                                                 | Rush University Medical Center                                                                           | RIPHL at Rush University Medical Center                                                                                        | Alyse Kittner; Cecilia Chau; Diane Springer; Edith Perez; Felix Araujo Perez; Hannah Barbian; Joyce Houlihan; Kevin Kunstman; Laura Furtado; Marieta Hyde; Mary Hayden; Sofiya Bobrovskaya; Stefan Green                                                                                                                                                                                                                                                                                          |
| EPI_ISL_7545637, EPI_ISL_7545638, EPI_ISL_7545639, EPI_ISL_7545640, EPI_ISL_7545641, EPI_ISL_7545642, EPI_ISL_7545643, EPI_ISL_7545644, EPI_ISL_7545645, EPI_ISL_7545646, EPI_ISL_7545647, EPI_ISL_7545648, EPI_ISL_7545649, EPI_ISL_7545650                                                                                                                                                                                                                                                                                                                                    | see above                                                                                                | SAMRC                                                                                                                          | Arisha Maharaj; Glandhari J; MRC; Naidoo Y; Pillay S; Ramphal U; Ramphal Y; San JE; Tegally H; Tshiabula D; Wilkinson E; de Oliveira T                                                                                                                                                                                                                                                                                                                                                            |
| EPI_ISL_6913953, EPI_ISL_6914908, EPI_ISL_7194610                                                                                                                                                                                                                                                                                                                                                                                                                                                                                                                               | SARS-CoV-2 testing team, National Institute of Infectious Diseases                                       | Pathogen Genomics Center, National Institute of Infectious Diseases                                                            | Hazuka Y Furihata; Kentaro Itokawa; Makoto Kuroda; Masanori Hashino; Masumichi Saito; Naomi Nojiri; Nozomu Hanaoka; Rina Tanaka; Tsuguto Fujimoto; Tsuyoshi Sekizuka                                                                                                                                                                                                                                                                                                                              |
| EPI_ISL_7458718, EPI_ISL_7458719, EPI_ISL_7458720, EPI_ISL_7458721                                                                                                                                                                                                                                                                                                                                                                                                                                                                                                              | SK-Roy Romanow Provincial Laboratory                                                                     | Saskatchewan - Roy Romanow Provincial Laboratory (RRPL)                                                                        | Alanna Senecal; Amanda Lang; Jessica Minion; Kara Loos; Keith MacKenzie; Meredith Faires; Rachel DePaulo; Roy Romanow Provincial Laboratory - Molecular Diagnostics; Ryan McDonald                                                                                                                                                                                                                                                                                                                |
| EPI_ISL_7334889, EPI_ISL_7334890                                                                                                                                                                                                                                                                                                                                                                                                                                                                                                                                                | SUNRISE MEDICAL LABORATORIES                                                                             | Wadsworth Center, New York State Department of Health                                                                          | Alexis Russell; Catharine Prussing; Daryl M. Lamson; Erasmus Schneider; Erica Lasek-Nesselquist; John Kelly; Jonathan Plitnick; Kirsten St. George; Matthew Shudt; Melissa A Leisner; Navjot Singh                                                                                                                                                                                                                                                                                                |
| EPI_ISL_7195727                                                                                                                                                                                                                                                                                                                                                                                                                                                                                                                                                                 | SYNLAB                                                                                                   | GIGA Medical Genomics                                                                                                          | Bouchra Boujemla; Claire Gourzonès; Cécile Meex; Keith Durkin; Laurent Gillet; Maria Artesi; Marie-Pierre Hayette; Nadine Cambisano; Nathalie Renotte; Olivier Ek; Sébastien Bontems; Vincent Bours                                                                                                                                                                                                                                                                                               |
| EPI_ISL_7440440, EPI_ISL_7442466                                                                                                                                                                                                                                                                                                                                                                                                                                                                                                                                                | SYNLAB MVZ Weiden                                                                                        | Robert Koch Institute                                                                                                          |                                                                                                                                                                                                                                                                                                                                                                                                                                                                                                   |
| EPI_ISL_7200823                                                                                                                                                                                                                                                                                                                                                                                                                                                                                                                                                                 | Salzkammergutklinikum Vöcklabruck, Institut für Pathologie                                               | Salzkammergutklinikum Vöcklabruck, Institut für Pathologie                                                                     | Franz Pühringer; Penka Lechner; Regina Stitz; René Silye; Senka Rohregger                                                                                                                                                                                                                                                                                                                                                                                                                         |
| EPI_ISL_7015235                                                                                                                                                                                                                                                                                                                                                                                                                                                                                                                                                                 | Selangor State Health Department                                                                         | Institute for Medical Research, Infectious Disease Research Centre, National Institutes of Health, Ministry of Health Malaysia | Ahmad FA; Ahmad Fazilah NA; Anasir MI; Azizan MA; Kamel K; Mohamad Sukri MZ; Mohd Zawawi Z; Norhisham SN; Ramly N; Robert F; Rosli NR; Suppiah J; Thayan R                                                                                                                                                                                                                                                                                                                                        |
| EPI_ISL_7467969                                                                                                                                                                                                                                                                                                                                                                                                                                                                                                                                                                 | Servicio Virosis Respiratorias- Departamento Virologia-INEI                                              | Instituto Nacional Enfermedades Infecciosas C.G.Malbran                                                                        | Avaro M.; Baumeister E.; Benedetti E.; Campos J.; Cisterna D.; Dattero ME; De Belder D.; Haim MS.; Lorenzo F.; Molina V.; Perandones C.; Poklepovich T.; Pontoriero A.; Russo M.; Sanchez Loria J.; Tuduri E.                                                                                                                                                                                                                                                                                     |
| EPI_ISL_6795212, EPI_ISL_6825365, EPI_ISL_7056045, EPI_ISL_7056614                                                                                                                                                                                                                                                                                                                                                                                                                                                                                                              | Shamir Medical Center (Asaf Harofe)                                                                      | Shamir Medical Center (Asaf Harofe)                                                                                            | Abu Hamad Ramzia; Adina Bar Chaim; Alona Frenkel; Anna Vishnevsky; Chen Weiner; Nir Rainy; Patricia Benveniste-Lekovitz; Reut Sorek Abramovich; Yevgeni Yegorov                                                                                                                                                                                                                                                                                                                                   |
| EPI_ISL_7062525, EPI_ISL_7405371                                                                                                                                                                                                                                                                                                                                                                                                                                                                                                                                                | Spital Riggsberg                                                                                         | Institute for Infectious Diseases, University of Bern                                                                          | Alban Ramette; Christian Baumann; Cora Sägesser; Franziska Suter-Riniker; Loïc Bocard; Miguel A Terrazos Miani; Nicole Liechti; Pascal Bittel; Peter Keller; Sonja Gempeler; Stefan Neuenschwander; Stephen L Leib                                                                                                                                                                                                                                                                                |
| EPI_ISL_6963509                                                                                                                                                                                                                                                                                                                                                                                                                                                                                                                                                                 | Sri Jayadeva Institute of Cardiovascular Sciences and Research / Strand Life Sciences                    | National Centre for Biological Sciences, TIFR - Rockefeller Foundation                                                         | Aarati Karaba; Anson Kunjumon George; Aparnaa Ramanathan; Apurva Sarin; Chandrasekhar Vadiamudi; Chitra Pattabiraman; Darshan Sreenivas; Dasaradhi Palakodeti; Dimple Notani; Divya Priya A; Madhusudhan J; Manisha Bharadwaj; Manoj Kumar Jha; Mudasir Nazaar; Pradeep B P; Priyanka Ananta Muly; Ramesh Hariharan; Rohan Pais; Satyajit Mayor; Samritra Mardikar; Srivatshan Adimoolam; Uma Ramakrishnan; Vamsi Veeramachaneni; Vasanthapuram Ravi; Vijay Chandru; Vishal G Rao; Yasodha Kannan |
| EPI_ISL_7265233                                                                                                                                                                                                                                                                                                                                                                                                                                                                                                                                                                 | St Vincent's Pathology (SydPath)                                                                         | NSW Health Pathology - Institute of Clinical Pathology and Medical Research; Westmead Hospital; University of Sydney           | Arnott A.; Draper J.; Gall M.; Martinez E.; Rockett R.; Sintchenko V.; on behalf of ICPMR                                                                                                                                                                                                                                                                                                                                                                                                         |
| EPI_ISL_7170972                                                                                                                                                                                                                                                                                                                                                                                                                                                                                                                                                                 | Stadspital Triemli                                                                                       | Institute of Medical Virology                                                                                                  | Alexandra Trkola; Annette Audigé; Cyril Shah; Gabriela Ziltener; Guido Bloemberg; Jon Huder; Jürg Böni; Kevin Steiner; Maria Grünberg; Maryam Zaheri; Michael Huber; Riccarda Capaul; Stefan Schmutz; Verena Kufner                                                                                                                                                                                                                                                                               |
| EPI_ISL_6971472                                                                                                                                                                                                                                                                                                                                                                                                                                                                                                                                                                 | Stadspital Triemli                                                                                       | Institute of Medical Virology, University of Zurich                                                                            | Alexandra Trkola; Annette Audigé; Cyril Shah; Gabriela Ziltener; Guido Bloemberg; Jon Huder; Jürg Böni; Kevin Steiner; Maria Grünberg; Maryam Zaheri; Michael Huber; Riccarda Capaul; Stefan Schmutz; Verena Kufner                                                                                                                                                                                                                                                                               |
| EPI_ISL_7445855                                                                                                                                                                                                                                                                                                                                                                                                                                                                                                                                                                 | State Hygienic Laboratory at the University of Iowa                                                      | State Hygienic Laboratory at the University of Iowa                                                                            | Alankar Kampooale; Anna Yakos; Cindy Toll; Davis Rieckenberg; Erik Twaite; Jeff Benfer; Kris Eveland; Krishnaveni Sompallae; Kristen Zanon; Mariah Knutson; Mohammed Allam; Valerie Reeb; Wes Hottel                                                                                                                                                                                                                                                                                              |
| EPI_ISL_7013425, EPI_ISL_7264087, EPI_ISL_7264088, EPI_ISL_7456351, EPI_ISL_7456393, EPI_ISL_7456394, EPI_ISL_7456395, EPI_ISL_7456396, EPI_ISL_7456397, EPI_ISL_7456398, EPI_ISL_7456399, EPI_ISL_7456400                                                                                                                                                                                                                                                                                                                                                                      | see above                                                                                                | State Laboratories Division, Hawaii State Department of Health                                                                 | Ayana Garnet; Daniel Strange; Drew Kuwazaki; Edward Desmond; Pamela O'Brien; Razvan Sultana                                                                                                                                                                                                                                                                                                                                                                                                       |
| EPI_ISL_7544013, EPI_ISL_7544494, EPI_ISL_7544584, EPI_ISL_7544730                                                                                                                                                                                                                                                                                                                                                                                                                                                                                                              | Study: Rapid Diag POC Covid                                                                              | NHLs/UCT                                                                                                                       | Arash Iranzadeh; Bruna Galvao; Carolyn Williamson; Deelan Doolabh; Diana Hardie; Gert Marais; Innocent Mudau; Luicer Olubayo; Lynn Tyers; Marvin Hsiao; Nokuzola Mbhele; Rageema Joseph; Stephen Korsman                                                                                                                                                                                                                                                                                          |
| EPI_ISL_7364700, EPI_ISL_7364701, EPI_ISL_7364702                                                                                                                                                                                                                                                                                                                                                                                                                                                                                                                               | Summit Clinical Laboratories                                                                             | City of Milwaukee Health Department Laboratory                                                                                 | Amy Bauer; Manjeet Khubbar; Samantha Scott; Sanjib Bhattacharyya                                                                                                                                                                                                                                                                                                                                                                                                                                  |
| EPI_ISL_6883250, EPI_ISL_7452246, EPI_ISL_7452247                                                                                                                                                                                                                                                                                                                                                                                                                                                                                                                               | Swedish national genomic surveillance program of SARS-CoV-2                                              | The Public Health Agency of Sweden                                                                                             | Alma Brolund; Maria Lind Karlberg; Maximilian Riess; Swedish national genomic surveillance program of SARS-CoV-2                                                                                                                                                                                                                                                                                                                                                                                  |
| EPI_ISL_7457427, EPI_ISL_7457428, EPI_ISL_7457429, EPI_ISL_7457430, EPI_ISL_7457431                                                                                                                                                                                                                                                                                                                                                                                                                                                                                             | Synlab Medilab                                                                                           | Karolinska University Hospital Huddinge                                                                                        | Annika Tiveljung Lindell; Henning Onsbring; Jan Albert; Karina Hentrich; Lynda Eneh; Martin Ekman; Natalija Gerasimcik; Robert Dyrdak; Sandra Broddesson; Shambhu Ganeshappa Aralaguppe; Tanja Normark; Tobias Allander; Valtteri Wirta; Zhibing Yun                                                                                                                                                                                                                                              |

|                                                                                                                                                                                                                                                                                                                                                                                                                                                                                                                                                                                                                                                                                                                                                                                                                                                                                                                                                                                                                                                                                                               |                                                                                                                         |                                                                                                                                                                                                                                                                                                                                                                                                                                                                                                    |                                                                                                                                                                                                                                                                                                                                                                                                                                                    |
|---------------------------------------------------------------------------------------------------------------------------------------------------------------------------------------------------------------------------------------------------------------------------------------------------------------------------------------------------------------------------------------------------------------------------------------------------------------------------------------------------------------------------------------------------------------------------------------------------------------------------------------------------------------------------------------------------------------------------------------------------------------------------------------------------------------------------------------------------------------------------------------------------------------------------------------------------------------------------------------------------------------------------------------------------------------------------------------------------------------|-------------------------------------------------------------------------------------------------------------------------|----------------------------------------------------------------------------------------------------------------------------------------------------------------------------------------------------------------------------------------------------------------------------------------------------------------------------------------------------------------------------------------------------------------------------------------------------------------------------------------------------|----------------------------------------------------------------------------------------------------------------------------------------------------------------------------------------------------------------------------------------------------------------------------------------------------------------------------------------------------------------------------------------------------------------------------------------------------|
| EPI_ISL_7456440                                                                                                                                                                                                                                                                                                                                                                                                                                                                                                                                                                                                                                                                                                                                                                                                                                                                                                                                                                                                                                                                                               | Tambo Memorial Laboratory                                                                                               | National Institute for Communicable Diseases of the National Health Laboratory Service                                                                                                                                                                                                                                                                                                                                                                                                             | Amoako DG; Bhiman JN; Everatt J; Ismail A; Mahlangu B; Mnguni A; Mohale T; Ntuli N; Scheepers C; Wolter N                                                                                                                                                                                                                                                                                                                                          |
| EPI_ISL_6825551                                                                                                                                                                                                                                                                                                                                                                                                                                                                                                                                                                                                                                                                                                                                                                                                                                                                                                                                                                                                                                                                                               | Territory Pathology                                                                                                     | Territory Pathology                                                                                                                                                                                                                                                                                                                                                                                                                                                                                | Dimitrios Menouhos; Ella Meumann; Robert Baird                                                                                                                                                                                                                                                                                                                                                                                                     |
| EPI_ISL_7171744                                                                                                                                                                                                                                                                                                                                                                                                                                                                                                                                                                                                                                                                                                                                                                                                                                                                                                                                                                                                                                                                                               | The Hope Clinic of Emory Vaccine Center, Emory University                                                               | Piantadosi Lab, Emory Department of Pathology                                                                                                                                                                                                                                                                                                                                                                                                                                                      | Anne Piantadosi; Azmain Taz; Dara Khosravi; Ethan Wang; Jesse Waggoner; Ludy Carmola; Marybeth Sexton; Nadine Rouphael                                                                                                                                                                                                                                                                                                                             |
| EPI_ISL_7446810                                                                                                                                                                                                                                                                                                                                                                                                                                                                                                                                                                                                                                                                                                                                                                                                                                                                                                                                                                                                                                                                                               | Thüringer Landesamtes für Verbraucherschutz                                                                             | Robert Koch Institute                                                                                                                                                                                                                                                                                                                                                                                                                                                                              |                                                                                                                                                                                                                                                                                                                                                                                                                                                    |
| EPI_ISL_7235629                                                                                                                                                                                                                                                                                                                                                                                                                                                                                                                                                                                                                                                                                                                                                                                                                                                                                                                                                                                                                                                                                               | Tulane University School of Medicine                                                                                    | Tulane University School of Medicine                                                                                                                                                                                                                                                                                                                                                                                                                                                               | Di Tian                                                                                                                                                                                                                                                                                                                                                                                                                                            |
| EPI_ISL_7505962                                                                                                                                                                                                                                                                                                                                                                                                                                                                                                                                                                                                                                                                                                                                                                                                                                                                                                                                                                                                                                                                                               | UC Davis Genome Center                                                                                                  | UC Davis Genome Center                                                                                                                                                                                                                                                                                                                                                                                                                                                                             | Healthy Davis Together; UC Davis                                                                                                                                                                                                                                                                                                                                                                                                                   |
| EPI_ISL_7451261                                                                                                                                                                                                                                                                                                                                                                                                                                                                                                                                                                                                                                                                                                                                                                                                                                                                                                                                                                                                                                                                                               | UNILABS                                                                                                                 | Instituto Nacional de Saude (INSA)                                                                                                                                                                                                                                                                                                                                                                                                                                                                 | Borges et al                                                                                                                                                                                                                                                                                                                                                                                                                                       |
| EPI_ISL_7160037, EPI_ISL_7160038, EPI_ISL_7160039, EPI_ISL_7545421, EPI_ISL_7545422, EPI_ISL_7545423, EPI_ISL_7545424                                                                                                                                                                                                                                                                                                                                                                                                                                                                                                                                                                                                                                                                                                                                                                                                                                                                                                                                                                                         | see above                                                                                                               | UW Virology Lab                                                                                                                                                                                                                                                                                                                                                                                                                                                                                    | Alexander Greninger; Hong Xie; Isabel Arnould; Keith R Jerome; Meei-Li Huang; Nathan Breit; Patrick Mathias; Pavitra Roychoudhury; Pooneh Hajian; Ricardo Perez; Robert J. Livingston; Saraswathi Sathees; Sean Ellis; Seffir T. Wendm; Shah Mohamed Bakhsh; Tien V. Nguyen                                                                                                                                                                        |
| EPI_ISL_7544861                                                                                                                                                                                                                                                                                                                                                                                                                                                                                                                                                                                                                                                                                                                                                                                                                                                                                                                                                                                                                                                                                               | Unilabs                                                                                                                 | Institute of Medical Virology, University of Zurich                                                                                                                                                                                                                                                                                                                                                                                                                                                | Alexandra Trkola; Annette Audigé; Cyril Shah; Gabriela Ziltener; Guido Bloemberg; Jon Huder; Jürg Böni; Kevin Steiner; Maria Grünberg; Maryam Zaheri; Michael Huber; Riccarda Capaul; Stefan Schmutz; Verena Kufner                                                                                                                                                                                                                                |
| EPI_ISL_7470330, EPI_ISL_7470341                                                                                                                                                                                                                                                                                                                                                                                                                                                                                                                                                                                                                                                                                                                                                                                                                                                                                                                                                                                                                                                                              | Unilabs Laboratory Medicine                                                                                             | Norwegian Institute of Public Health, Department of Virology                                                                                                                                                                                                                                                                                                                                                                                                                                       | Atiya R Ali; Debeck Nadia; Engebretsen Serina Beate; Garcia Llorente Ignacio; Hilde Elshaug; Hilde Vollen; Jon Bråte; Kamilla Heddeland Instefjord; Karoline Bragstad; Kathrine Stene-Johansen; Line Victoria Moen; Marie Paulsen Madsen; Olav Hungnes; Pedersen Benedikte Nevjen; Rasmus Riis Kopperud                                                                                                                                            |
| EPI_ISL_7141056                                                                                                                                                                                                                                                                                                                                                                                                                                                                                                                                                                                                                                                                                                                                                                                                                                                                                                                                                                                                                                                                                               | Unipath Speciality Laboratory Limited, Ahmedabad                                                                        | Gujarat Biotechnology Research Centre                                                                                                                                                                                                                                                                                                                                                                                                                                                              | Apurvashin Puvur; Bhadreshsinh Gohil; Chaitanya Joshi; Dinesh Kumar; Janvi Raval; Jwalant Shah; Madhvi Joshi; Nimesh Patel; Nitin Savaliya; Nitin Shukla; Priyank Chavda; Ramesh Pandit; Sonal Sharma; Zarna Patel                                                                                                                                                                                                                                 |
| EPI_ISL_7542255                                                                                                                                                                                                                                                                                                                                                                                                                                                                                                                                                                                                                                                                                                                                                                                                                                                                                                                                                                                                                                                                                               | University Medical Center Hamburg Eppendorf                                                                             | Heinrich Pette Institute, Leibniz Institute for Experimental Virology                                                                                                                                                                                                                                                                                                                                                                                                                              | Adam Grundhoff; Alexis Robitaille; Johannes Knobloch; Martin Aepfelbacher; Nicole Fischer; Thomas Günther                                                                                                                                                                                                                                                                                                                                          |
| EPI_ISL_6929785, EPI_ISL_7195724, EPI_ISL_7195725, EPI_ISL_7195726, EPI_ISL_7405404, EPI_ISL_7405405, EPI_ISL_7405406, EPI_ISL_7405407, EPI_ISL_7405408, EPI_ISL_7405409, EPI_ISL_7405412, EPI_ISL_7462253, EPI_ISL_7462258, EPI_ISL_7462265, EPI_ISL_7462271                                                                                                                                                                                                                                                                                                                                                                                                                                                                                                                                                                                                                                                                                                                                                                                                                                                 | see above                                                                                                               | GIGA Medical Genomics                                                                                                                                                                                                                                                                                                                                                                                                                                                                              | Bouchra Boujemla; Claire Gourzonès; Cécile Meex; Keith Durkin; Laurent Gillet; Maria Artesi; Marie-Pierre Hayette; Nadine Cambisano; Nathalie Renotte; Olivier Ek; Sébastien Bontems; Vincent Bours                                                                                                                                                                                                                                                |
| EPI_ISL_7379462                                                                                                                                                                                                                                                                                                                                                                                                                                                                                                                                                                                                                                                                                                                                                                                                                                                                                                                                                                                                                                                                                               | University of Wisconsin-Madison AIDS Vaccine Research Laboratories                                                      | University of Wisconsin-Madison AIDS Vaccine Research Laboratories                                                                                                                                                                                                                                                                                                                                                                                                                                 | Gage Moreno; Katarina Braun; et al. AIDS Vaccine Research Laboratories                                                                                                                                                                                                                                                                                                                                                                             |
| EPI_ISL_7544862, EPI_ISL_7544872                                                                                                                                                                                                                                                                                                                                                                                                                                                                                                                                                                                                                                                                                                                                                                                                                                                                                                                                                                                                                                                                              | UniversitätsSpital Zürich                                                                                               | Institute of Medical Virology, University of Zurich                                                                                                                                                                                                                                                                                                                                                                                                                                                | Alexandra Trkola; Annette Audigé; Cyril Shah; Gabriela Ziltener; Guido Bloemberg; Jon Huder; Jürg Böni; Kevin Steiner; Maria Grünberg; Maryam Zaheri; Michael Huber; Riccarda Capaul; Stefan Schmutz; Verena Kufner                                                                                                                                                                                                                                |
| EPI_ISL_7418452, EPI_ISL_7418453, EPI_ISL_7418454, EPI_ISL_7418455, EPI_ISL_7418456, EPI_ISL_7418463, EPI_ISL_7418464, EPI_ISL_7418465                                                                                                                                                                                                                                                                                                                                                                                                                                                                                                                                                                                                                                                                                                                                                                                                                                                                                                                                                                        | see above                                                                                                               | Robert Koch Institute                                                                                                                                                                                                                                                                                                                                                                                                                                                                              |                                                                                                                                                                                                                                                                                                                                                                                                                                                    |
| EPI_ISL_7136300, EPI_ISL_7136771, EPI_ISL_7336152, EPI_ISL_7503247                                                                                                                                                                                                                                                                                                                                                                                                                                                                                                                                                                                                                                                                                                                                                                                                                                                                                                                                                                                                                                            | Utah Public Health Laboratory                                                                                           | Utah Public Health Laboratory                                                                                                                                                                                                                                                                                                                                                                                                                                                                      | Erin L. Young; John Arnn; Kelly F. Oakeson; Olinto Linares-Perdomo; Pooja Gupta; Tom Iverson                                                                                                                                                                                                                                                                                                                                                       |
| EPI_ISL_7261603                                                                                                                                                                                                                                                                                                                                                                                                                                                                                                                                                                                                                                                                                                                                                                                                                                                                                                                                                                                                                                                                                               | VA Tampa Healthcare System                                                                                              | VHA Public Health Reference Laboratory                                                                                                                                                                                                                                                                                                                                                                                                                                                             | Mark Holodniy on behalf of VA SEQFORCE; US Department of Veterans Affairs                                                                                                                                                                                                                                                                                                                                                                          |
| EPI_ISL_6989662                                                                                                                                                                                                                                                                                                                                                                                                                                                                                                                                                                                                                                                                                                                                                                                                                                                                                                                                                                                                                                                                                               | Vault Health                                                                                                            | Minnesota Department of Health, Public Health Laboratory                                                                                                                                                                                                                                                                                                                                                                                                                                           | Alyssa Mondelli; Elizabeth Horn; Jacob Garfin; Kelly Pung; Matt Plumb; Sarah Namugenyi; and Xiong Wang                                                                                                                                                                                                                                                                                                                                             |
| EPI_ISL_7398681, EPI_ISL_7398758                                                                                                                                                                                                                                                                                                                                                                                                                                                                                                                                                                                                                                                                                                                                                                                                                                                                                                                                                                                                                                                                              | Vichaivej International Hospital Nongkhaem                                                                              | National Institute of Health, Department of Medical Sciences, Ministry of Public Health, Thailand                                                                                                                                                                                                                                                                                                                                                                                                  | Archawin Rojanawiwat; Ballang Uppapong; Beth Skaggs; Donlaya Maunplueg; Kazuhisa Okada; Natchaya Khadsang; Nuttida Thongpramul; Pakorn Piromtong; Pilailuk Akkapaiboon Okada; Piroon Jenjaroenpun; Pongpun Sawatwong; Prapat Suriyaphol; Sirikanda Wimol; Siripaporn Phuygun; Sittiporn Parmnen; Supakit Sirilak; Suratchana Mitrat; Thanutsapa Thanadachakul; Thidathip Wongsurawat                                                               |
| EPI_ISL_7224567, EPI_ISL_7224577                                                                                                                                                                                                                                                                                                                                                                                                                                                                                                                                                                                                                                                                                                                                                                                                                                                                                                                                                                                                                                                                              | Viollier AG                                                                                                             | Clinical Bacteriology, University Hospital Basel                                                                                                                                                                                                                                                                                                                                                                                                                                                   | Adrian Egli; Alfredo Mari; Christiane Beckmann; Fanny Wegner; Hans Hirsch; Helena MB Seth-Smith; Julia Bielecki; Karoline Leuzinger; Manuel Battagay; Tim Roloff                                                                                                                                                                                                                                                                                   |
| EPI_ISL_7371749, EPI_ISL_7371751, EPI_ISL_7372207                                                                                                                                                                                                                                                                                                                                                                                                                                                                                                                                                                                                                                                                                                                                                                                                                                                                                                                                                                                                                                                             | Viollier AG                                                                                                             | Department of Biosystems Science and Engineering, ETH Zürich                                                                                                                                                                                                                                                                                                                                                                                                                                       | Andrea Patrignani; Andrea Cabral de Gouveia; Catharine Aquino; Chaoran Chen; Christiane Beckmann; Christoph Noppen; Daniel Ehrsam; Doris Popovic; Griffin White; Isabel Stürmer; Ivan Topolsky; Jay Tracy; Kim Philipp Jablonski; Lara Fuhrmann; Laura Neff; Lennart Opitz; Louis du Plessis; Maria Domenica Moccia; Maurice Redondo; Niko Beerenwinkel; Olivier Kobel; Ralph Schlapbach; Sarah Nadeau; Simon Grüter; Tanja Stadler; Timothy Sykes |
| EPI_ISL_7509012, EPI_ISL_7509019, EPI_ISL_7509025, EPI_ISL_7509030                                                                                                                                                                                                                                                                                                                                                                                                                                                                                                                                                                                                                                                                                                                                                                                                                                                                                                                                                                                                                                            | Virology Department, Royal Infirmary of Edinburgh, NHS Lothian / School of Biological Sciences, University of Edinburgh | COVID-19 Genomics UK (COG-UK) Consortium                                                                                                                                                                                                                                                                                                                                                                                                                                                           | Colquhoun R; Cotton S; Dewar R; Fernandez G; Gallagher A; Hill V; Jackson B; Maloney D; McCrone JT; McHugh M; O'Toole A; Rambaut A; Scher E; Templeton K; Yu X                                                                                                                                                                                                                                                                                     |
| EPI_ISL_7285844, EPI_ISL_7285845, EPI_ISL_7285846, EPI_ISL_7285847, EPI_ISL_7285848                                                                                                                                                                                                                                                                                                                                                                                                                                                                                                                                                                                                                                                                                                                                                                                                                                                                                                                                                                                                                           | Virology Laboratory, Scientific Department, Army Medical Center                                                         | Virology Laboratory, Scientific Department, Army Medical Center                                                                                                                                                                                                                                                                                                                                                                                                                                    | Anella Monte; Anna Anselmo; Antonella Fortunato; Filippo Molinari; Florigio Lista; Francesco Giordani; Giancarlo Petralito; Giandomenico Cerreto; Giulia Campoli; Lucia Nicosia; Marzia Cavalli; Pietro Marco D'Angelo; Riccardo De Sanctis; Rossella Brandi; Silvia Fillo; Vanessa Vera Fain                                                                                                                                                      |
| EPI_ISL_7503508, EPI_ISL_7503509                                                                                                                                                                                                                                                                                                                                                                                                                                                                                                                                                                                                                                                                                                                                                                                                                                                                                                                                                                                                                                                                              | Washington State Department of Health Public Health Laboratories                                                        | Washington State Department of Health Public Health Laboratories                                                                                                                                                                                                                                                                                                                                                                                                                                   | Alex Latham; Ardizon Valdez; Avi Singh; Claire Howell; Denny Russell; Drew MacKellar; Holly Halstead; JohnAric Peterson; Kathryn Sickles; Kristin Roche; Lisa Jones; Philip Dykema; Rebecca Cao                                                                                                                                                                                                                                                    |
| EPI_ISL_7548944, EPI_ISL_7548945                                                                                                                                                                                                                                                                                                                                                                                                                                                                                                                                                                                                                                                                                                                                                                                                                                                                                                                                                                                                                                                                              | Wexner Medical Center                                                                                                   | OSU College of Medicine                                                                                                                                                                                                                                                                                                                                                                                                                                                                            | Corcoran, S.; Koenig, S.                                                                                                                                                                                                                                                                                                                                                                                                                           |
| EPI_ISL_7501188                                                                                                                                                                                                                                                                                                                                                                                                                                                                                                                                                                                                                                                                                                                                                                                                                                                                                                                                                                                                                                                                                               | Winchester Hospital via Lahey Hospital                                                                                  | New England Biolabs                                                                                                                                                                                                                                                                                                                                                                                                                                                                                | Abel, G.; B.W.; C.J.; Colgrove, R.; Duncan, R.; Elfahal, M.; Flynn; Heim, K.; Karolides, M.; L. and Langhorst; Michaels, L.; Pinet, K.; Skelton, T.; Sun                                                                                                                                                                                                                                                                                           |
| EPI_ISL_7263803                                                                                                                                                                                                                                                                                                                                                                                                                                                                                                                                                                                                                                                                                                                                                                                                                                                                                                                                                                                                                                                                                               | Wisconsin State Laboratory of Hygiene Communicable Disease Division                                                     | Wisconsin State Laboratory of Hygiene Communicable Disease Division                                                                                                                                                                                                                                                                                                                                                                                                                                | Abigail C. Shockey; Alicia J. Mooney; Erika M. Hanson; Kelsey R. Florek; Richard Griesser; Sara Wagner; Tonya Danz                                                                                                                                                                                                                                                                                                                                 |
| EPI_ISL_7478524, EPI_ISL_7478525, EPI_ISL_7478526, EPI_ISL_7478527, EPI_ISL_7478529, EPI_ISL_7478530, EPI_ISL_7502154, EPI_ISL_7502155                                                                                                                                                                                                                                                                                                                                                                                                                                                                                                                                                                                                                                                                                                                                                                                                                                                                                                                                                                        | see above                                                                                                               | Yale Clinical Virology Lab                                                                                                                                                                                                                                                                                                                                                                                                                                                                         | Anderson Brito; Chaney Kalinich; Chantal Vogels; Isabel Ott; Joseph Fauver; Kendall Billig; Mallery Breban; Marie L. Landry; Mary Petrone; Nathan Grubaugh; Tobias Koch                                                                                                                                                                                                                                                                            |
| EPI_ISL_7472293                                                                                                                                                                                                                                                                                                                                                                                                                                                                                                                                                                                                                                                                                                                                                                                                                                                                                                                                                                                                                                                                                               | Yale Pathology Labs                                                                                                     | Yale Pathology Labs                                                                                                                                                                                                                                                                                                                                                                                                                                                                                | Angelique Levi; Brian Daley; Chen Liu; Guangxiao Yang; Heidi Herrick; Jianhui Wang; Jinglan Wang; John Sinaré; Katherine Fajardo; Kevin Schofield; Laura Brady; Michael Stankewich; Minghao Zhong; Monica Talmor; Pei Hui; Peter Gershkovich; Richard Bouffard; Stephanie Weirsmann; Susan Bell; Sylvia White                                                                                                                                      |
| EPI_ISL_6795833, EPI_ISL_6795835, EPI_ISL_6795836, EPI_ISL_6795837, EPI_ISL_6795838, EPI_ISL_6795839, EPI_ISL_6795840, EPI_ISL_6795841, EPI_ISL_6795842, EPI_ISL_6795844, EPI_ISL_6795845, EPI_ISL_6795846, EPI_ISL_6795847, EPI_ISL_6795848, EPI_ISL_6795849, EPI_ISL_6795850, EPI_ISL_6825389, EPI_ISL_6825390, EPI_ISL_6825391, EPI_ISL_6825392, EPI_ISL_6825393, EPI_ISL_6825394, EPI_ISL_6825395, EPI_ISL_6825396, EPI_ISL_6825397, EPI_ISL_6825398, EPI_ISL_7015172, EPI_ISL_7015173, EPI_ISL_7015174, EPI_ISL_7015175, EPI_ISL_7015176, EPI_ISL_7015177, EPI_ISL_7015178, EPI_ISL_7015179, EPI_ISL_7015180, EPI_ISL_7015181, EPI_ISL_7015182, EPI_ISL_7015183, EPI_ISL_7015184, EPI_ISL_7015185, EPI_ISL_7015186, EPI_ISL_7015187, EPI_ISL_7015188, EPI_ISL_7015189, EPI_ISL_7015190, EPI_ISL_7015191, EPI_ISL_7015192, EPI_ISL_7015193, EPI_ISL_7015194, EPI_ISL_7015195, EPI_ISL_7015196, EPI_ISL_7015197, EPI_ISL_7015198, EPI_ISL_7015199, EPI_ISL_7015200, EPI_ISL_7015201, EPI_ISL_7015202, EPI_ISL_7015203, EPI_ISL_7015204, EPI_ISL_7015205, EPI_ISL_7015206, EPI_ISL_7015207, EPI_ISL_7015208 | see above                                                                                                               | Adriano Mendes; Amoaka D; Amy Strydom; Arisha Maharaj; Bester P; Bhiman J; Engelbrecht S; Everatt J; Giandhari J; Goedhals D; Hardie D; Hsiao M; Iranzadeh A; Lessells R; Makatini Z; Maponga T; Mdlalose N; Micheala Davids; Mlisana K; Moir M; NGS-SA (Scheepers C; Naidoo Y; Nyaga M) Giandhari J; Oluwakemi M; Pillay S; Preiser W; Ramphal U; Ramphal Y; San JE; Sim Mayaphi and Marietjie Venter; Tegally H; Tshiabula D; Venter M; Wilkinson E; Williamson C; de Oliveira T; von Gottberg A |                                                                                                                                                                                                                                                                                                                                                                                                                                                    |
| EPI_ISL_7548959, EPI_ISL_7548966, EPI_ISL_7549083                                                                                                                                                                                                                                                                                                                                                                                                                                                                                                                                                                                                                                                                                                                                                                                                                                                                                                                                                                                                                                                             | ZOTZ KLIMAS MVZ Düsseldorf-Centrum GbR ÜBAG für Labormedizin, Genetik, Zytologie, Pathologie                            | Center of Medical Microbiology, Virology, and Hospital Hygiene, University of Duesseldorf                                                                                                                                                                                                                                                                                                                                                                                                          | Alexander Dilthey; Andreas Walker; Daniel Strelow; Jessica Nicolai; Jörg Timm; Katrin Hoffmann; Klaus Pfeffer; Lisanna Hülse; Malte Kohns Vasconcelos; Maximilian Damagnez; Nadine Lübke; Patrick Finzer; Rainer Zotz; Tobias Wienemann; Torsten Houwaart                                                                                                                                                                                          |
| EPI_ISL_7544865                                                                                                                                                                                                                                                                                                                                                                                                                                                                                                                                                                                                                                                                                                                                                                                                                                                                                                                                                                                                                                                                                               | Zentrallabor Zürich                                                                                                     | Institute of Medical Virology, University of Zurich                                                                                                                                                                                                                                                                                                                                                                                                                                                | Alexandra Trkola; Annette Audigé; Cyril Shah; Gabriela Ziltener; Guido Bloemberg; Jon Huder; Jürg Böni; Kevin Steiner; Maria Grünberg; Maryam Zaheri; Michael Huber; Riccarda Capaul; Stefan Schmutz; Verena Kufner                                                                                                                                                                                                                                |
| EPI_ISL_7423603                                                                                                                                                                                                                                                                                                                                                                                                                                                                                                                                                                                                                                                                                                                                                                                                                                                                                                                                                                                                                                                                                               | amedes MVZ für Laboratoriumsdiagnostik Raubling GmbH                                                                    | Robert Koch Institute                                                                                                                                                                                                                                                                                                                                                                                                                                                                              |                                                                                                                                                                                                                                                                                                                                                                                                                                                    |
| EPI_ISL_7368223                                                                                                                                                                                                                                                                                                                                                                                                                                                                                                                                                                                                                                                                                                                                                                                                                                                                                                                                                                                                                                                                                               | labor team w AG                                                                                                         | Department of Biosystems Science and Engineering, ETH Zürich                                                                                                                                                                                                                                                                                                                                                                                                                                       | Andrea Patrignani; Andreas Lindauer; Andrea Cabral de Gouveia; Catharine Aquino; Chaoran Chen; Daniel Ehrsam; Doris Popovic; Griffin White; Isabel Stürmer; Ivan Topolsky; Jay Tracy; Kim Philipp Jablonski; Lara Fuhrmann; Laura Neff; Lennart Opitz; Louis du Plessis; Maria Domenica Moccia; Monika Bucher; Niko Beerenwinkel; Ralph Schlapbach; Rebekka Pohl; Sarah Nadeau; Simon Grüter; Tanja Stadler; Timothy Sykes                         |

We gratefully acknowledge the following Authors from the Originating laboratories responsible for obtaining the specimens, as well as the Submitting laboratories where the genome data were generated and shared via GISAID, on which this research is based.

All Submitters of data may be contacted directly via [www.gisaid.org](http://www.gisaid.org)

Authors are sorted alphabetically.

| Accession ID                                                                        | Originating Laboratory                                         | Submitting Laboratory                                                                                                                        | Authors                                                                                                                                                                                                                                                                                                                                                                                                                                                                                |
|-------------------------------------------------------------------------------------|----------------------------------------------------------------|----------------------------------------------------------------------------------------------------------------------------------------------|----------------------------------------------------------------------------------------------------------------------------------------------------------------------------------------------------------------------------------------------------------------------------------------------------------------------------------------------------------------------------------------------------------------------------------------------------------------------------------------|
| EPI_ISL_7190366                                                                     | PHV-FSS                                                        | PHV-FSS                                                                                                                                      | Chenwei Wang on behalf of Q-PHIRE Genomics                                                                                                                                                                                                                                                                                                                                                                                                                                             |
| EPI_ISL_7259544, EPI_ISL_7259701, EPI_ISL_7259710, EPI_ISL_7259716, EPI_ISL_7259721 | Public Health Ontario Laboratory                               | Public Health Ontario Laboratory                                                                                                             | Aimin Li; Alireza Eshaghi; Andre Villegas; Ashleigh Sullivan; Christine Frantz; Dean Maxwell; Esha Joshi; Jared Simpson; Jennifer L Guthrie; Jonathan B Gubbay; Karthikeyan Sivaraman; Lawrence Heisler; Matthew Watson; Michael CY Li; Michael Laszloffy; Nahuel Fittipaldi; Philip Banh; Richard de Borja; Samir N Patel; Sandeep Nagra; Sandra Zittermann; Sarah Teatero; Vanessa G Allen; Yao Chen; Yogi Sundaravadanam                                                            |
| EPI_ISL_6795834                                                                     | ZARV/NHLS, Department Medical Virology, University of Pretoria | CERI, Centre for Epidemic Response and Innvoation, Stellenbosch University and KRISP, KZN Research Innovation and Sequencing Platform, UKZN. | Adriano Mendes; Amoaka D; Amy Strydom; Arisha Maharaj; Bestor P; Bhiman J; Engelbrecht S; Everatt J; Goedhals D; Hardie D; Hsiao M; Iranzadeh A; Lessells R; Makatini Z; Maponga T; Mdlalose N; Micheala Davids; Mlisana K; Moir M; NGS-SA (Scheepers C; Naidoo Y; Nyaga M) Giandhari J; Oluwakemi M; Pillay S; Preiser W; Ramphal U; Ramphal Y; San JE; Sim Mayaphi and Marietjie Venter; Tegally H; Tshibulula D; Venter M; Wilkinson E; Williamson C; de Oliveira T; von Gottberg A |
